# Supplementary material for: Highly efficient multiplex human T cell engineering without double-strand breaks using Cas9 base editors
Source: PubMed Central journal article supplement (PMC6864045; doi:10.1038/s41467-019-13007-6), 2019-11-19

# Highly efficient multiplex human T cell engineering without double-strand breaks using Cas9 base editors

Appendix III - Indel Distribution Plots of Next Generation Sequencing

1. A PDCD1 Ex.1 SD + BE3 unconc. mRNA 1.5 µg

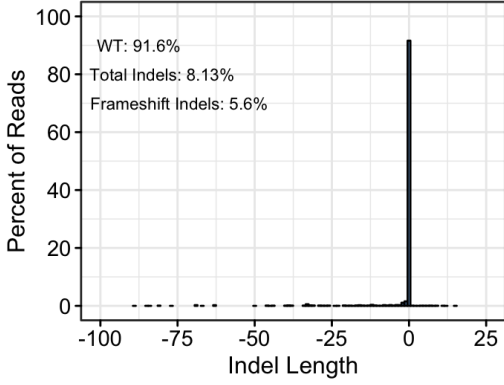

2. B PDCD1 Ex.1 SD + BE3 unconc. mRNA 1.5 µg

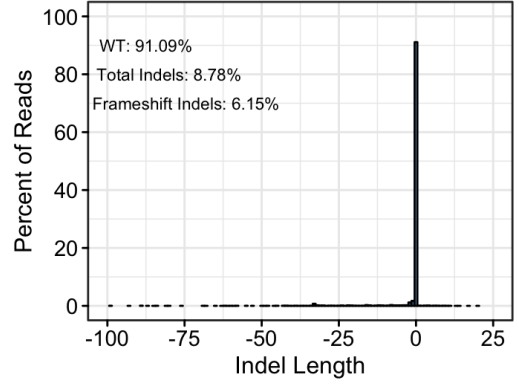

3. C PDCD1 Ex.1 SD + BE3 unconc. mRNA 1.5 µg

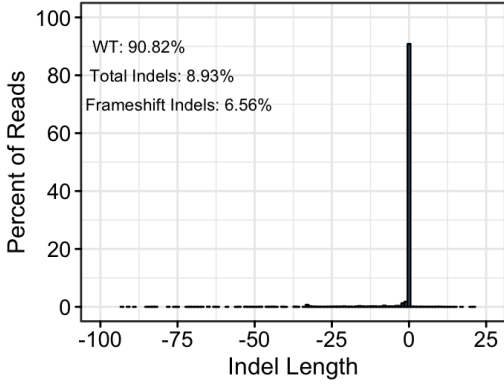

4. A PDCD1 Ex.1 SD + BE4 unconc. mRNA 1.5 µg

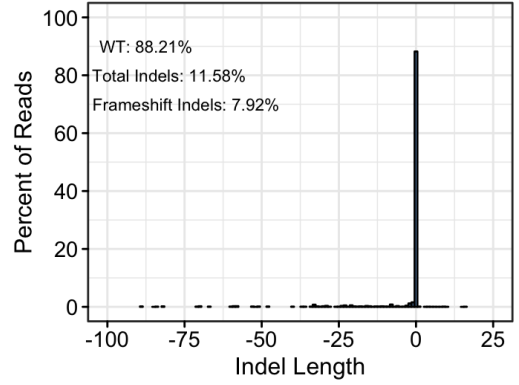

5. B PDCD1 Ex.1 SD + BE4 unconc. mRNA 1.5 µg

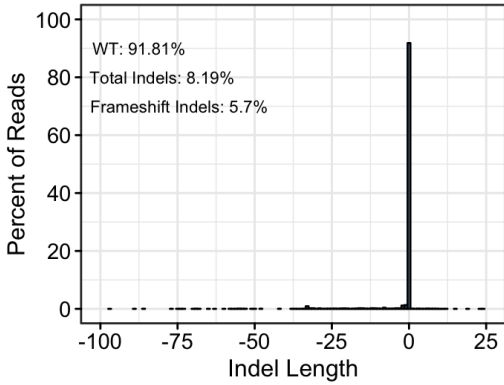

6. C PDCD1 Ex.1 SD + BE4 unconc. mRNA 1.5 µg

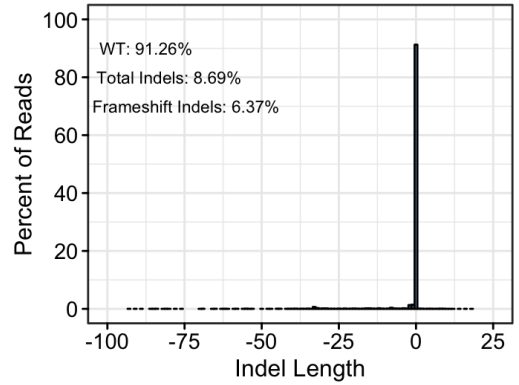

7. D PDCD1 Ex.1 SD + Pulse

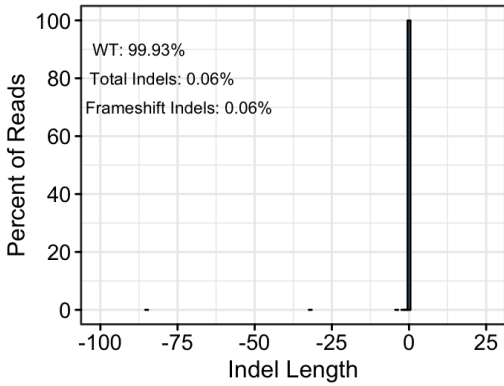

8. A PDCD1 Ex.1 SD + Pulse

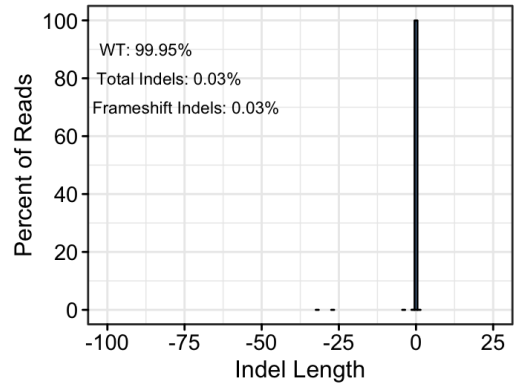

9. A PDCD1 Ex.2 SA + BE3 unconc. mRNA 1.5  $\mu$ g

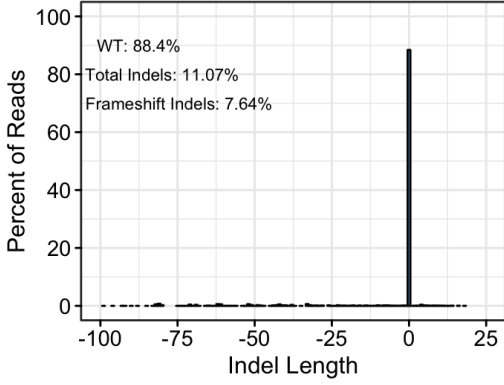

10. B PDCD1 Ex.2 SA + BE3 unconc. mRNA 1.5  $\mu$ g

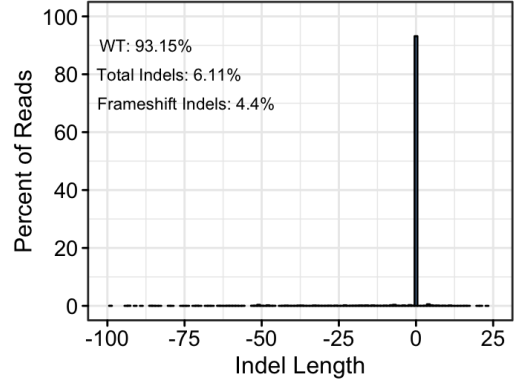

11. C PDCD1 Ex.2 SA + BE3 unconc. mRNA 1.5  $\mu$ g

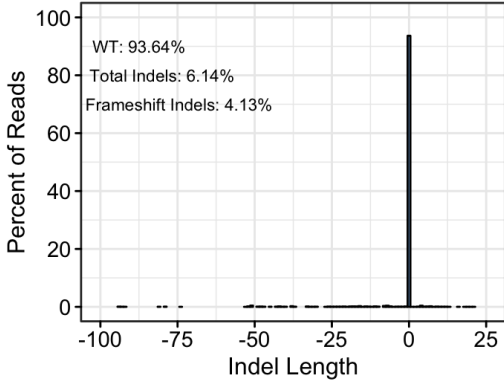

12. A PDCD1 Ex.2 SA + BE4 unconc. mRNA 1.5  $\mu$ g

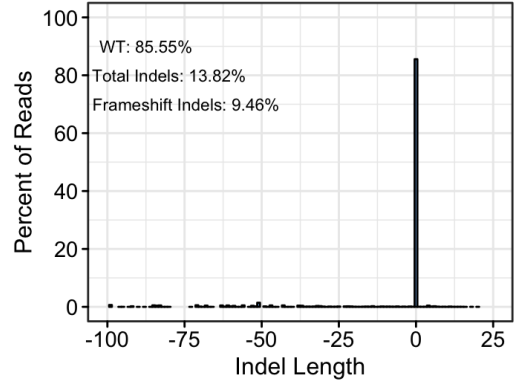

13. B PDCD1 Ex.2 SA + BE4 unconc. mRNA 1.5  $\mu$ g

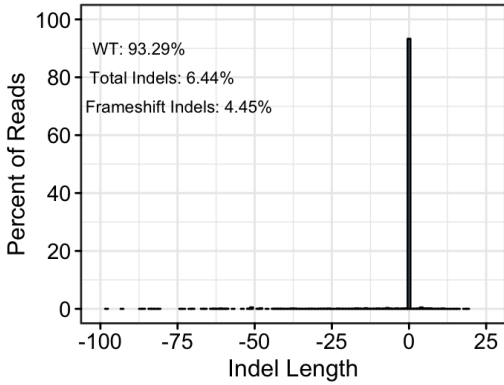

14. C PDCD1 Ex.2 SA + BE4 unconc. mRNA 1.5  $\mu$ g

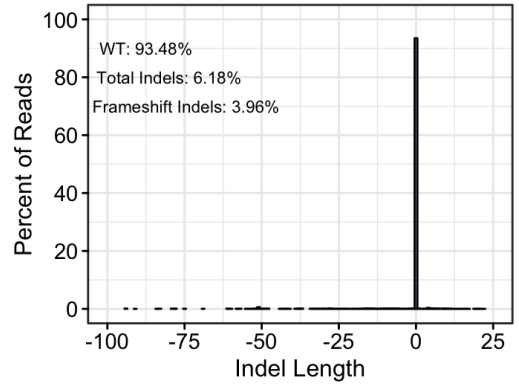

15. D PDCD1 Ex.2 SA + Pulse

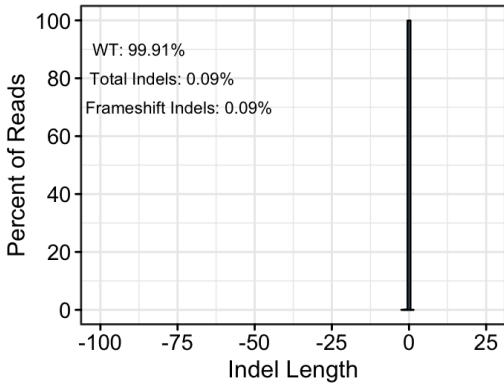

16. A PDCD1 Ex.2 SA + Pulse

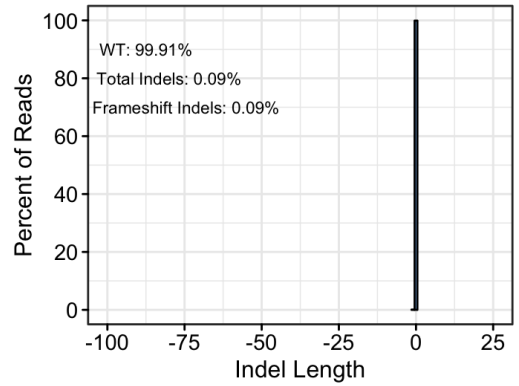

17. A PDCD1 Ex.3 SA + BE3 unconc. mRNA 1.5 µg

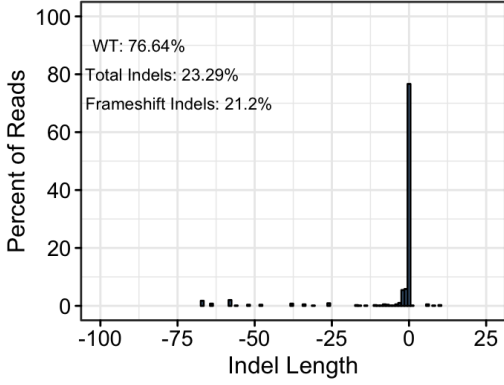

18. B PDCD1 Ex.3 SA + BE3 unconc. mRNA 1.5 µg

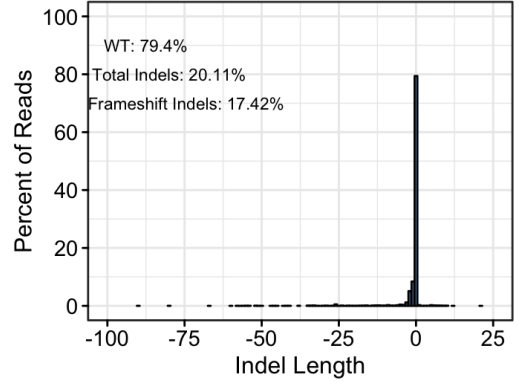

19. C PDCD1 Ex.3 SA + BE3 unconc. mRNA 1.5 µg

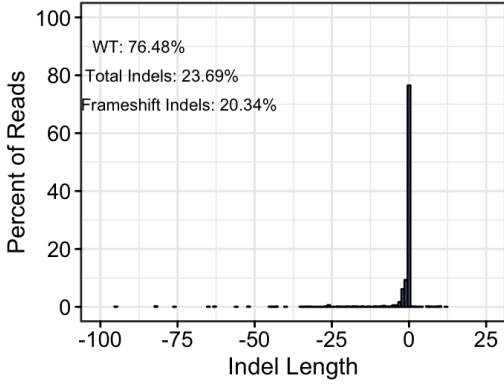

20. A PDCD1 Ex.3 SA + BE4 unconc. mRNA 1.5 µg

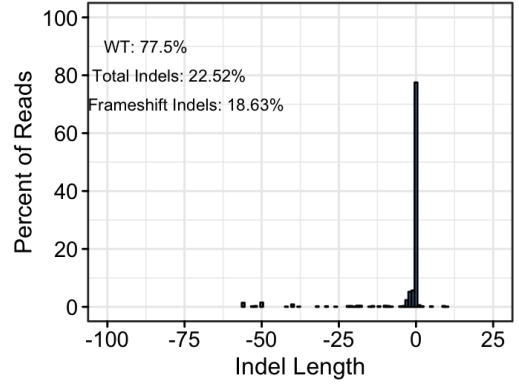

21. B PDCD1 Ex.3 SA + BE4 unconc. mRNA 1.5 µg

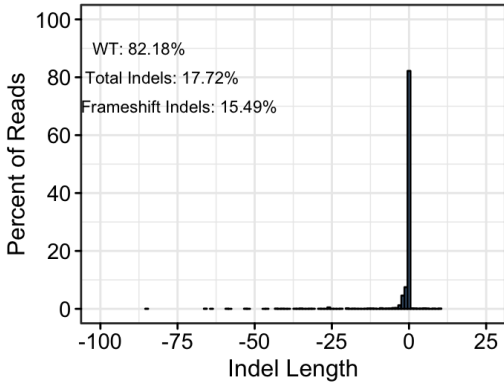

22. C PDCD1 Ex.3 SA + BE4 unconc. mRNA 1.5 µg

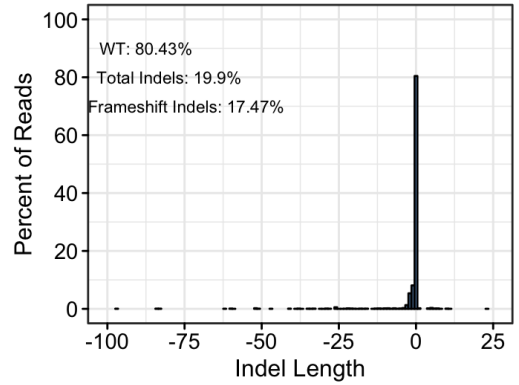

23. D PDCD1 Ex.3 SA + Pulse

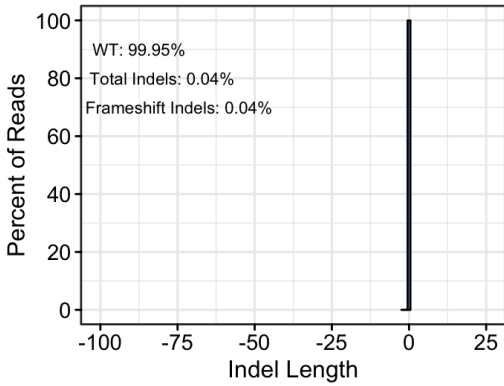

24. A PDCD1 Ex.3 SA + Pulse

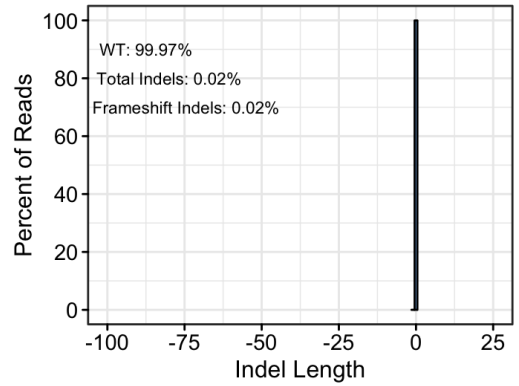

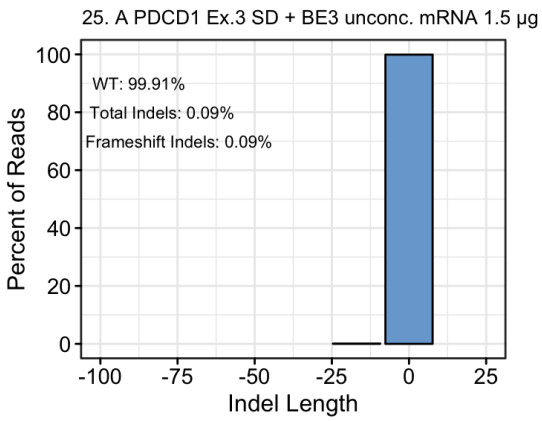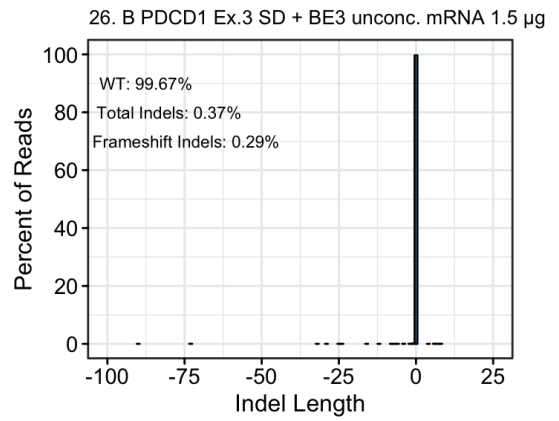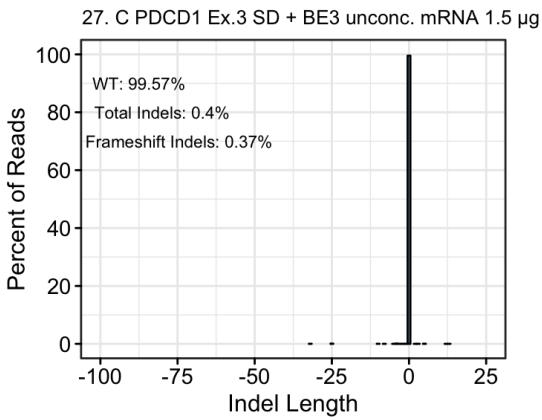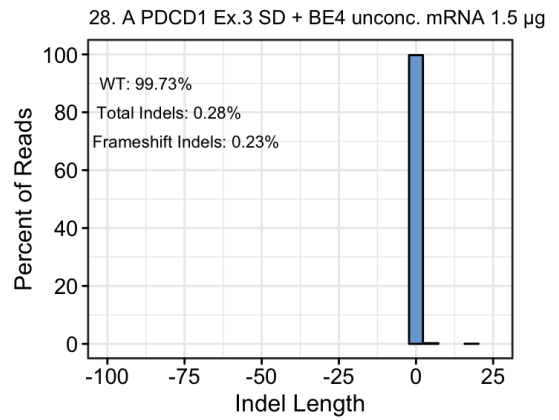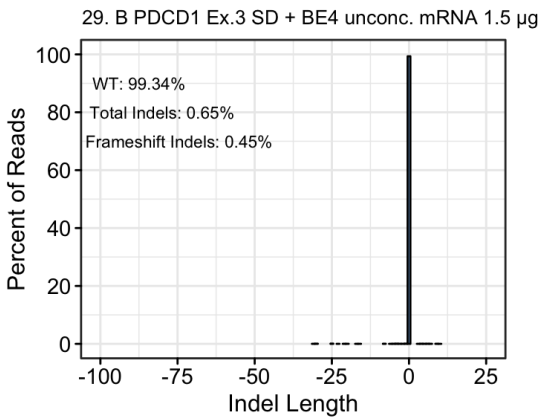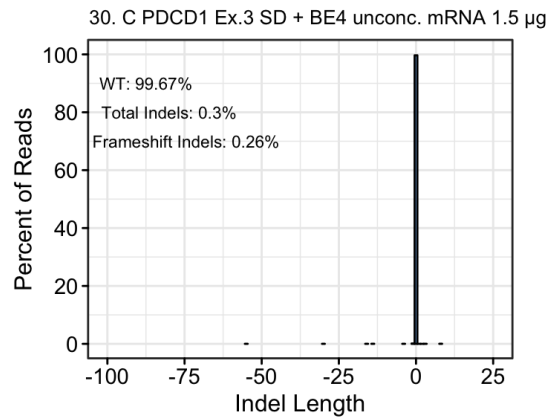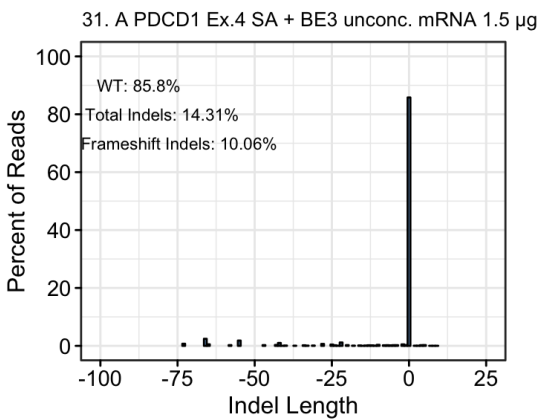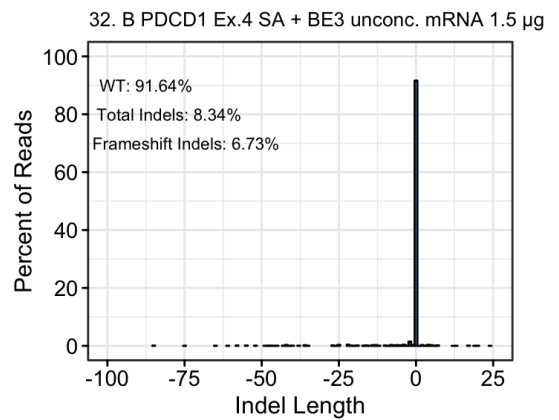

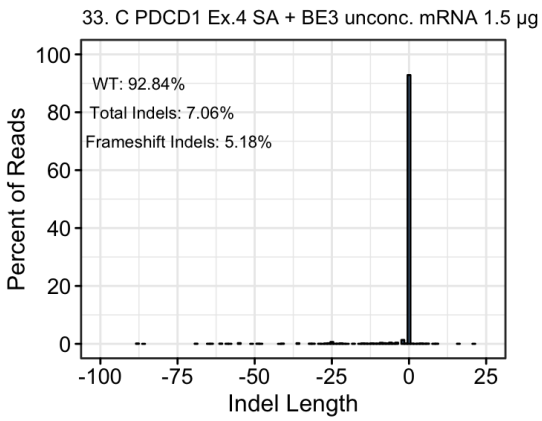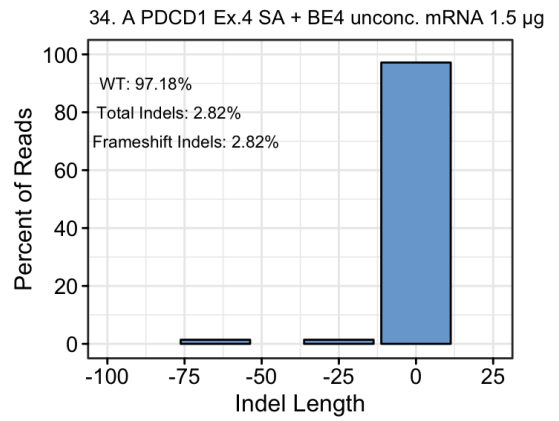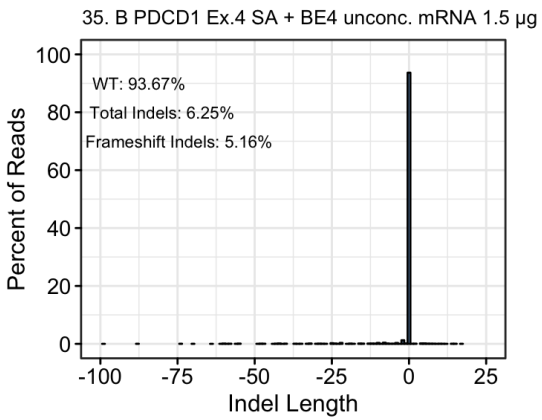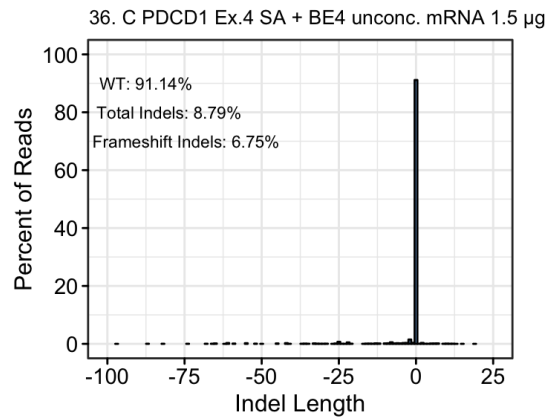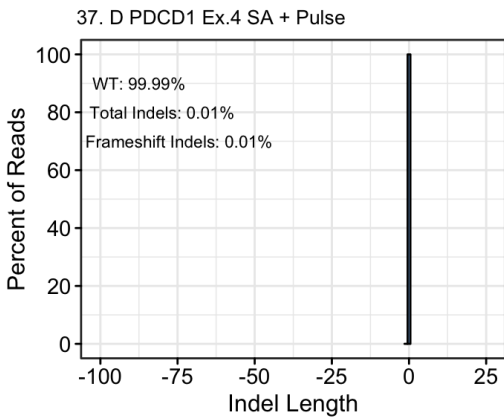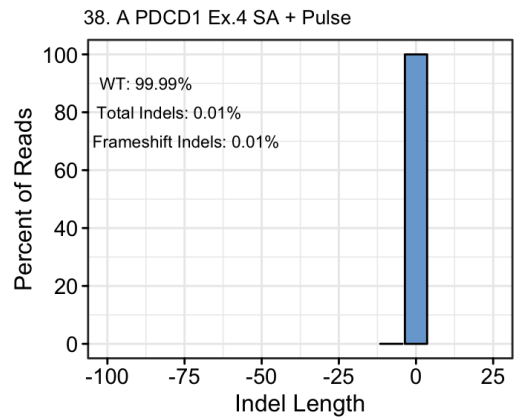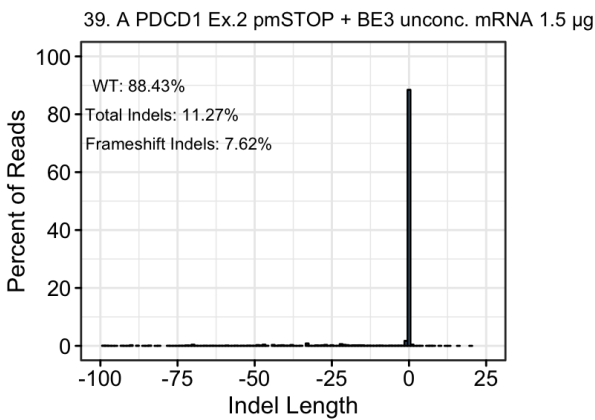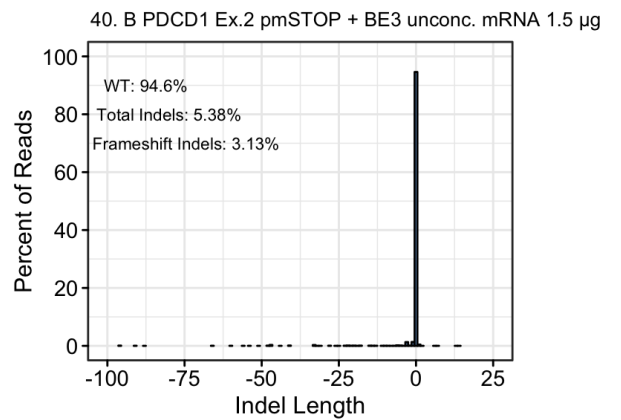

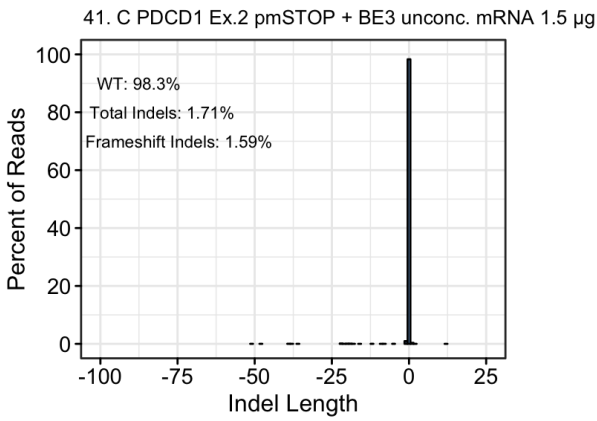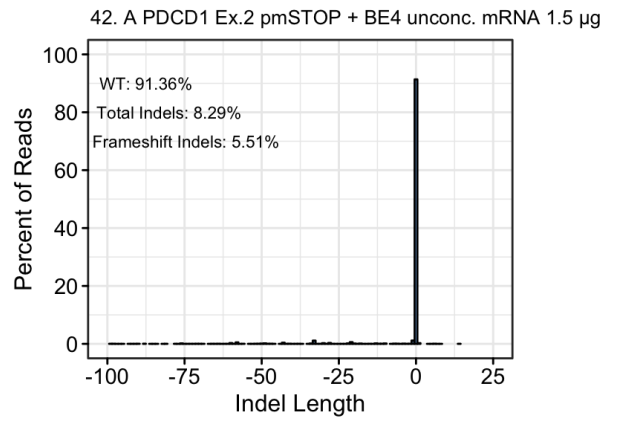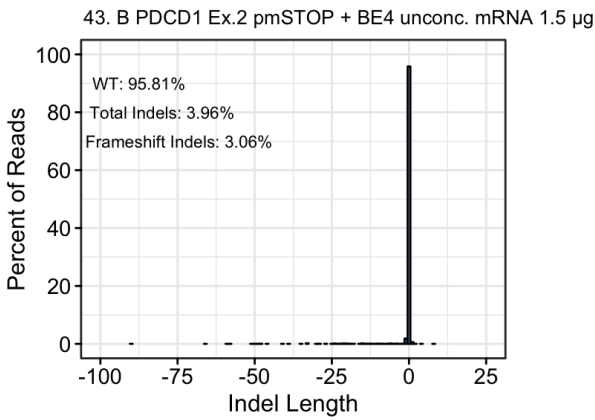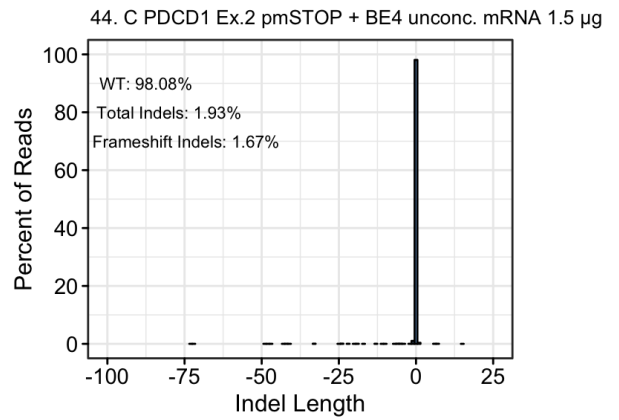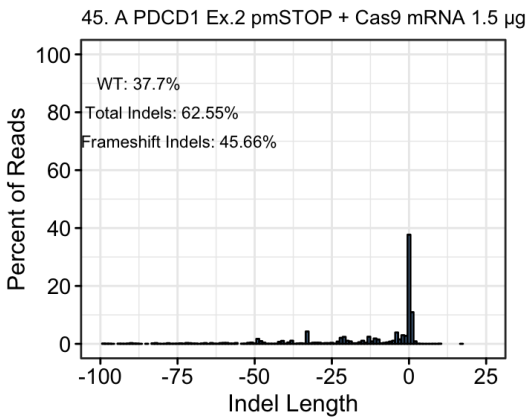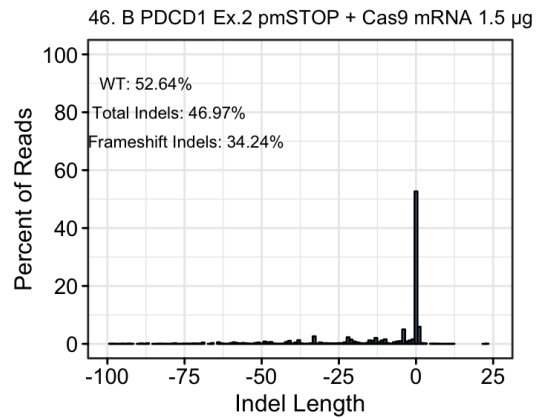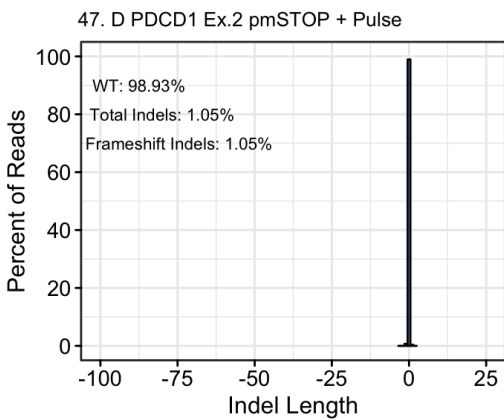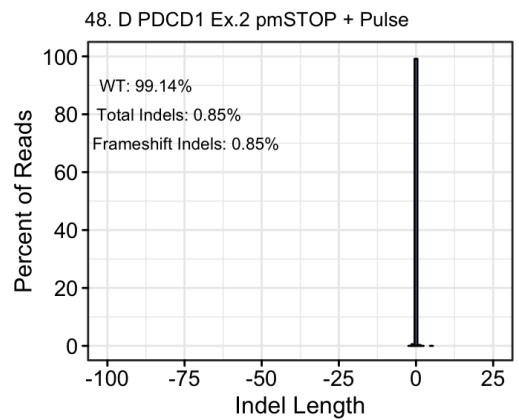

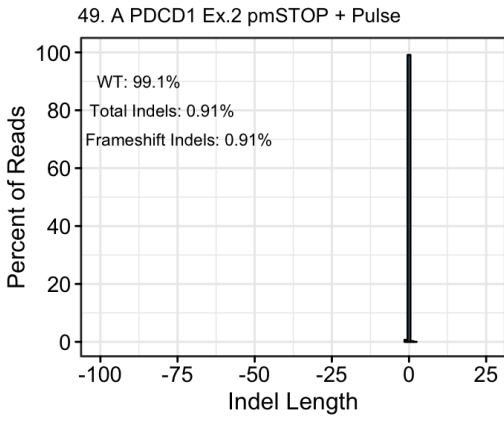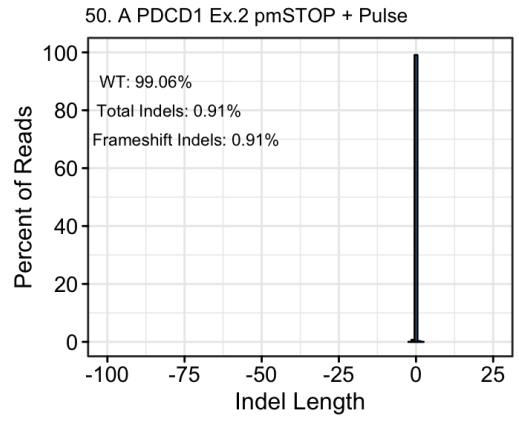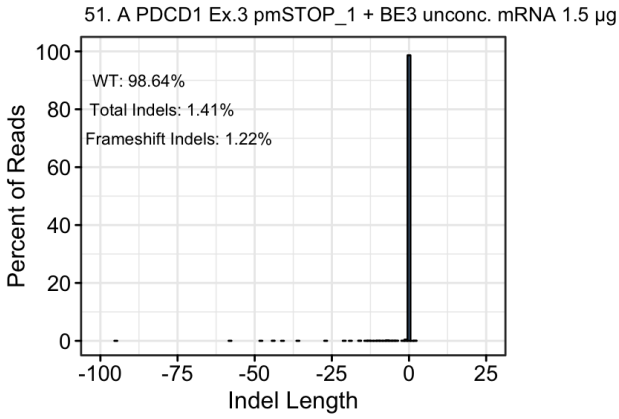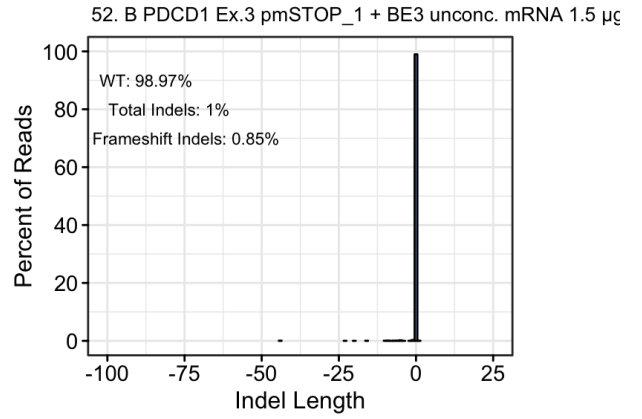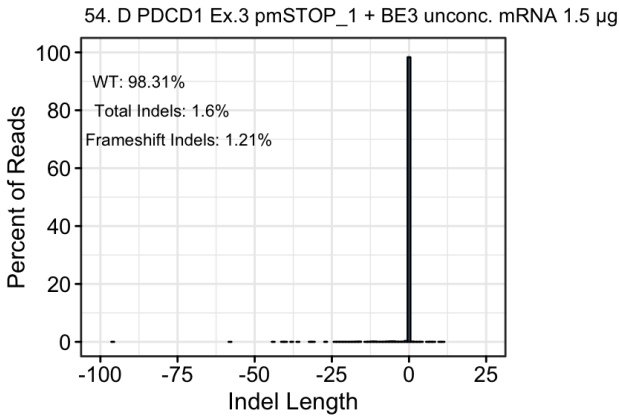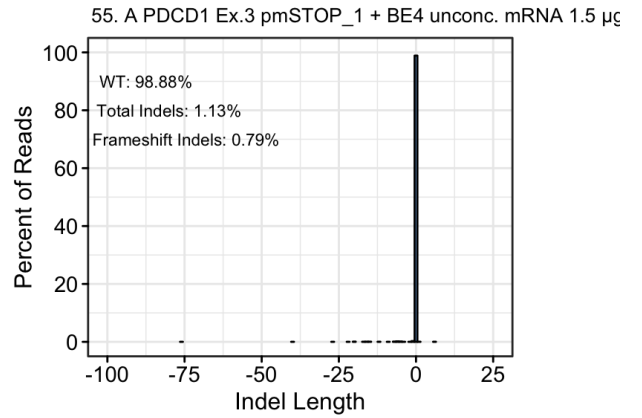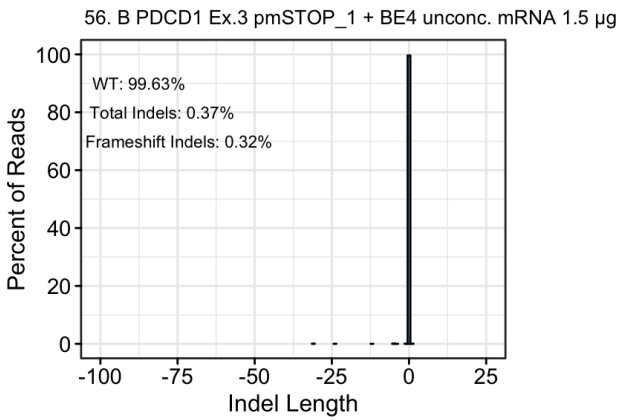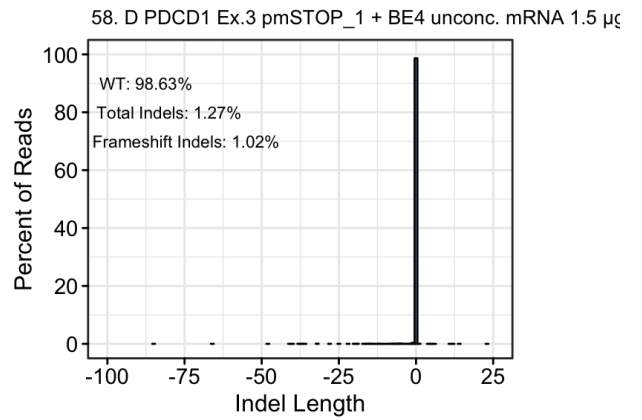



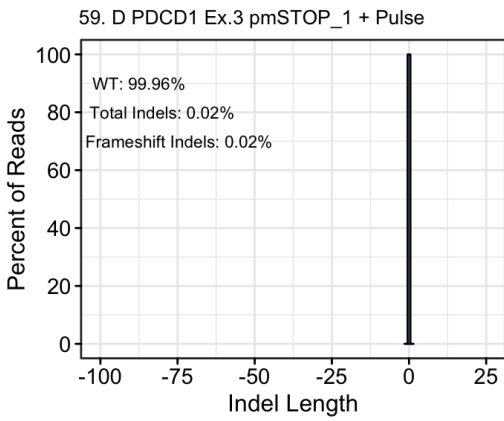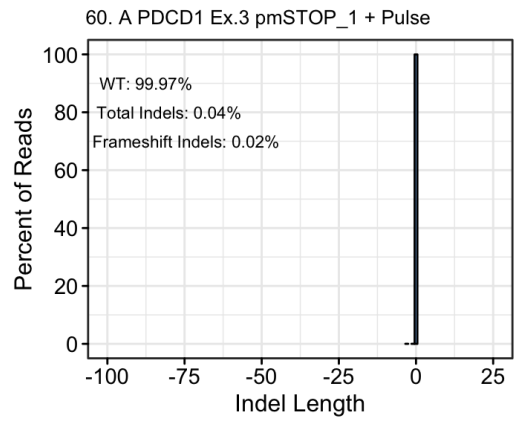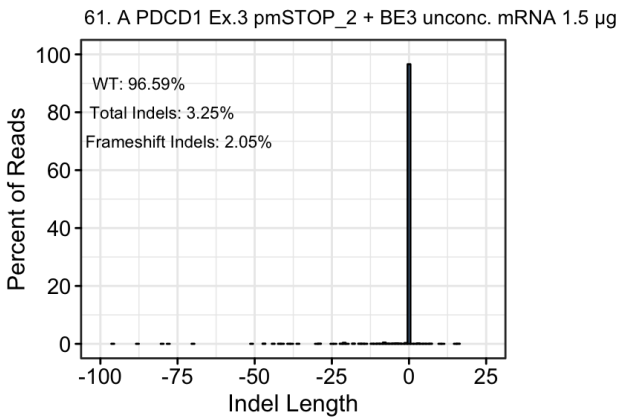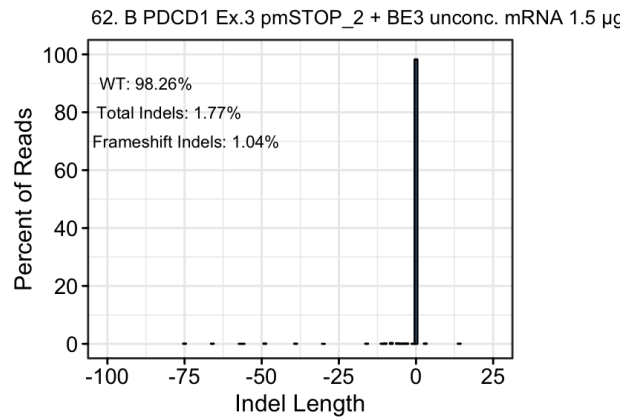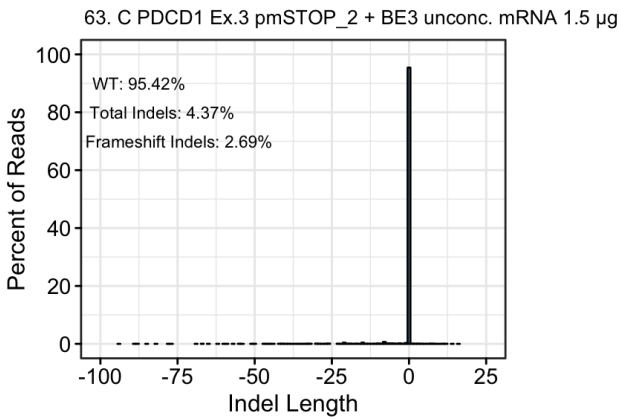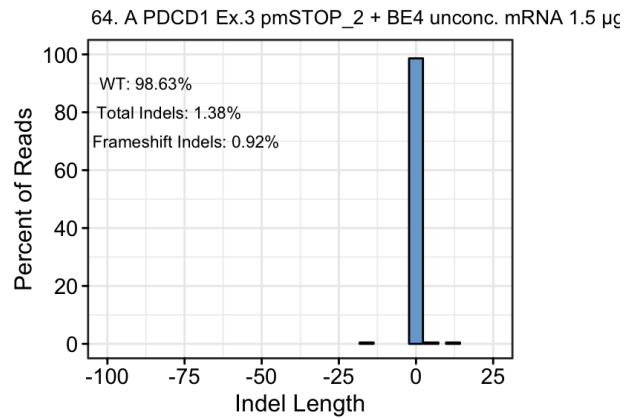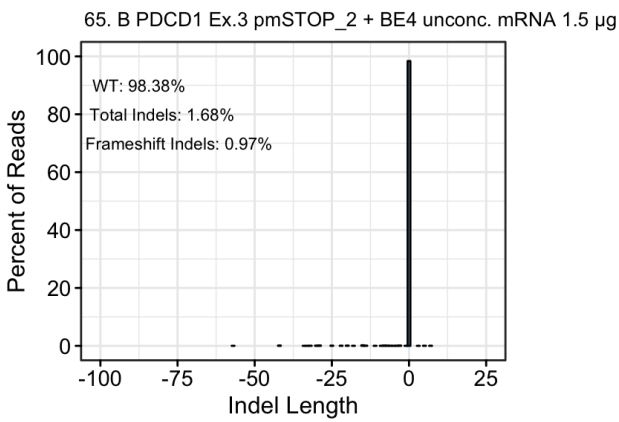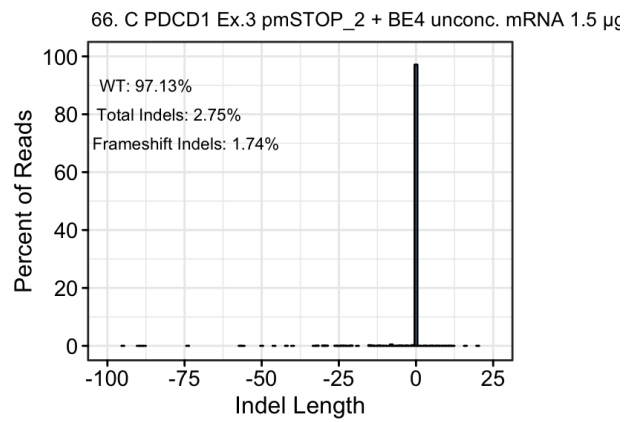

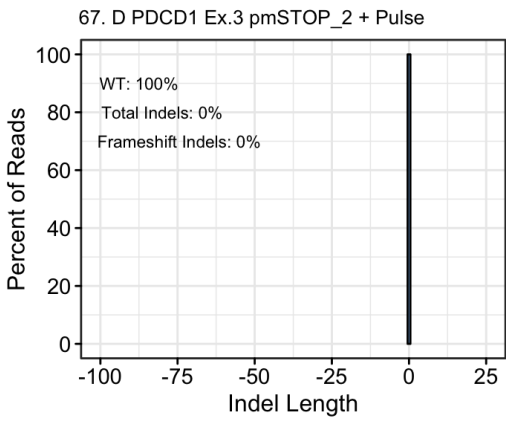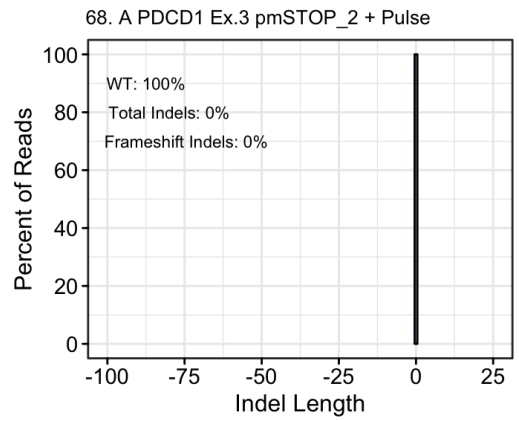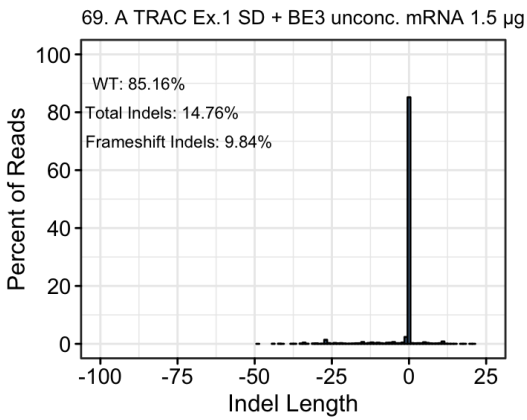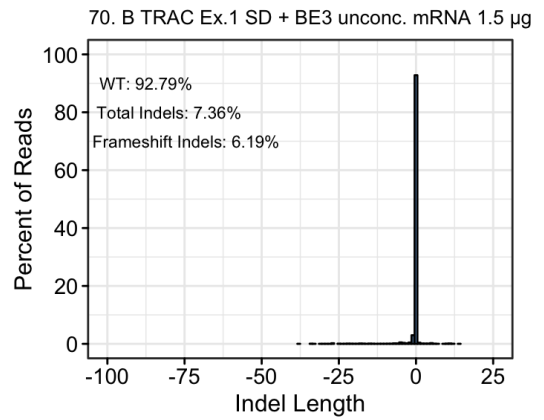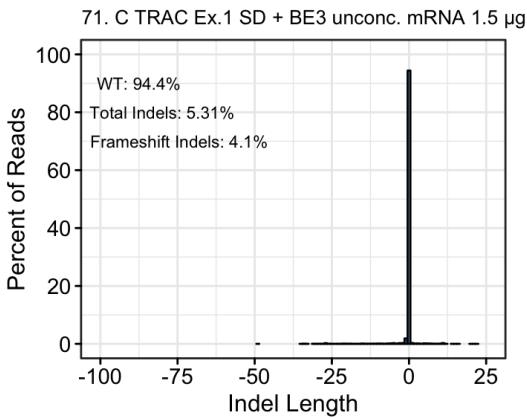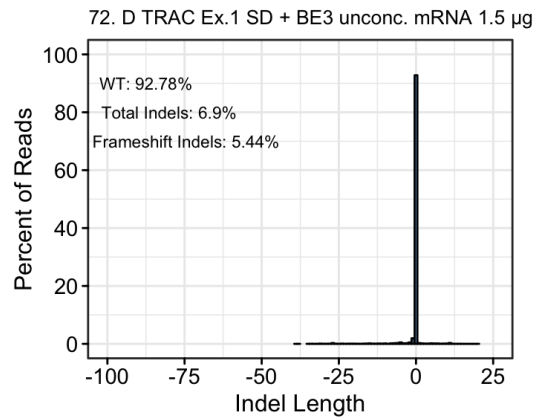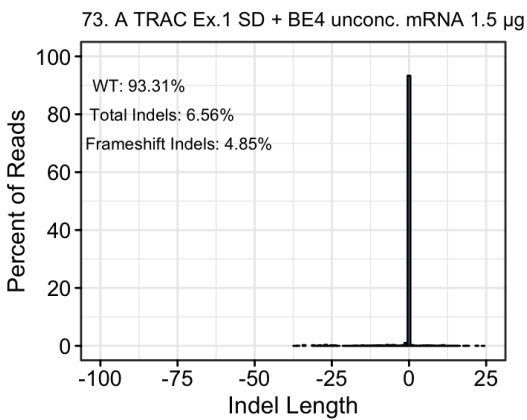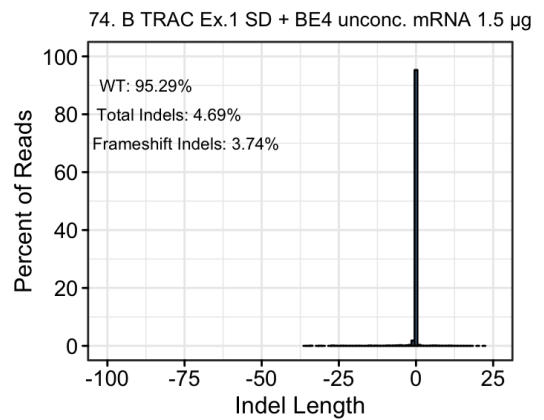

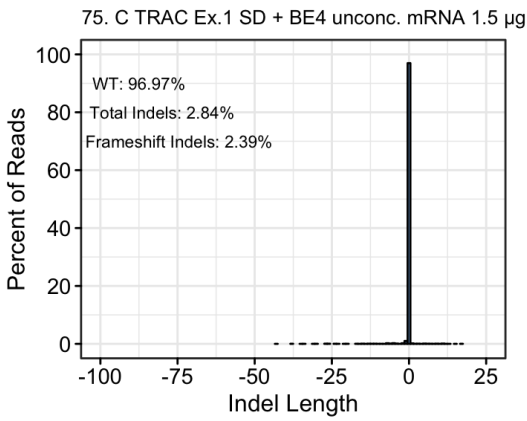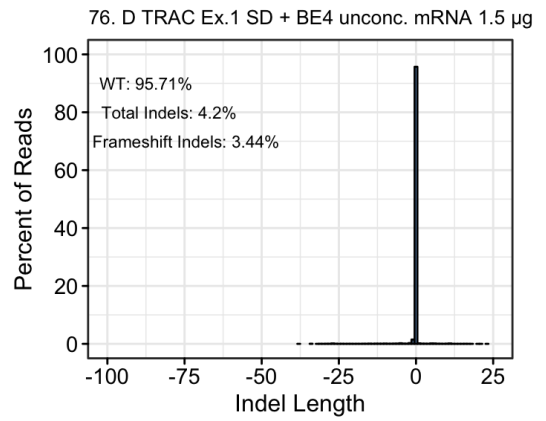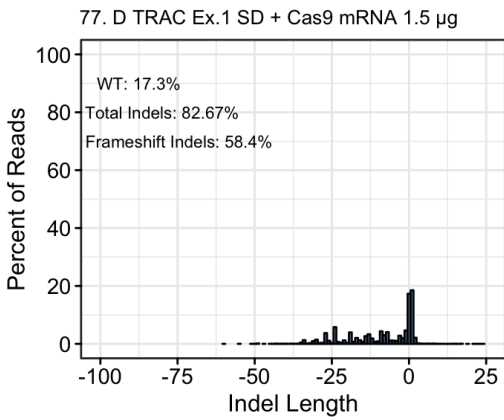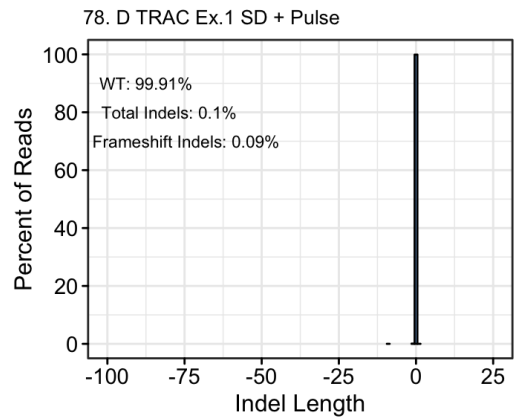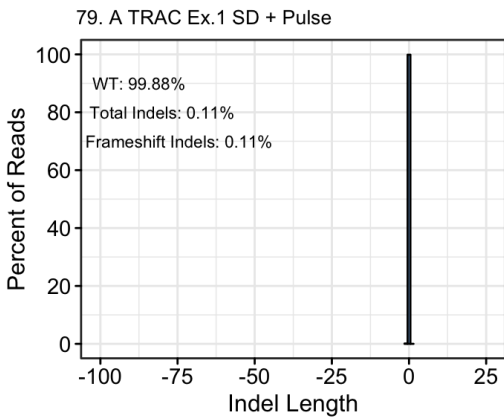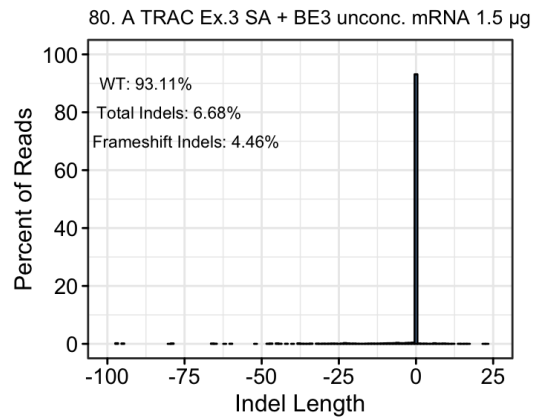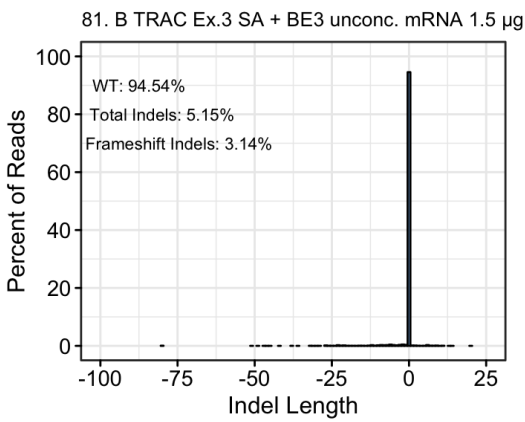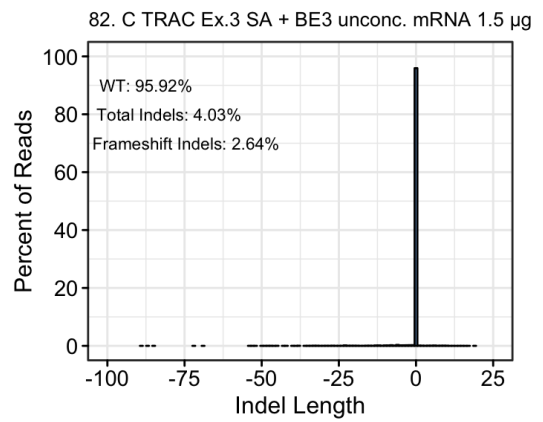

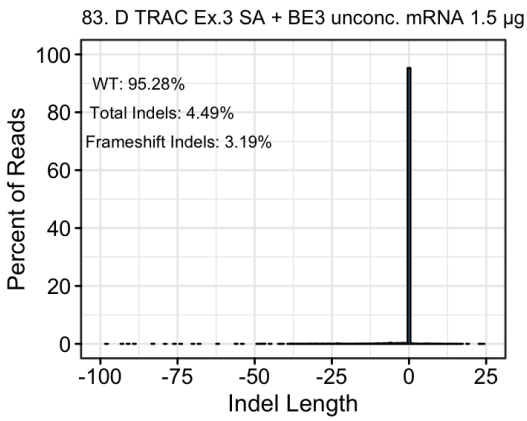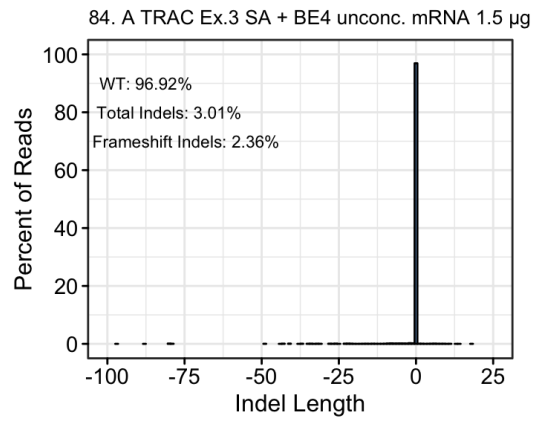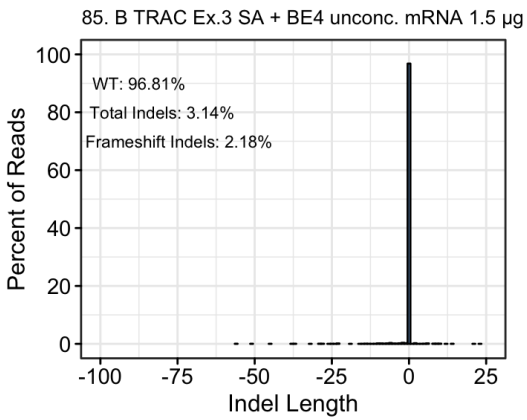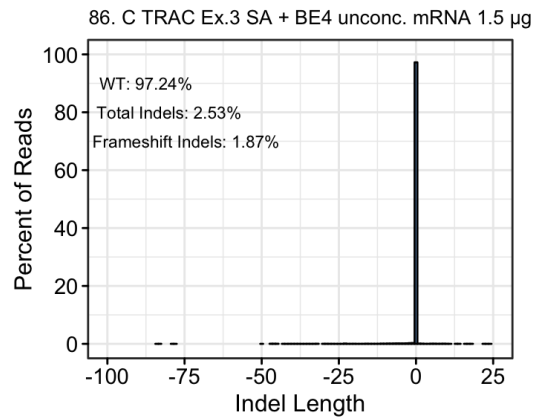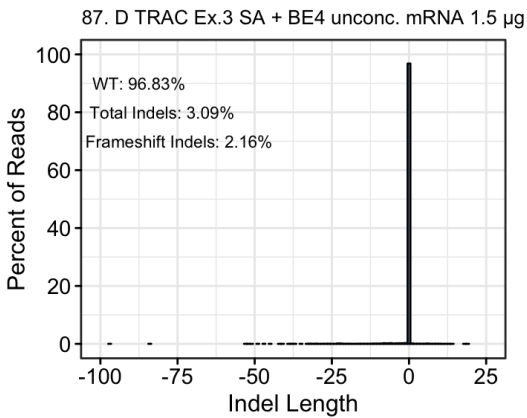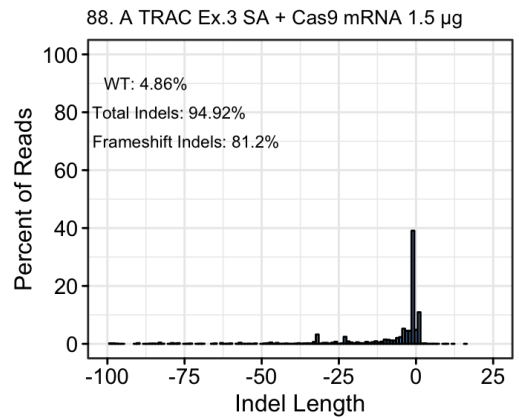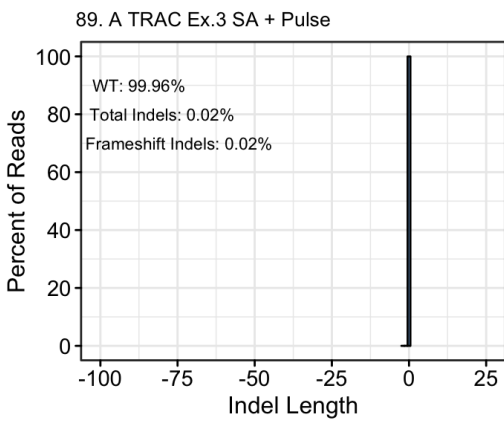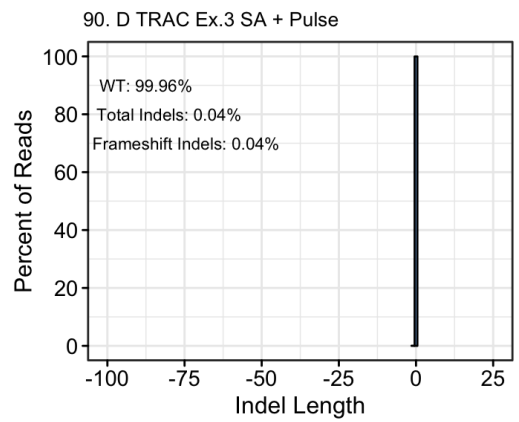

91. A TRAC Ex.3 pmSTOP\_1 + BE3 unconc. mRNA 1.5 µg

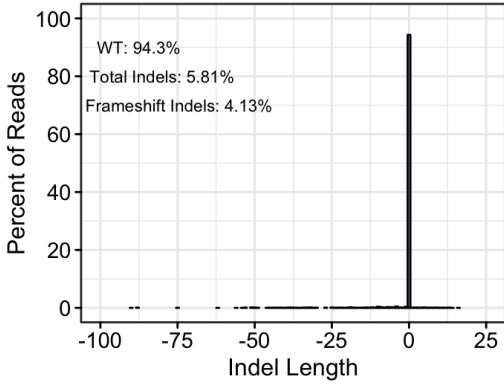

92. B TRAC Ex.3 pmSTOP\_1 + BE3 unconc. mRNA 1.5 µg

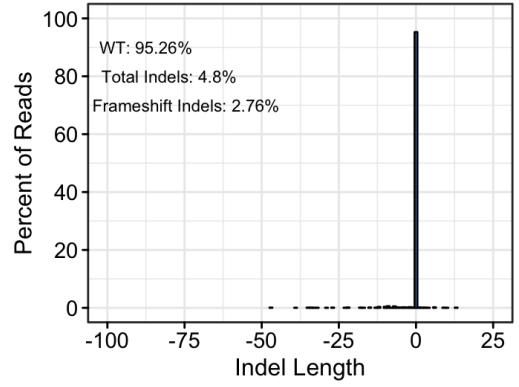

93. C TRAC Ex.3 pmSTOP\_1 + BE3 unconc. mRNA 1.5 µg

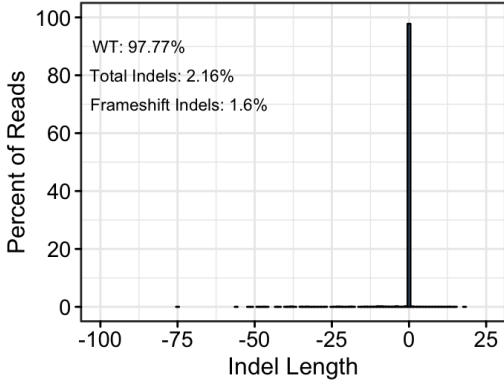

94. A TRAC Ex.3 pmSTOP\_1 + BE4 unconc. mRNA 1.5 µg

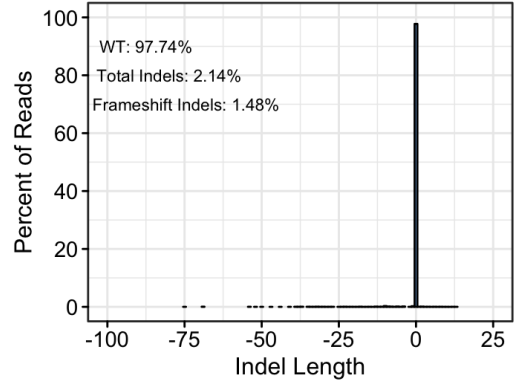

95. B TRAC Ex.3 pmSTOP\_1 + BE4 unconc. mRNA 1.5 µg

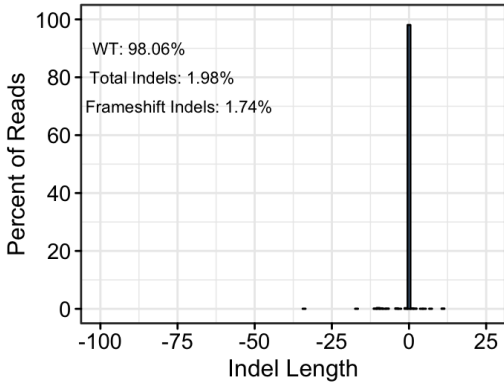

96. C TRAC Ex.3 pmSTOP\_1 + BE4 unconc. mRNA 1.5 µg

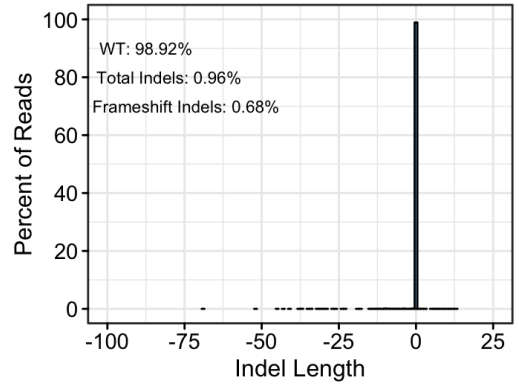

97. D TRAC Ex.3 pmSTOP\_1 + Pulse

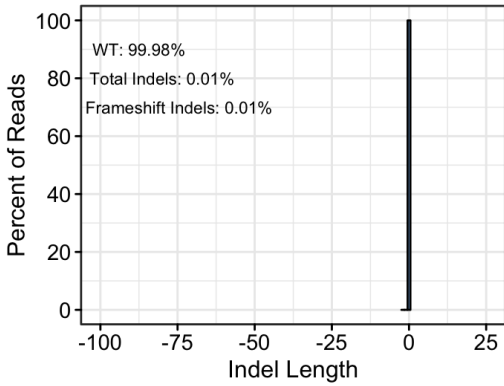

98. A TRAC Ex.3 pmSTOP\_1 + Pulse

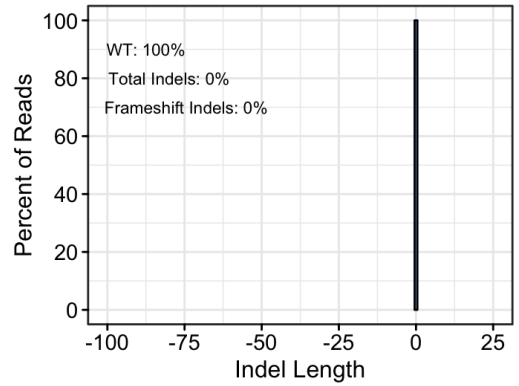

99. A TRAC Ex.3 pmSTOP\_2 + BE3 unconc. mRNA 1.5 µg

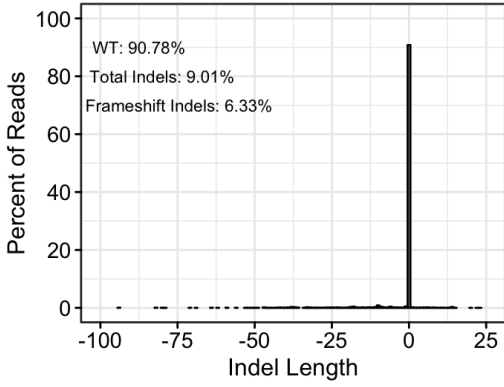

100. B TRAC Ex.3 pmSTOP\_2 + BE3 unconc. mRNA 1.5 µg

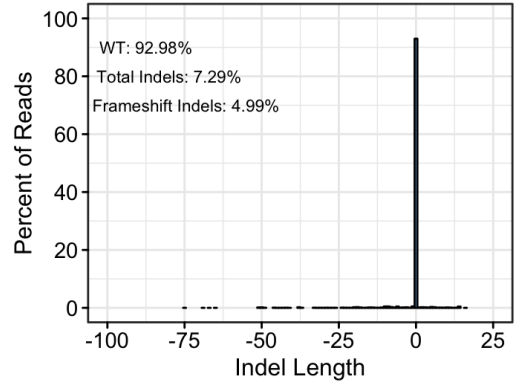

101. C TRAC Ex.3 pmSTOP\_2 + BE3 unconc. mRNA 1.5 µg

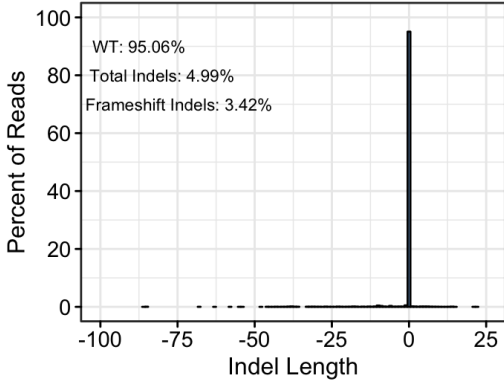

102. A TRAC Ex.3 pmSTOP\_2 + BE4 unconc. mRNA 1.5 µg

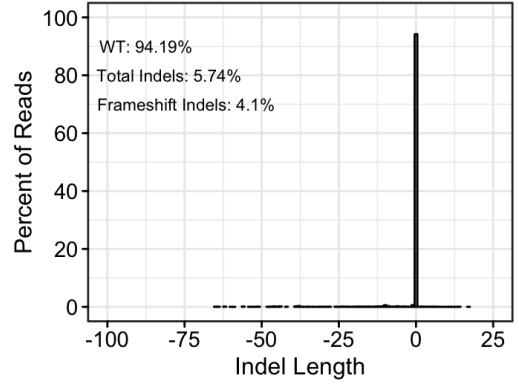

103. B TRAC Ex.3 pmSTOP\_2 + BE4 unconc. mRNA 1.5 µg

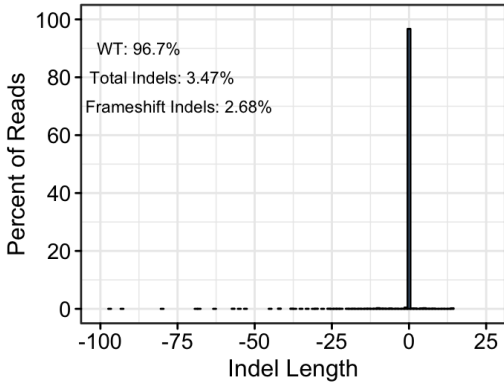

104. C TRAC Ex.3 pmSTOP\_2 + BE4 unconc. mRNA 1.5 µg

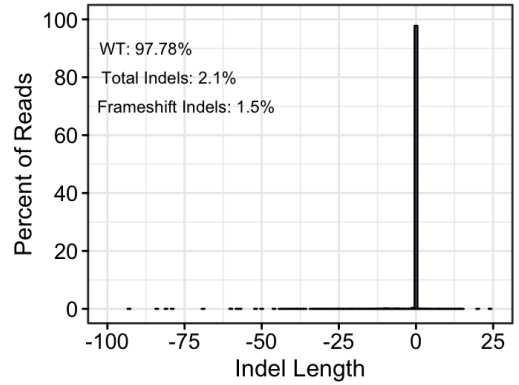

105. D TRAC Ex.3 pmSTOP\_2 + Pulse



106. A TRAC Ex.3 pmSTOP\_2 + Pulse



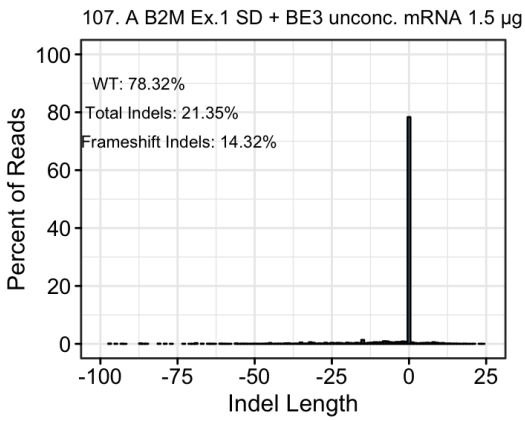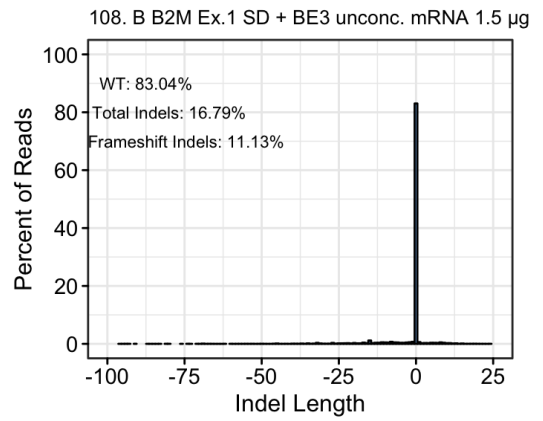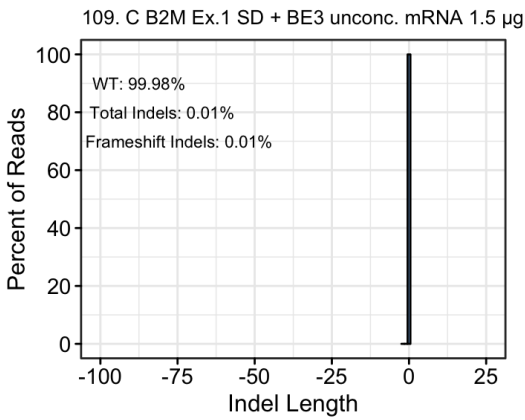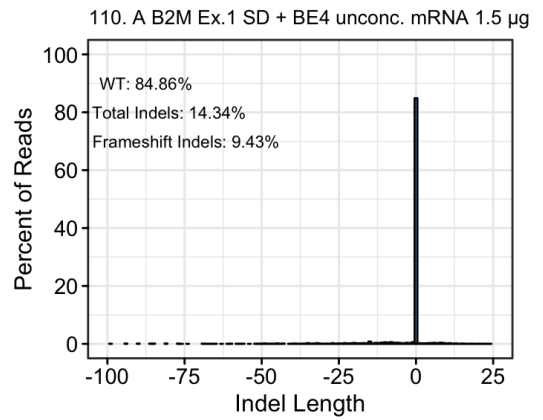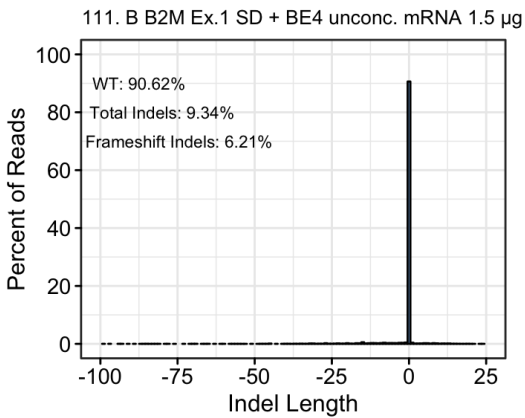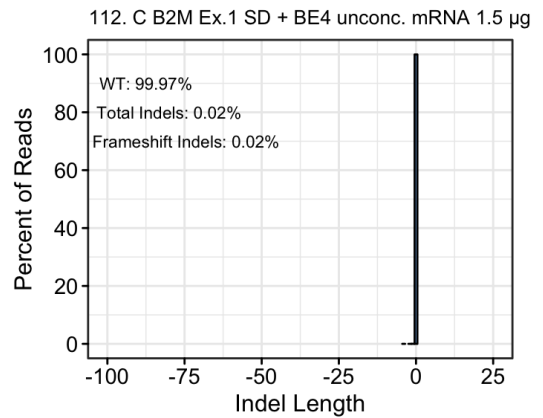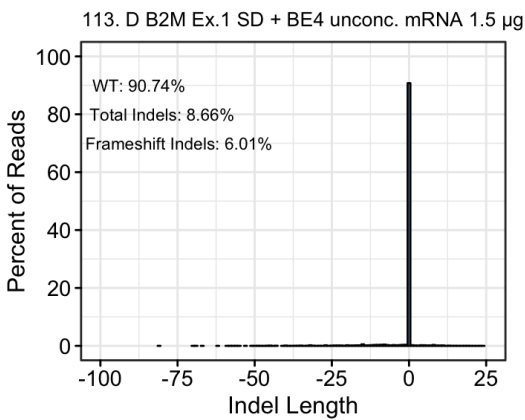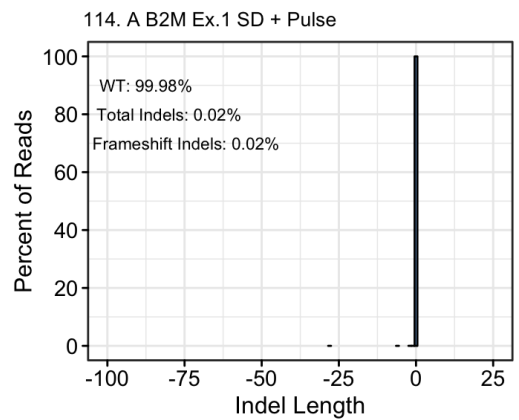

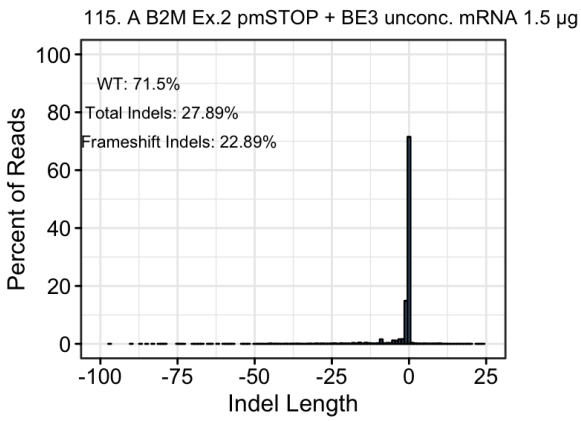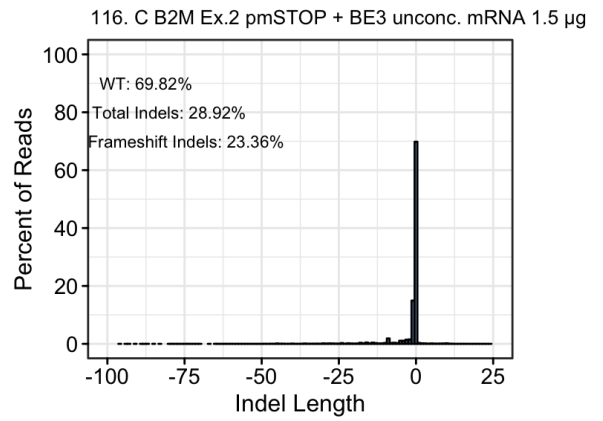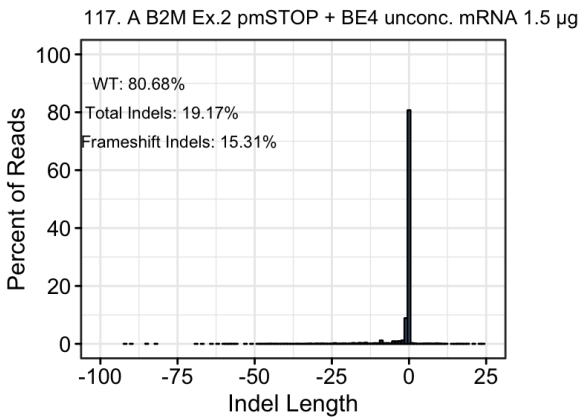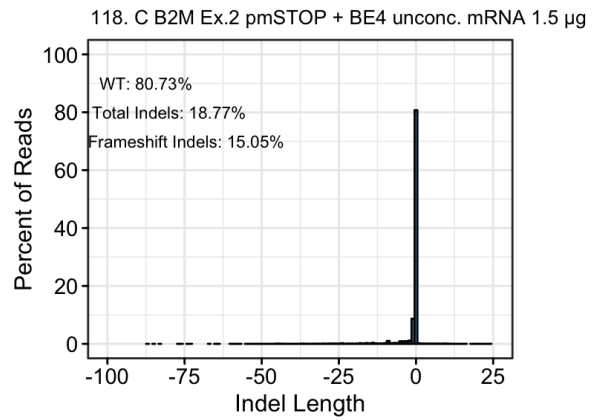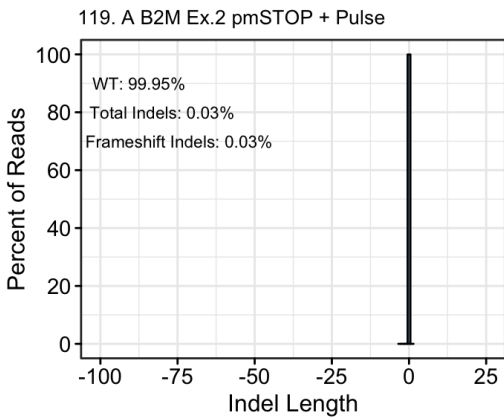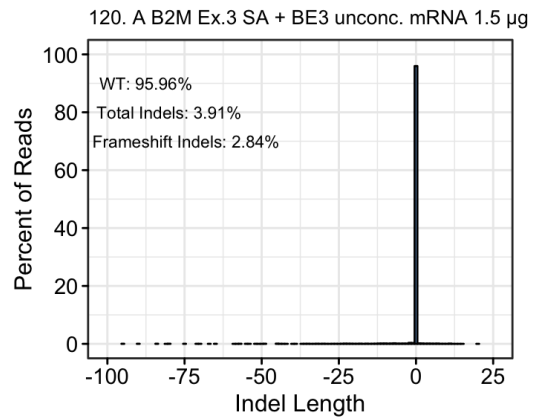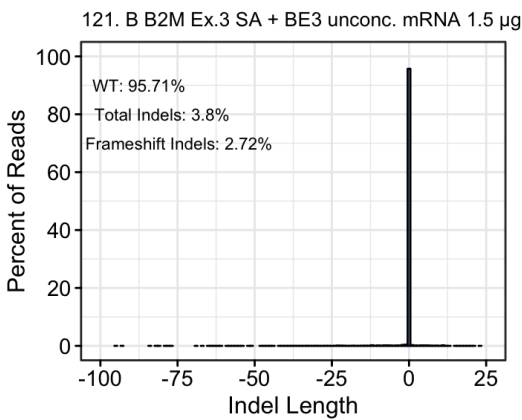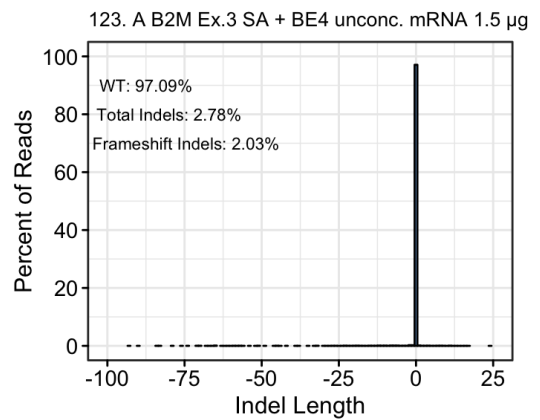



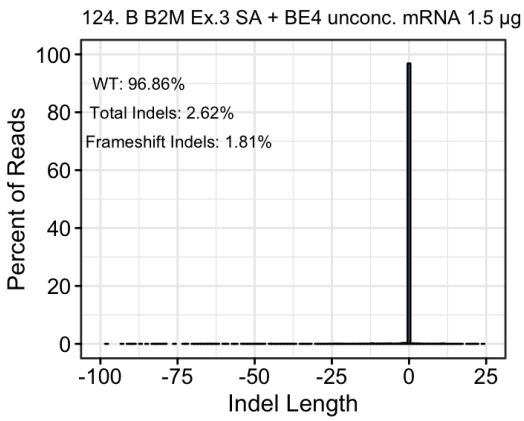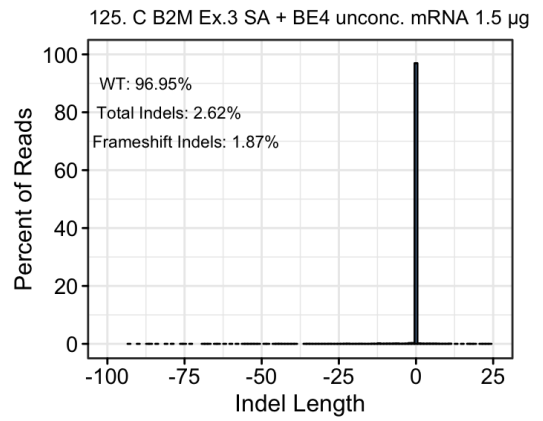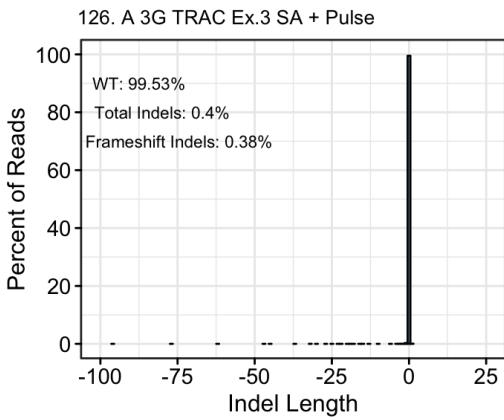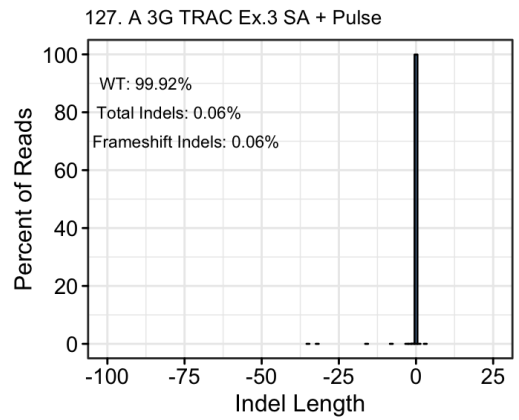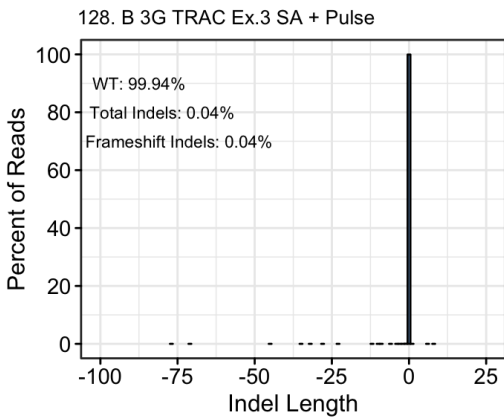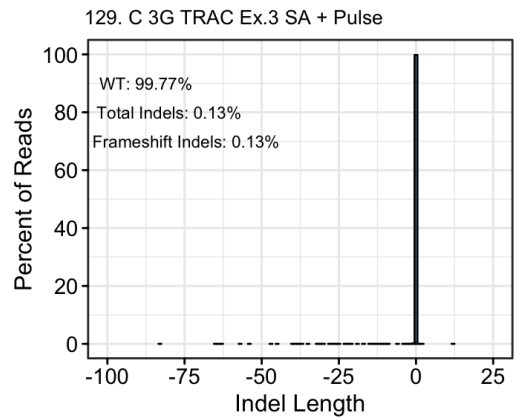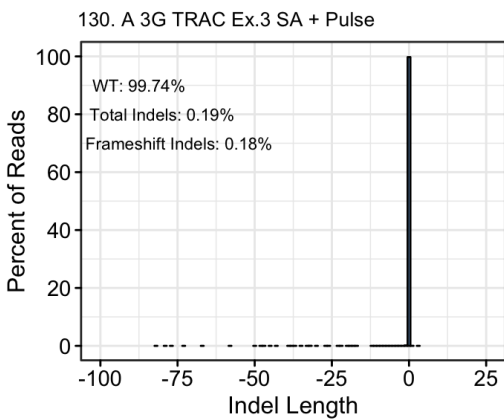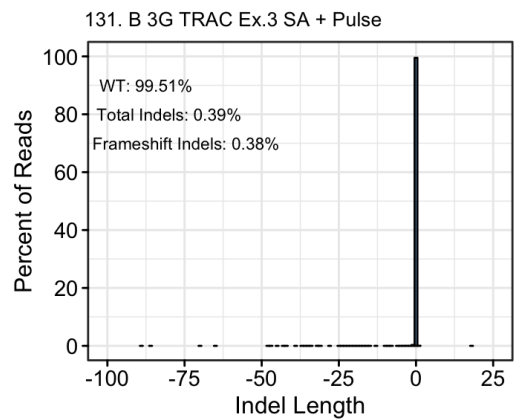

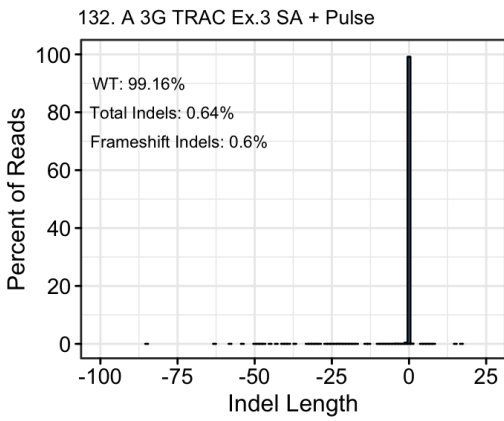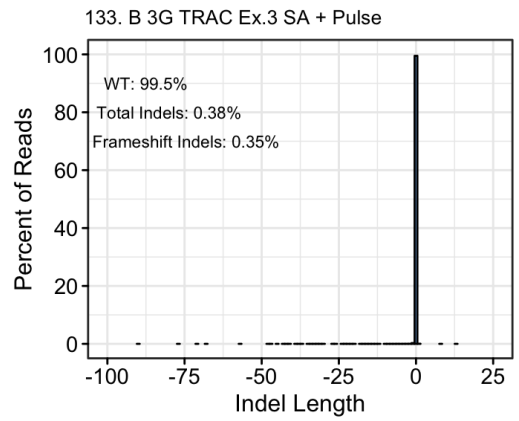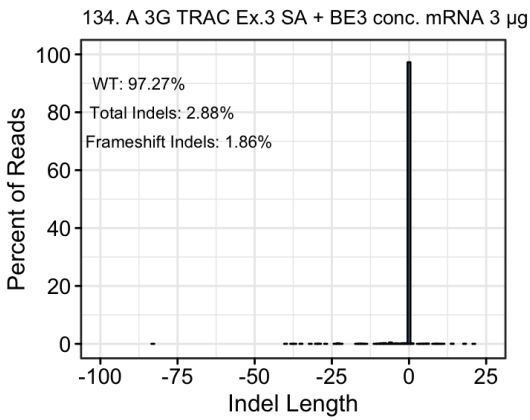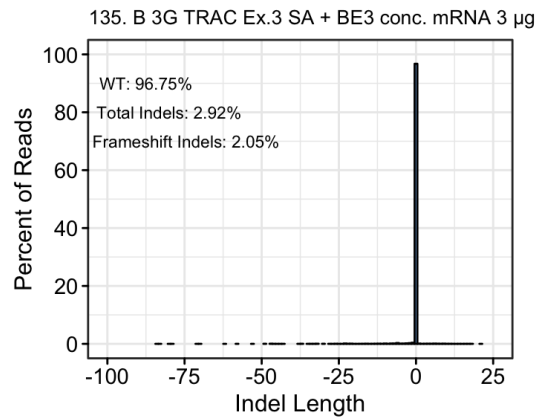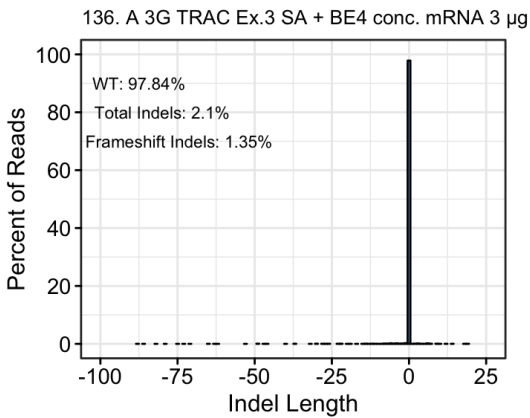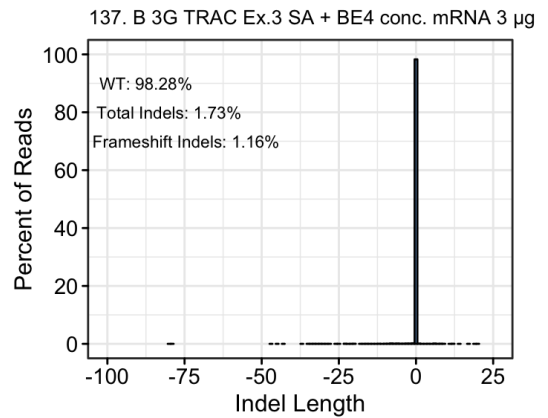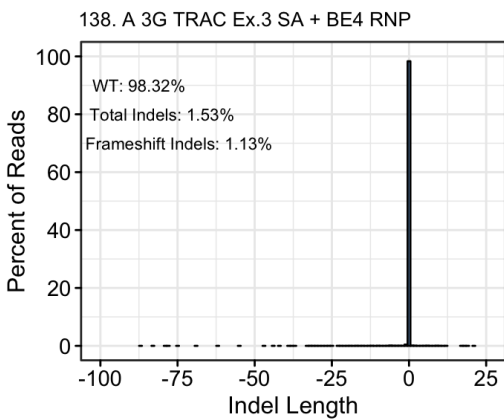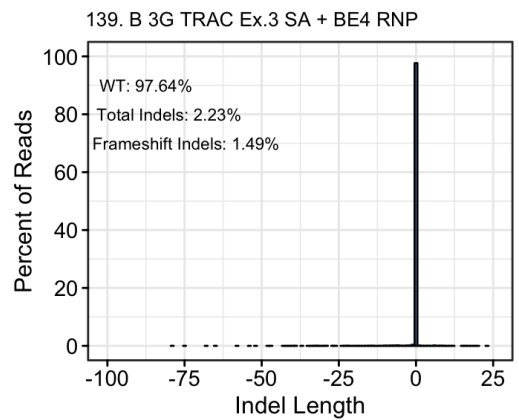

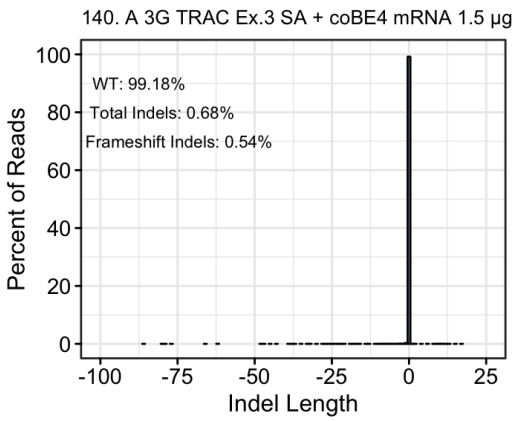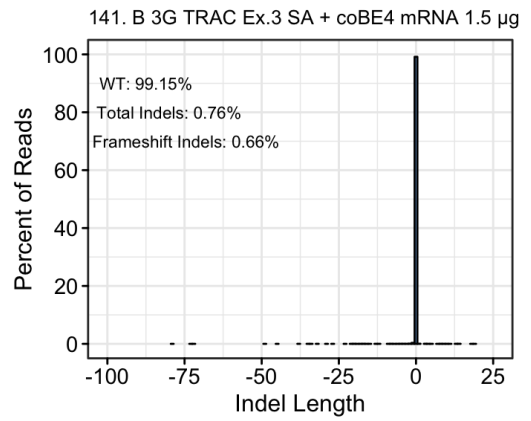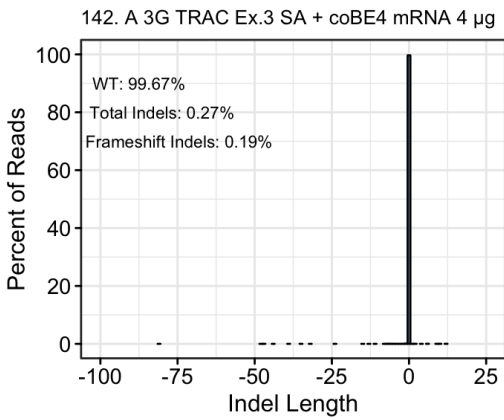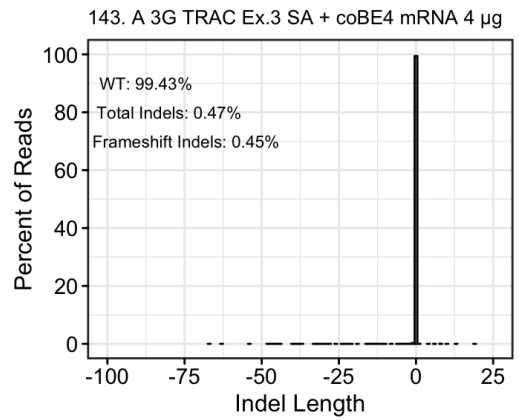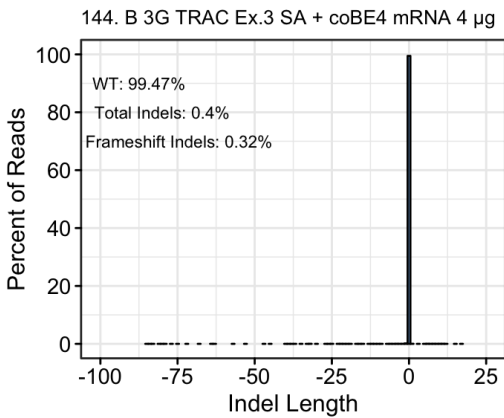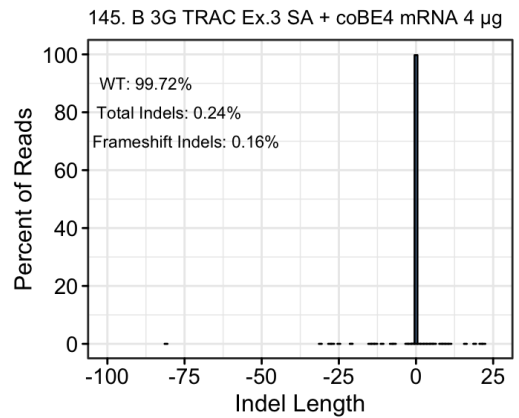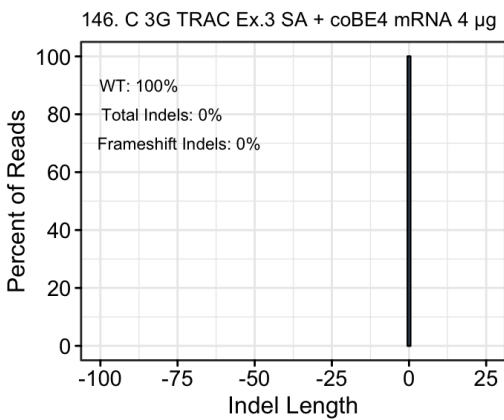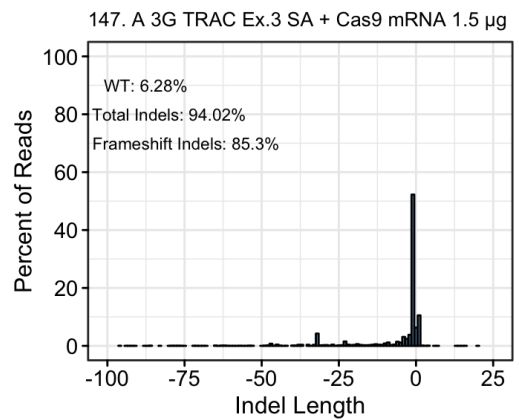

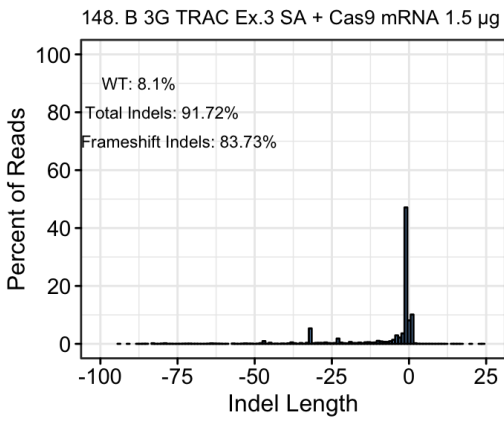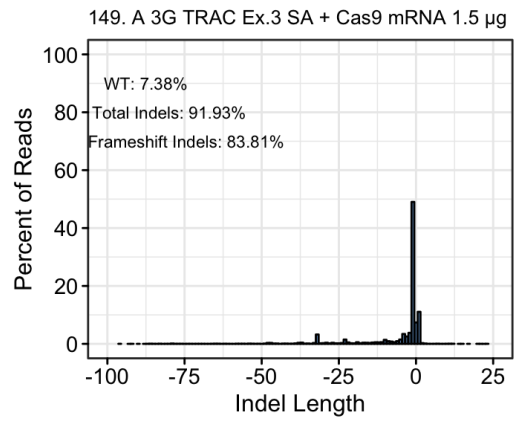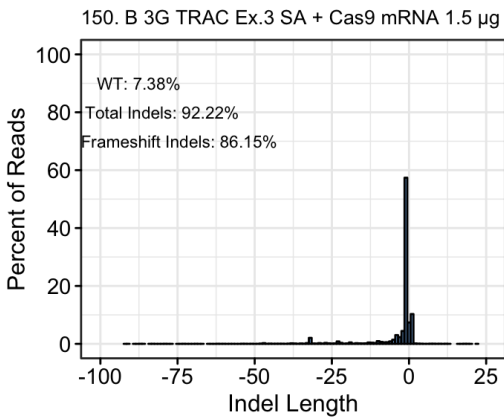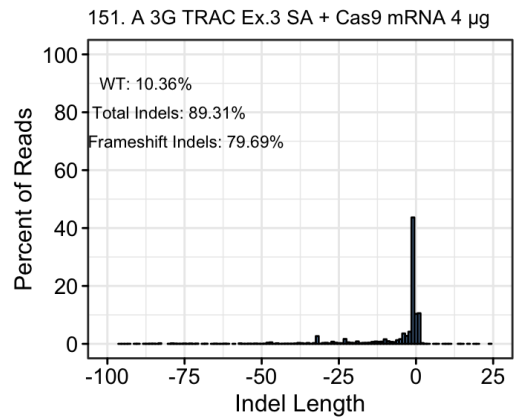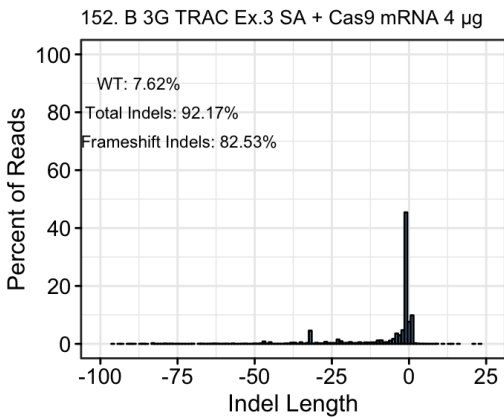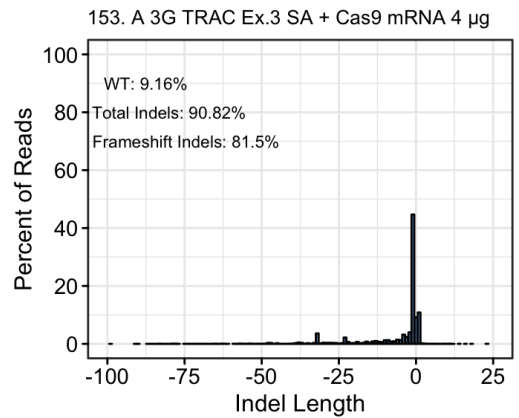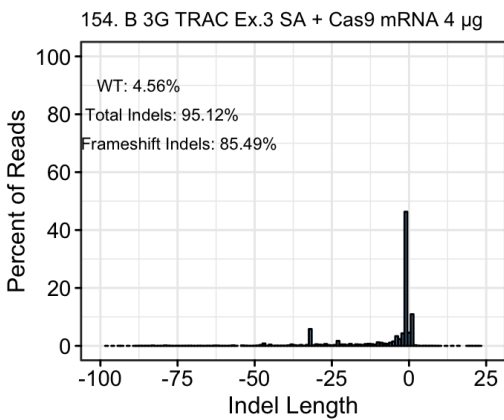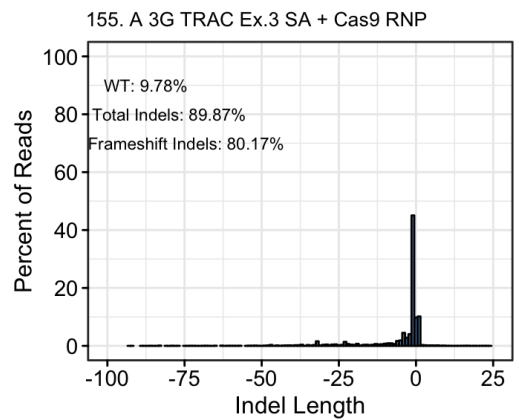

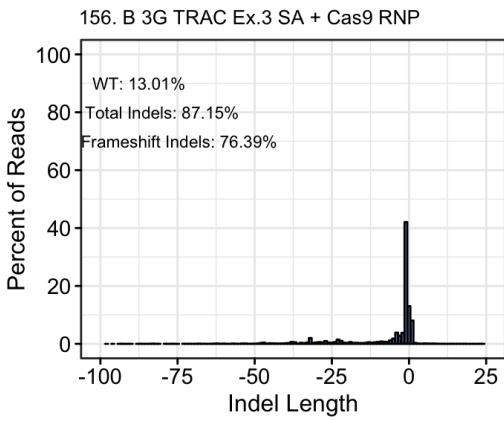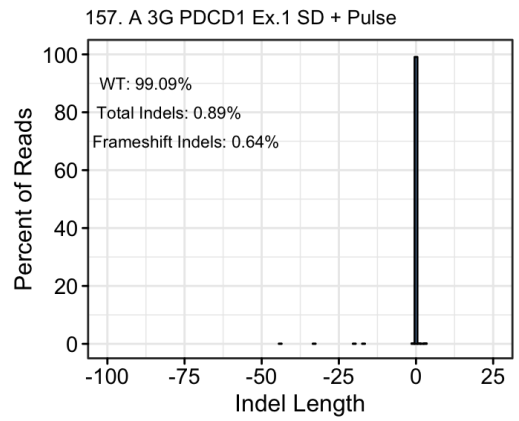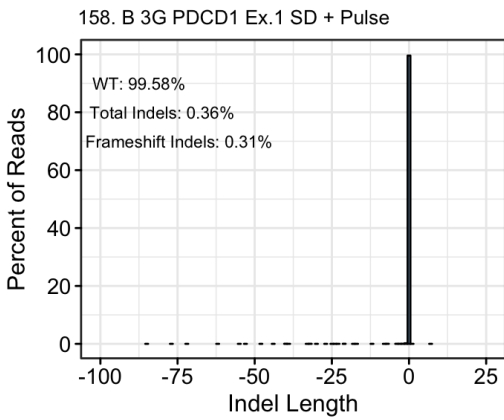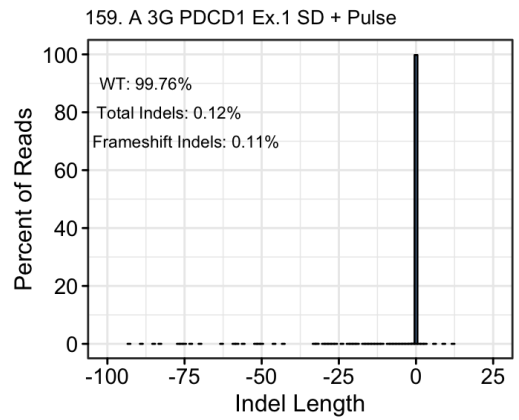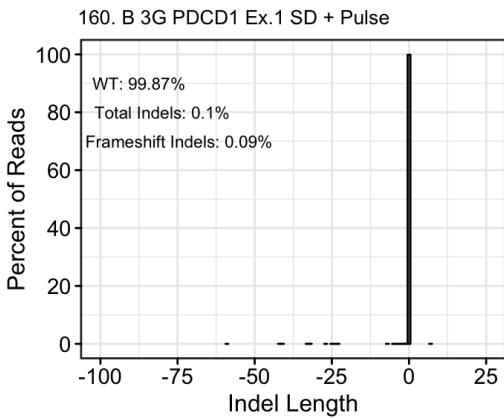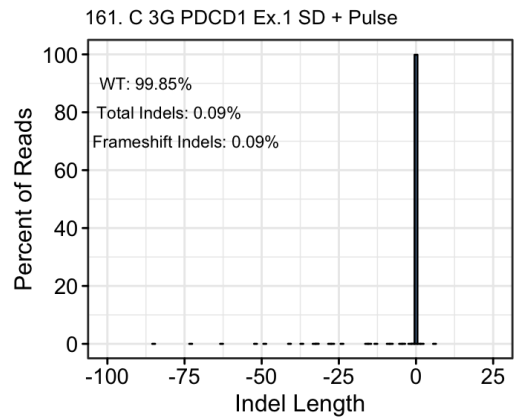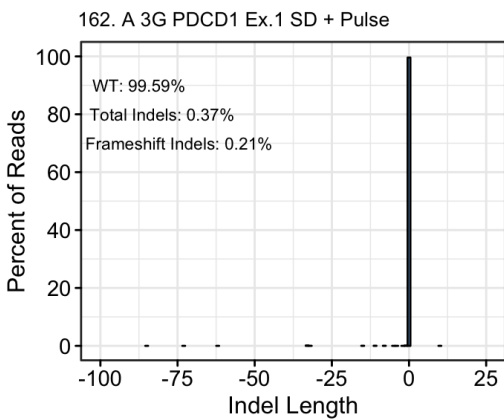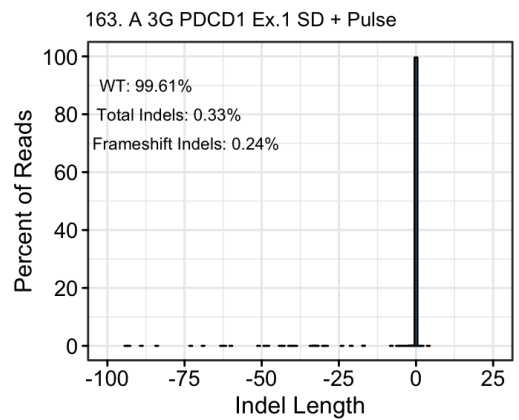

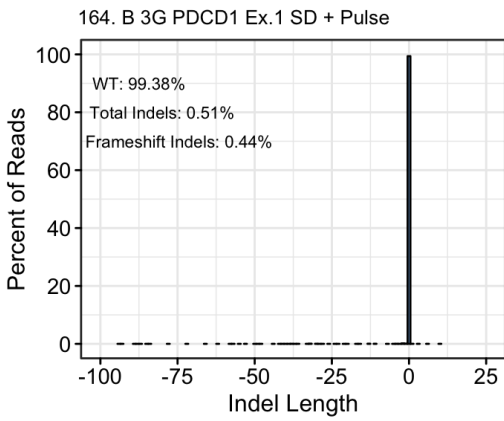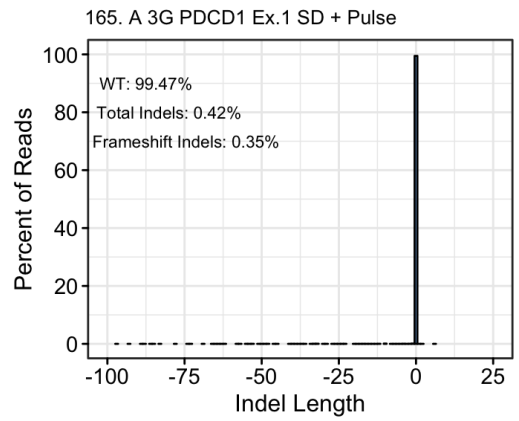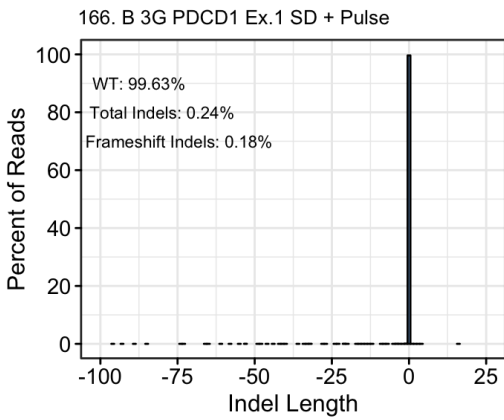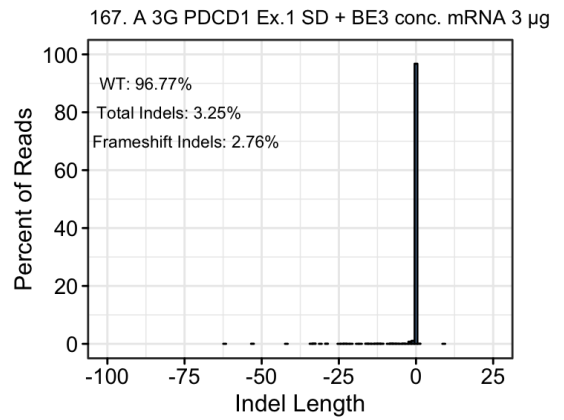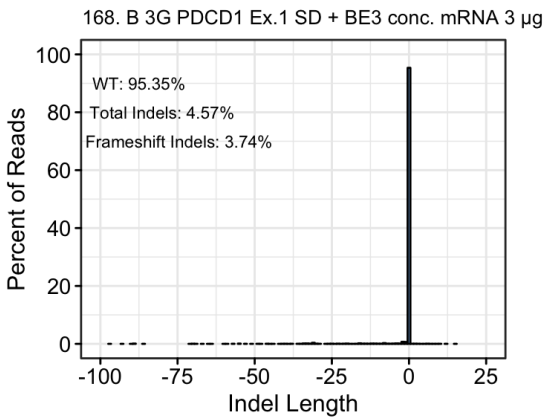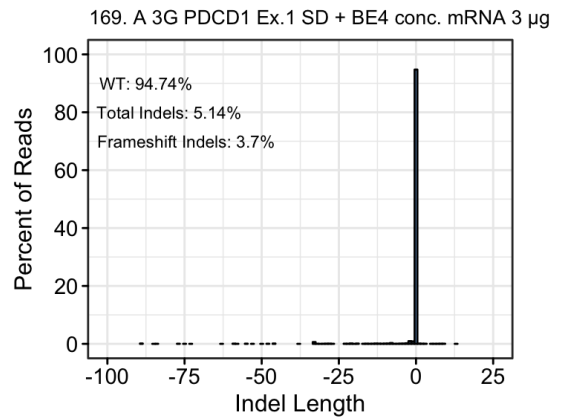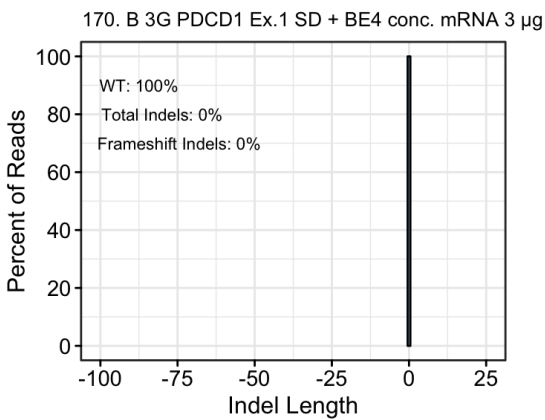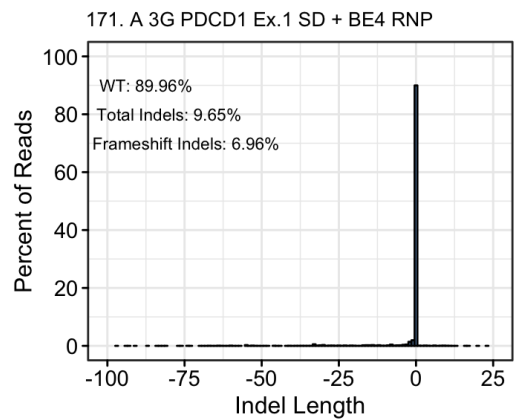

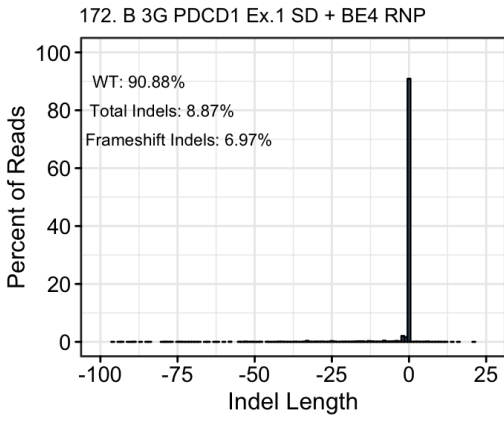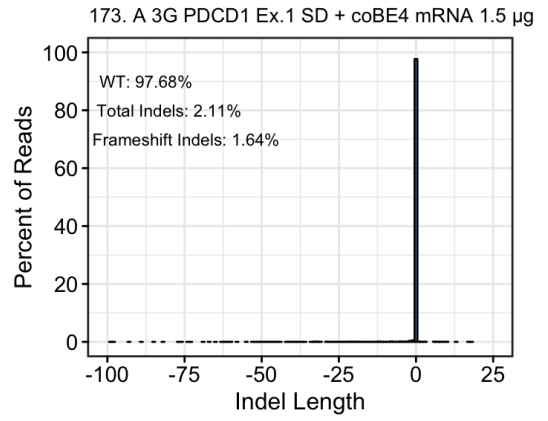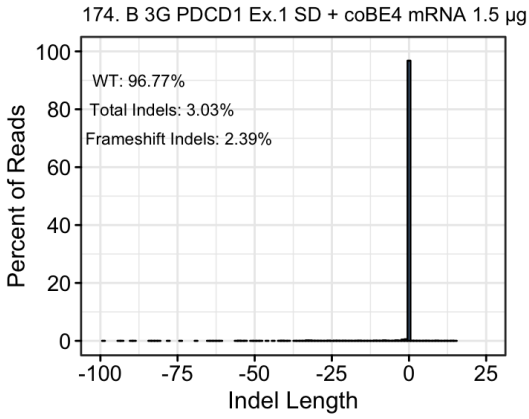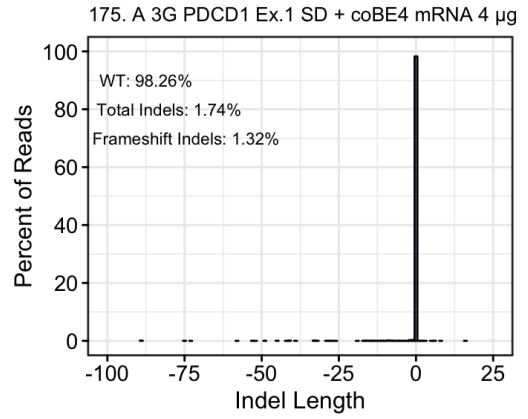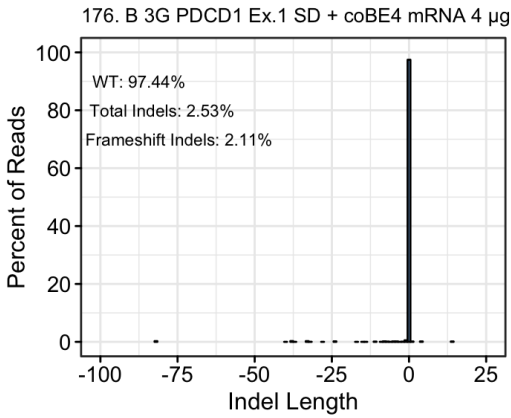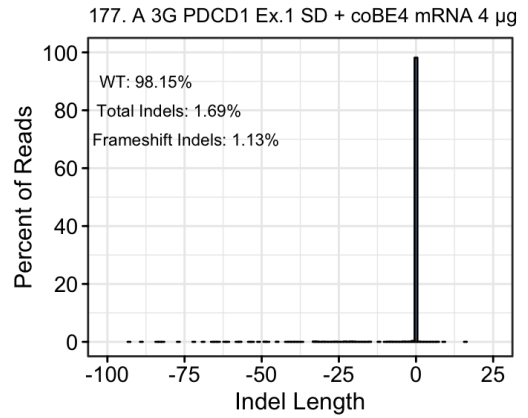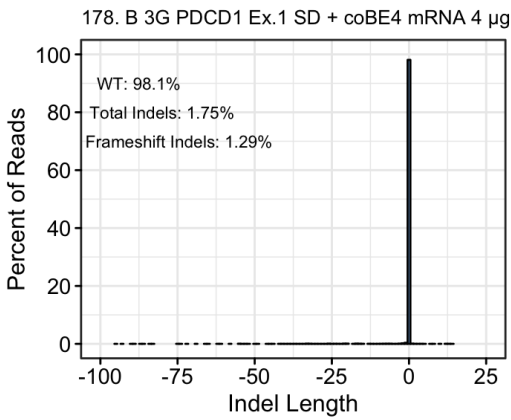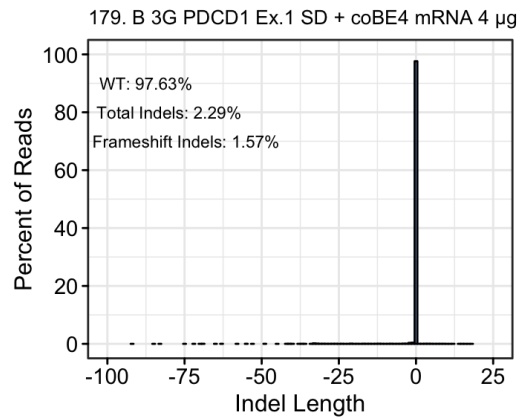

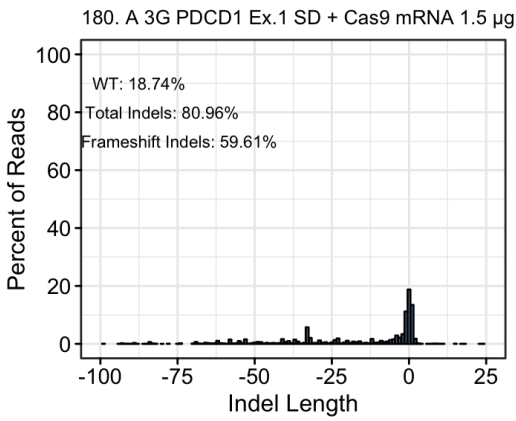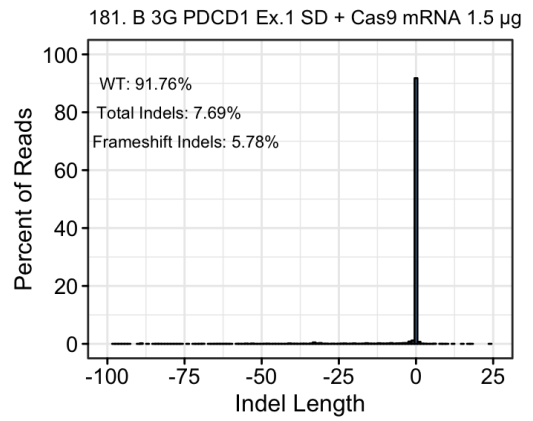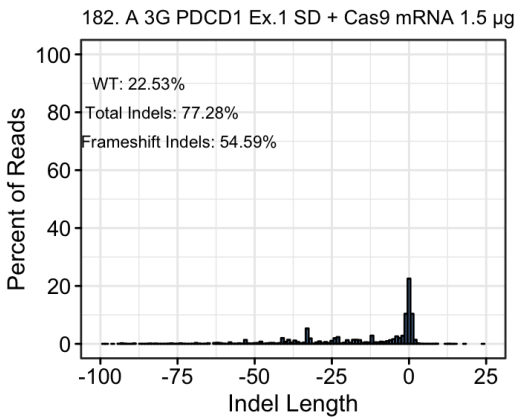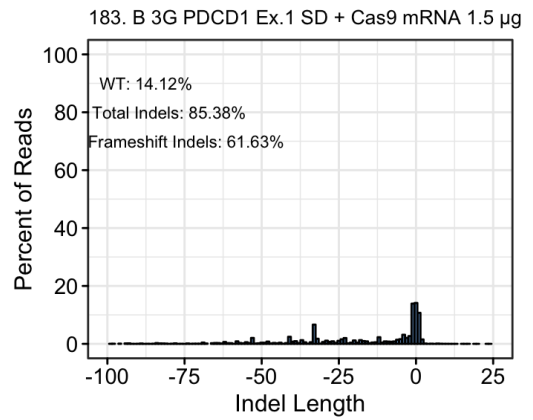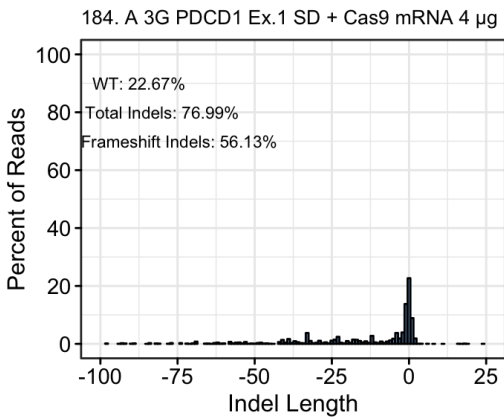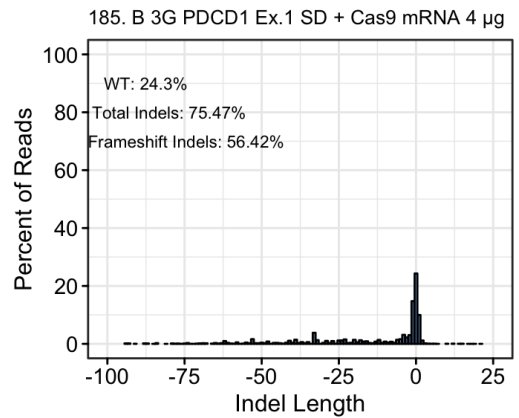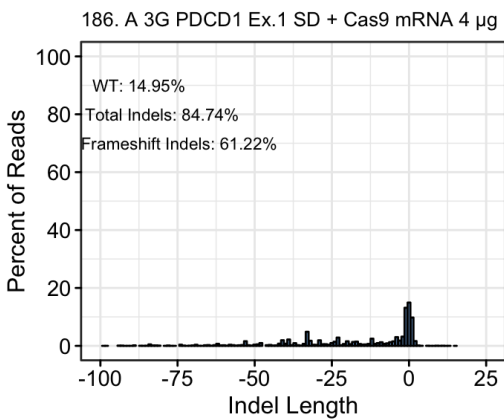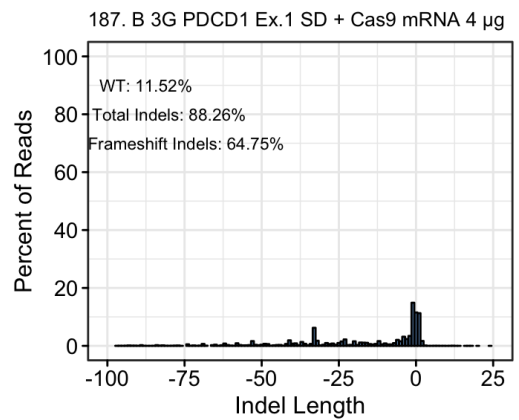



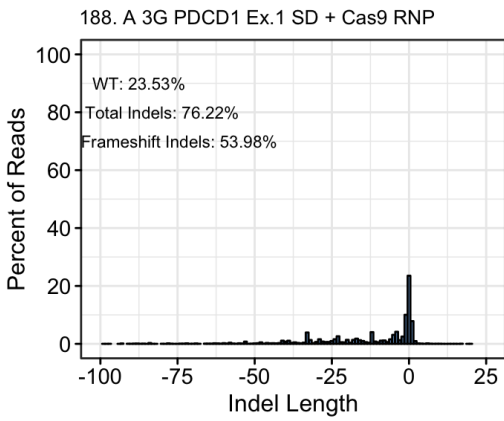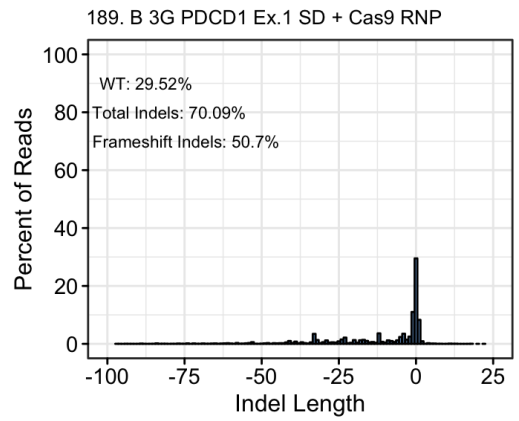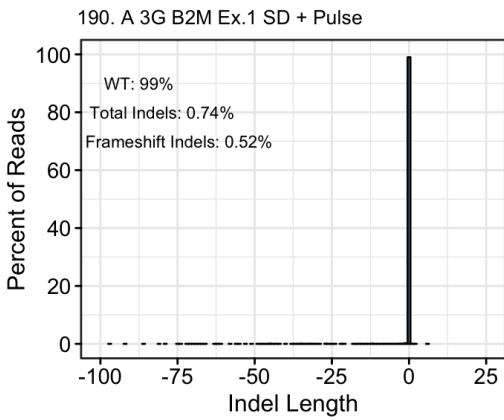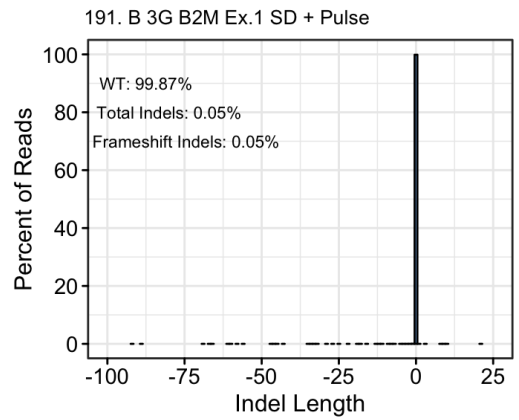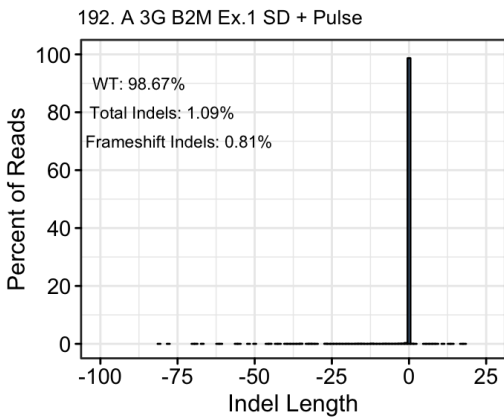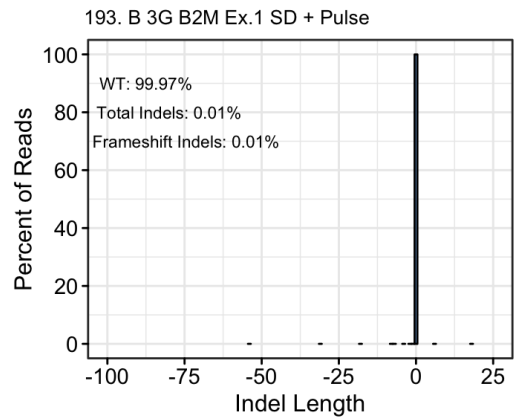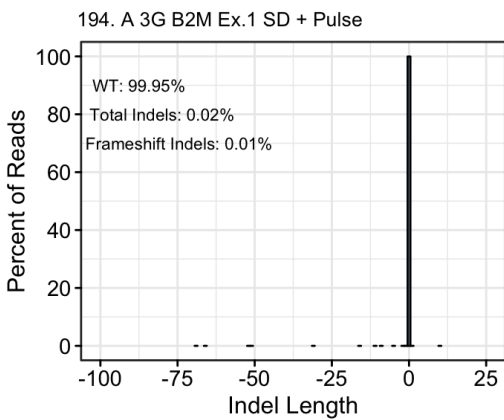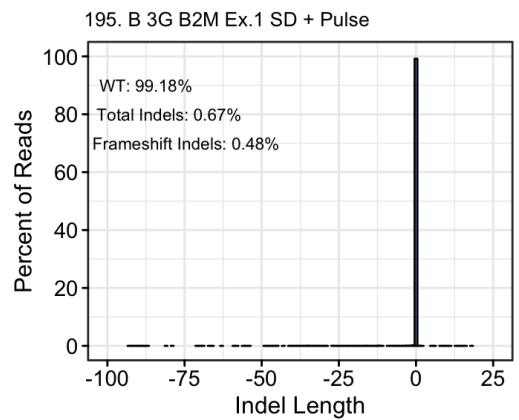

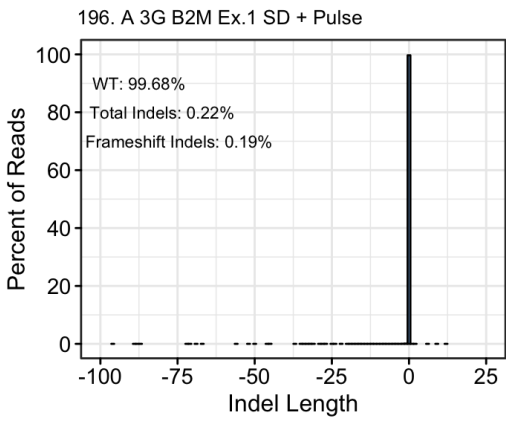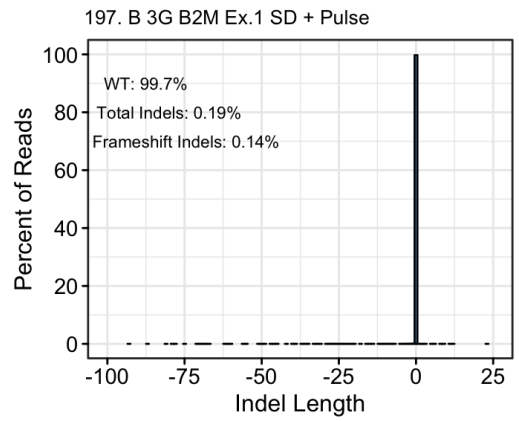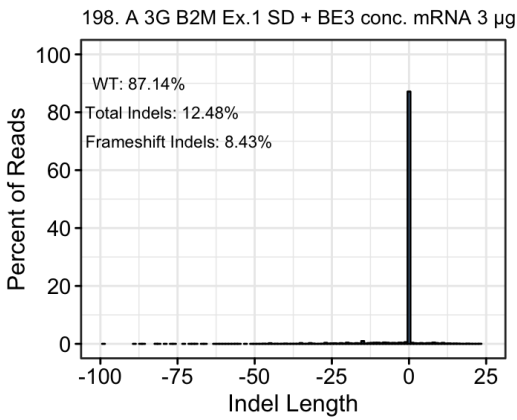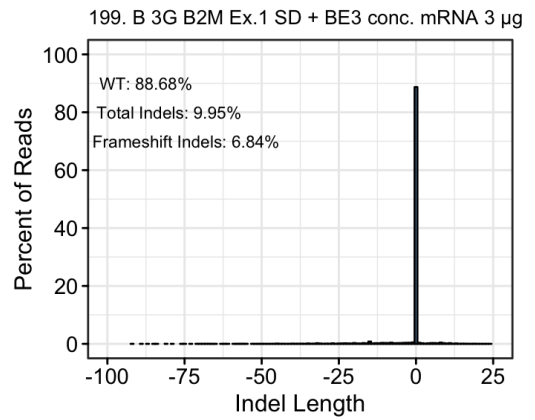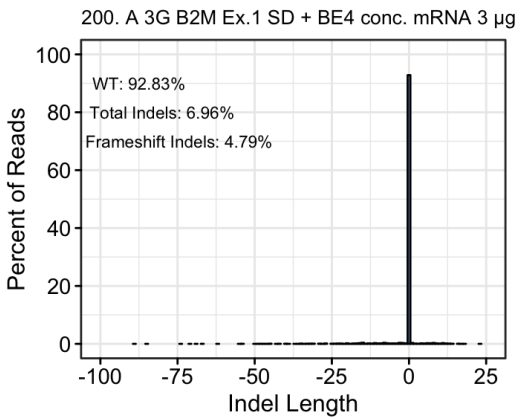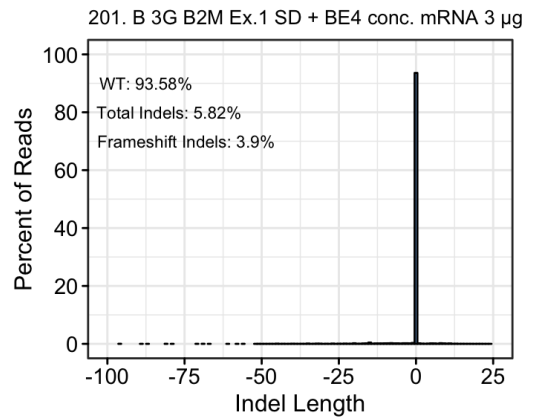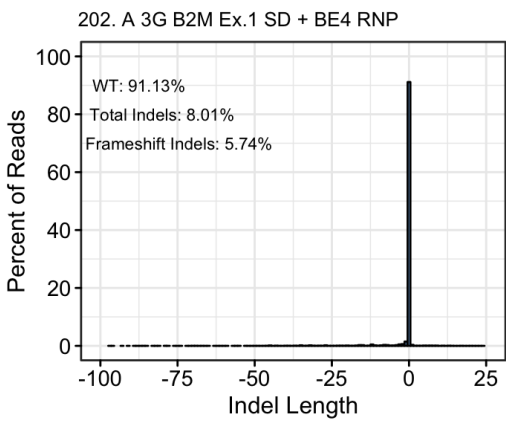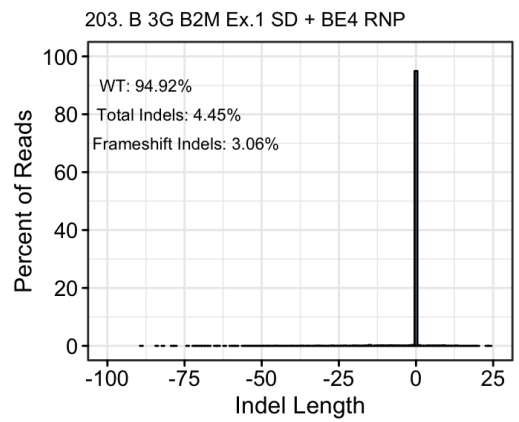

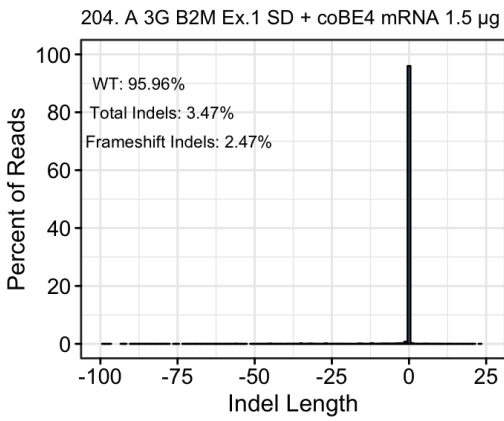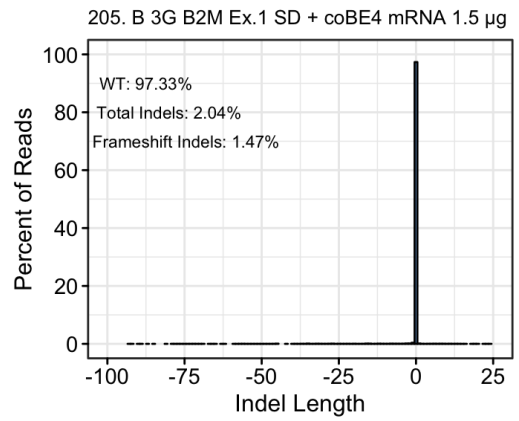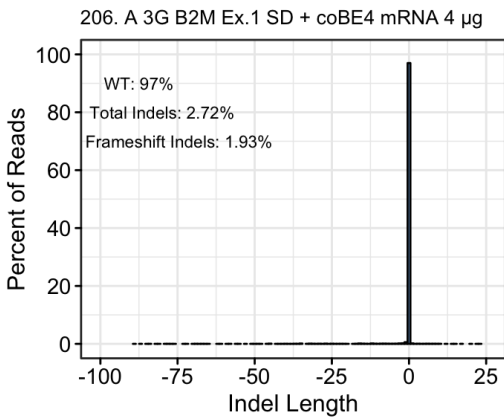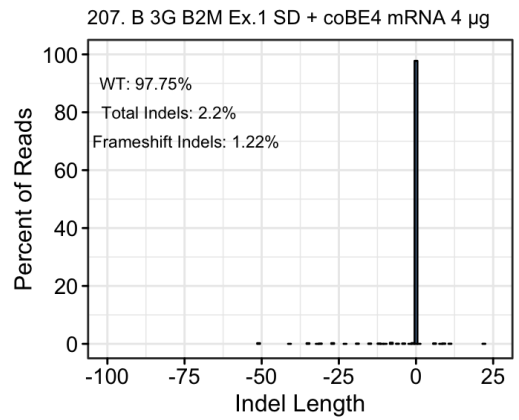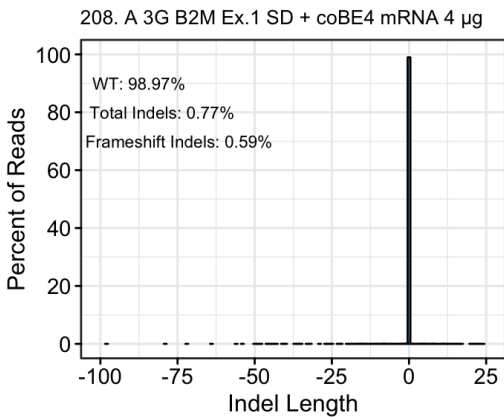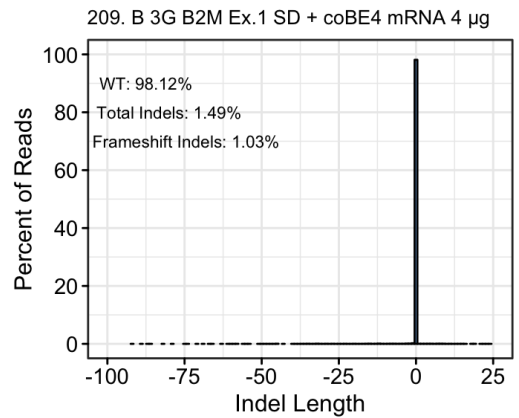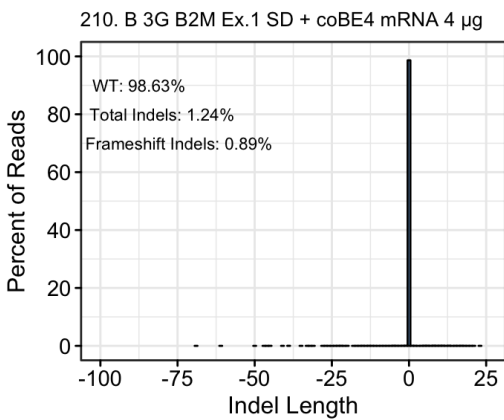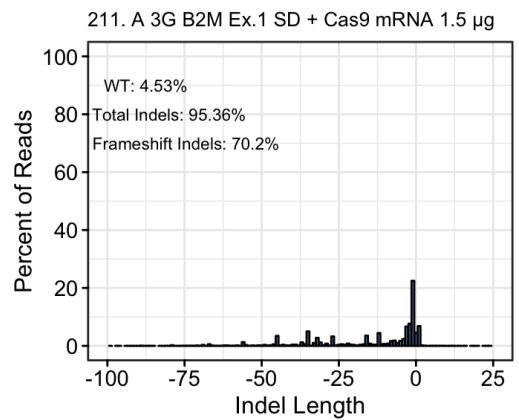

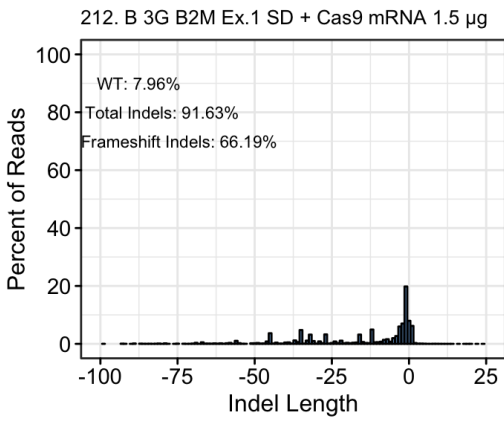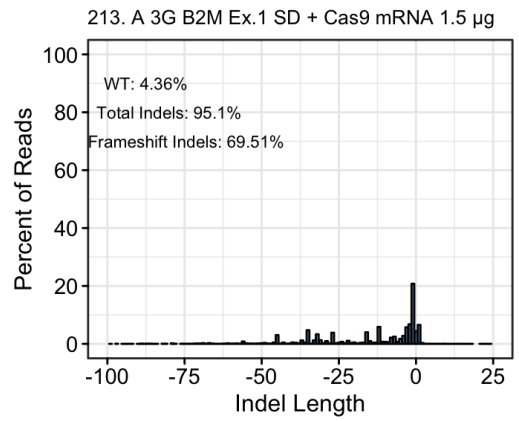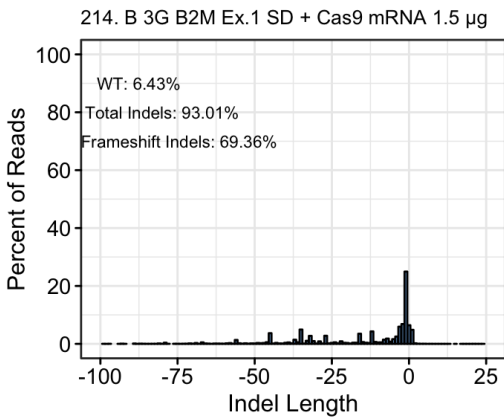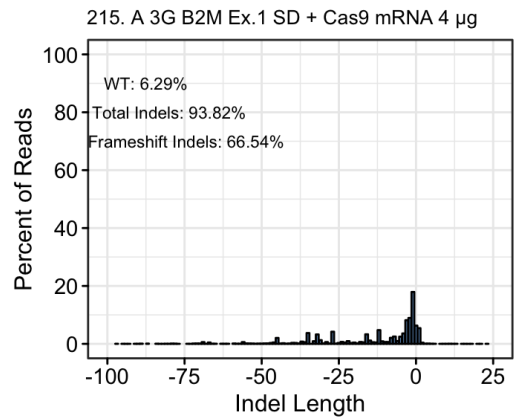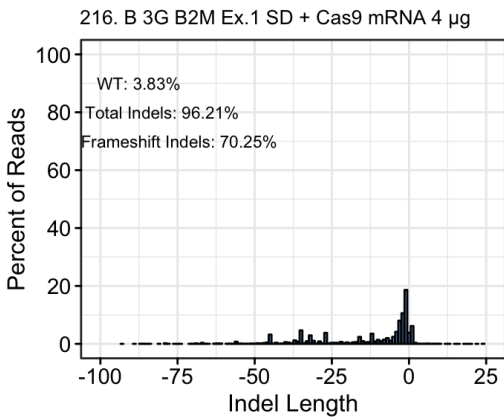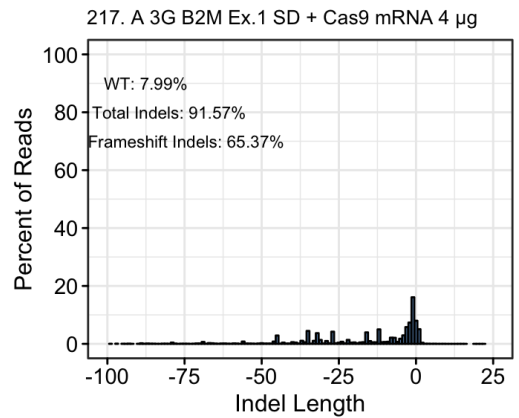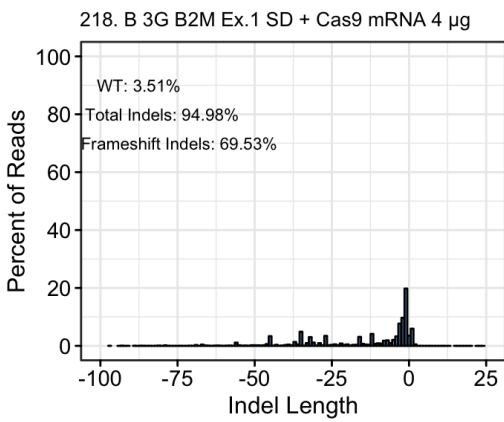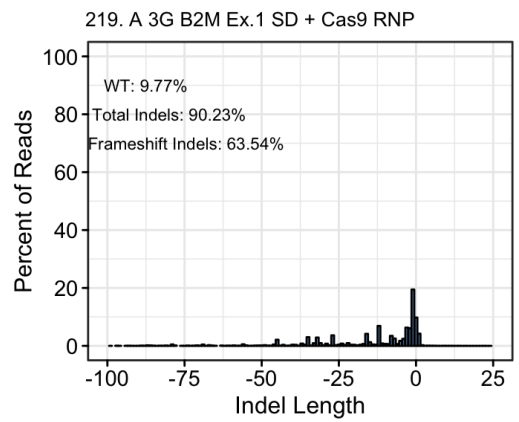

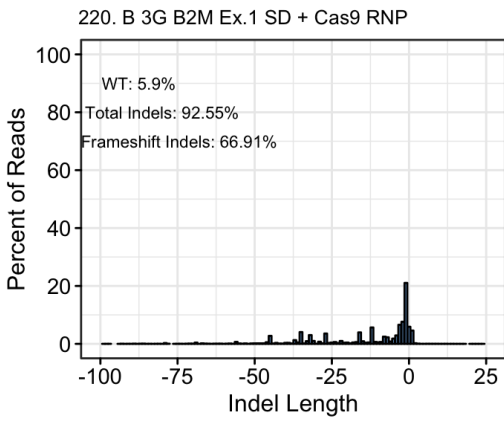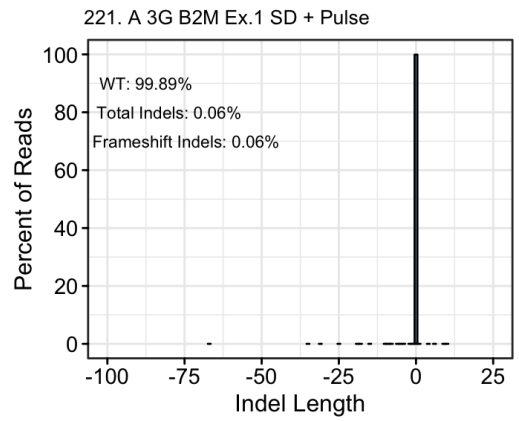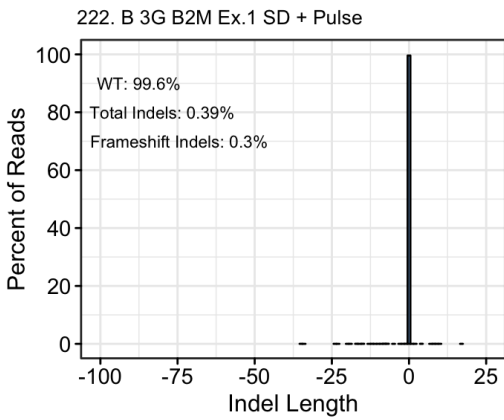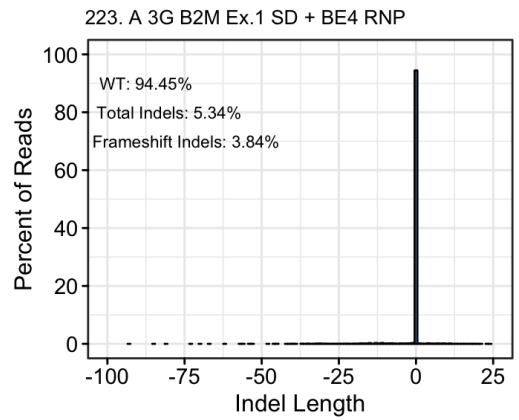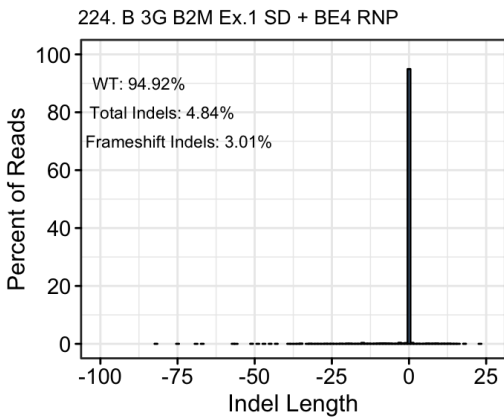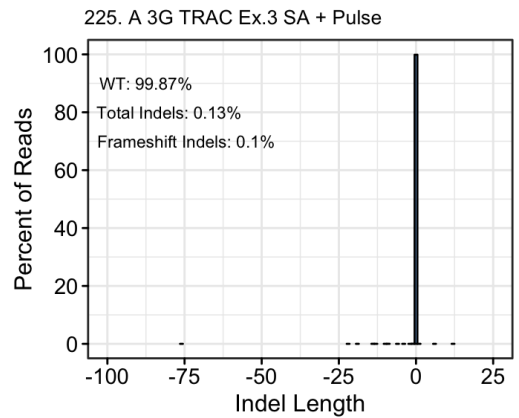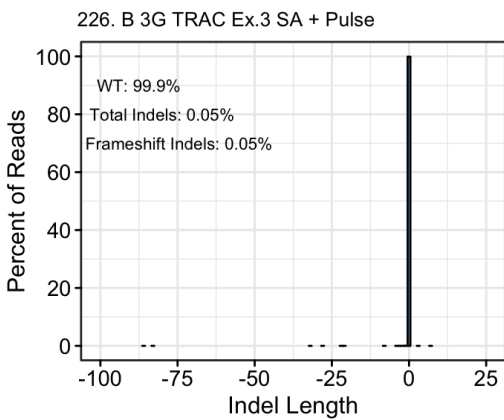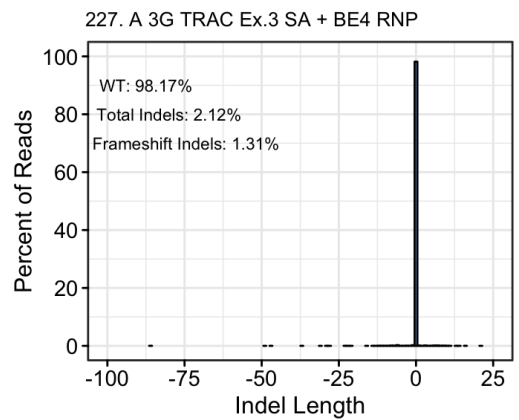

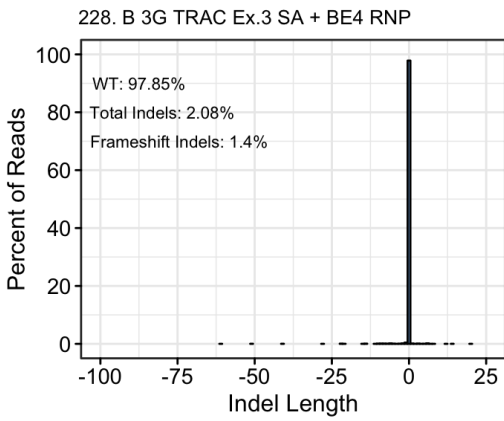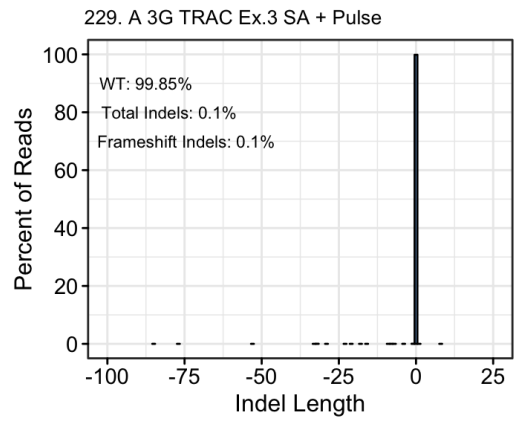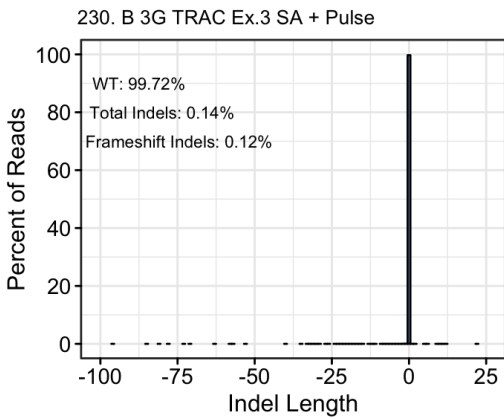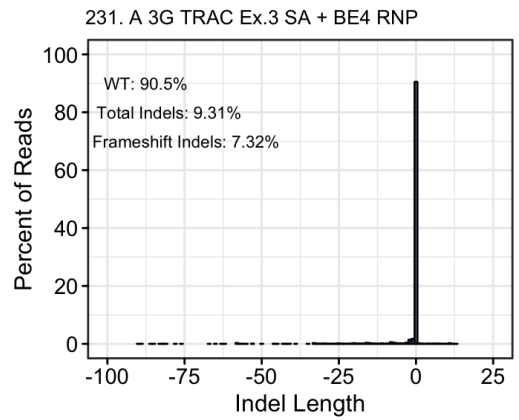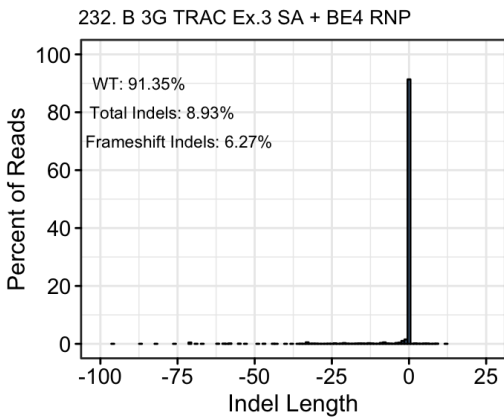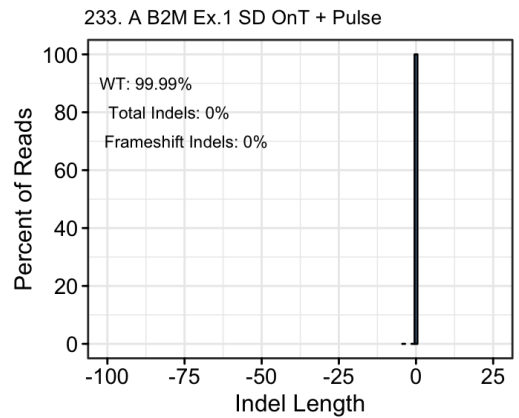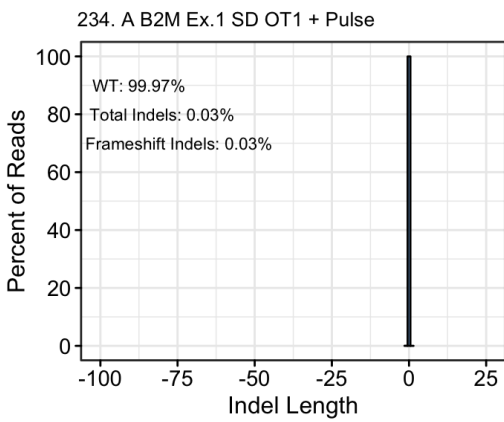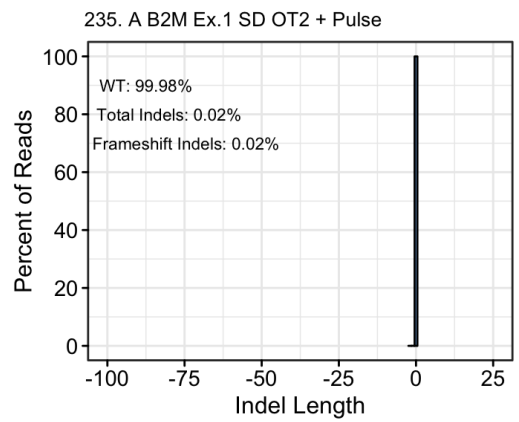

236. A B2M Ex.1 SD OT3 + Pulse

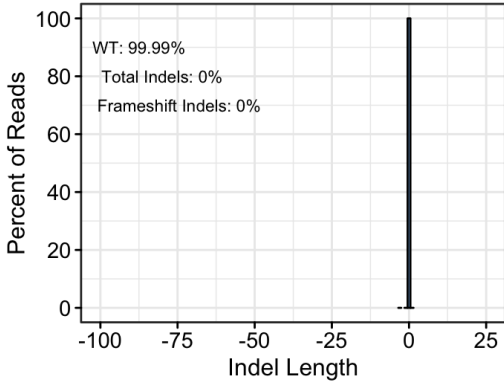

237. A B2M Ex.1 SD OT4 + Pulse

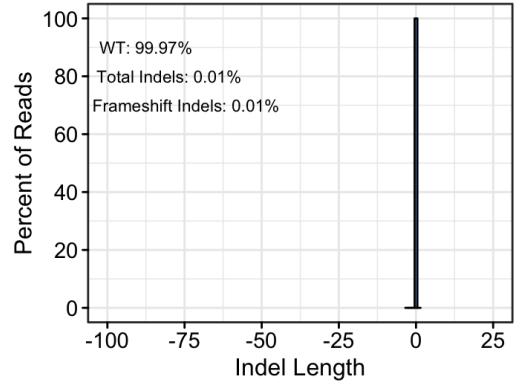

238. A B2M Ex.1 SD OT5 + Pulse

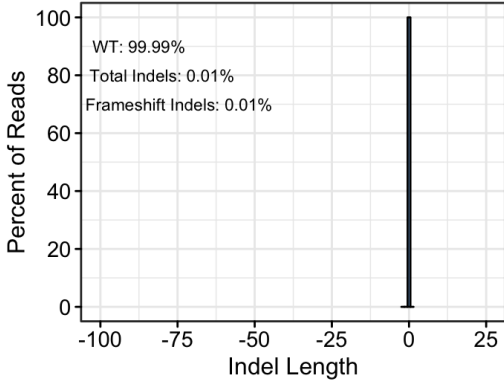

239. A B2M Ex.1 SD OT6 + Pulse

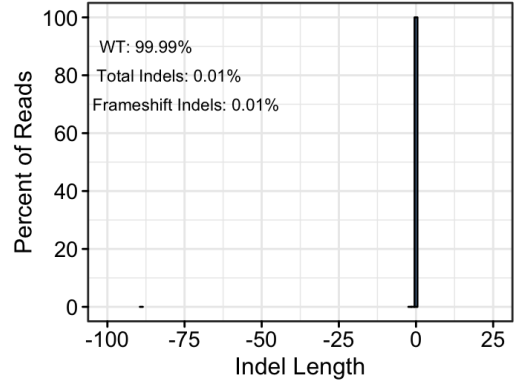

240. A B2M Ex.1 SD OT7 + Pulse

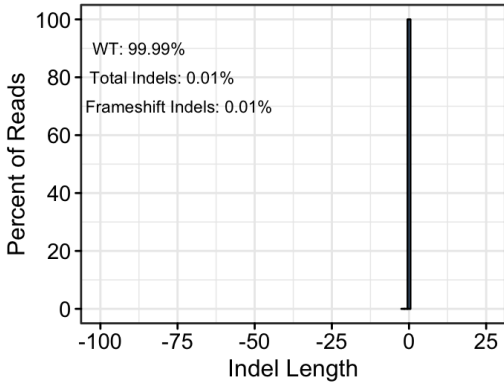

241. A B2M Ex.1 SD OT8 + Pulse

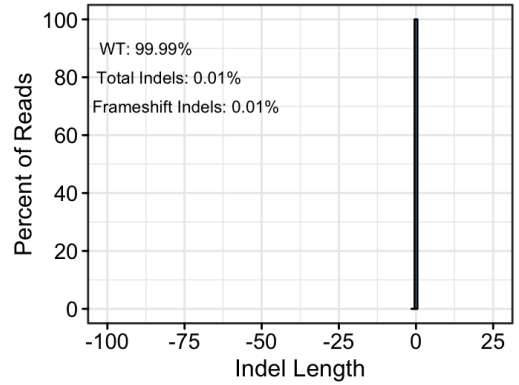

242. A B2M Ex.1 SD OT9 + Pulse

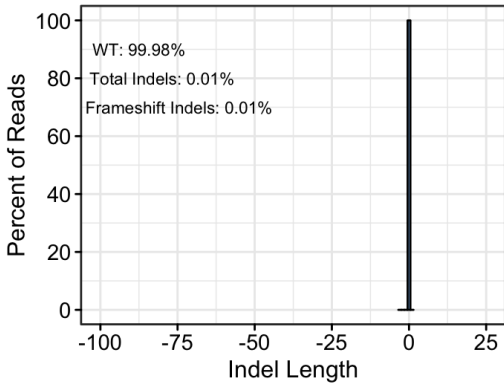

243. A B2M Ex.1 SD OT10 + Pulse

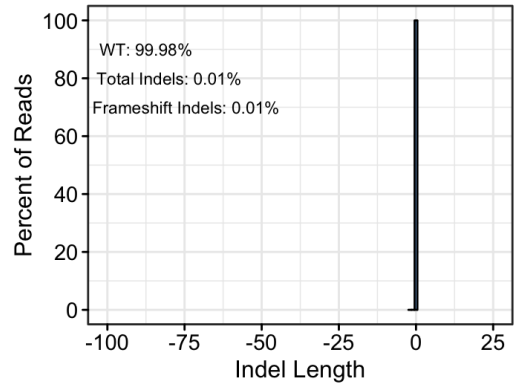

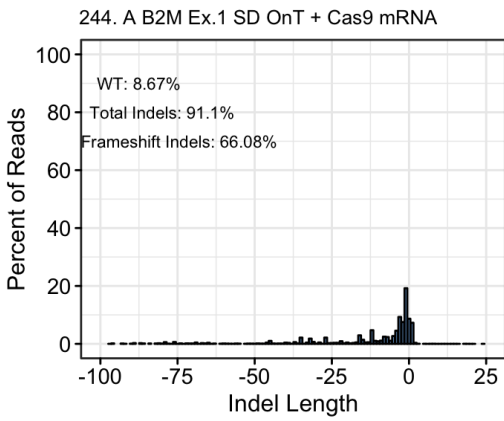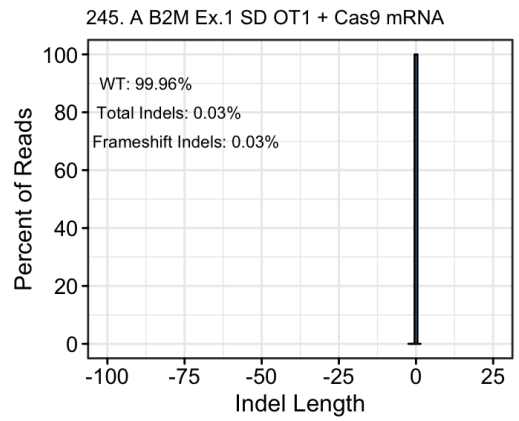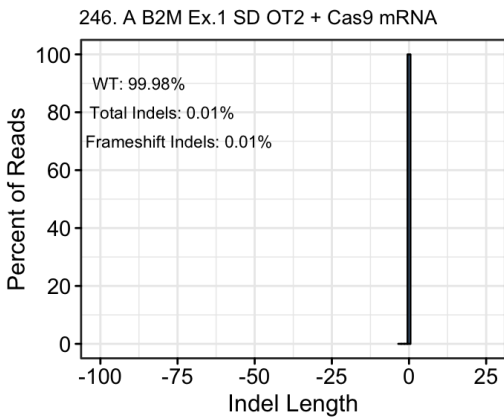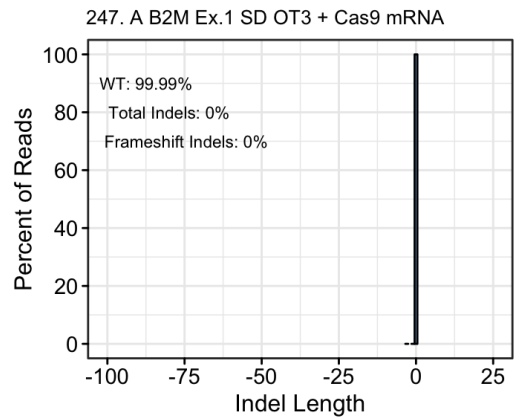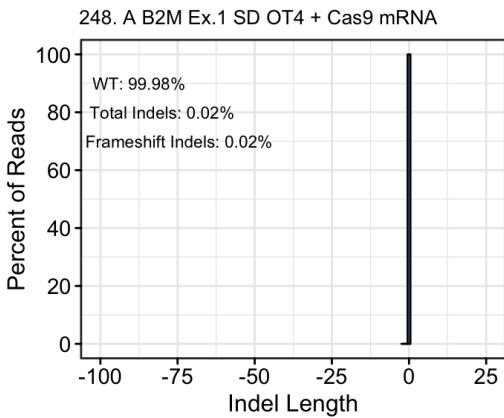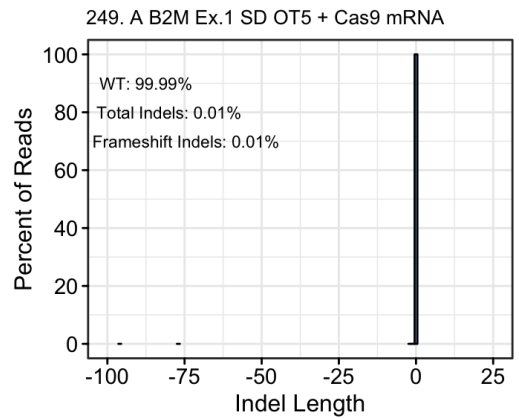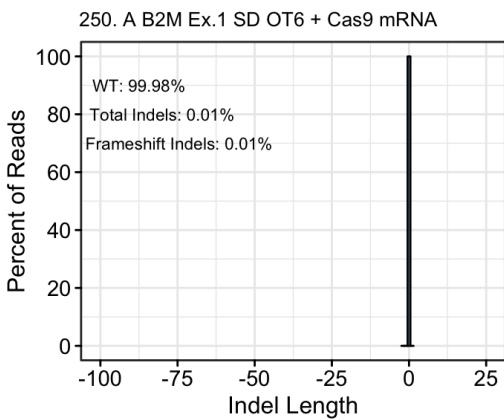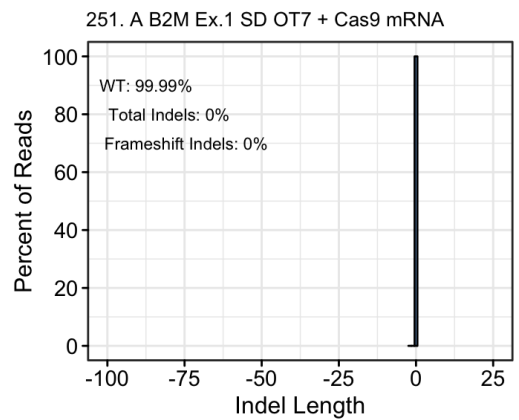



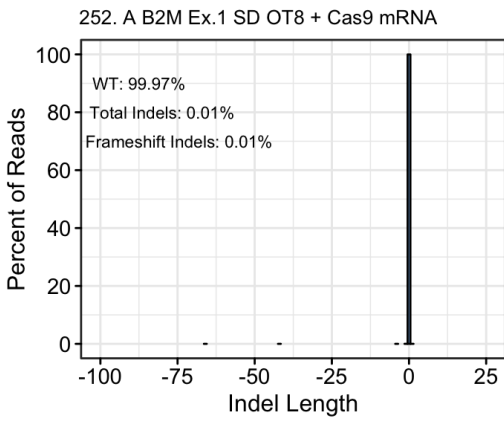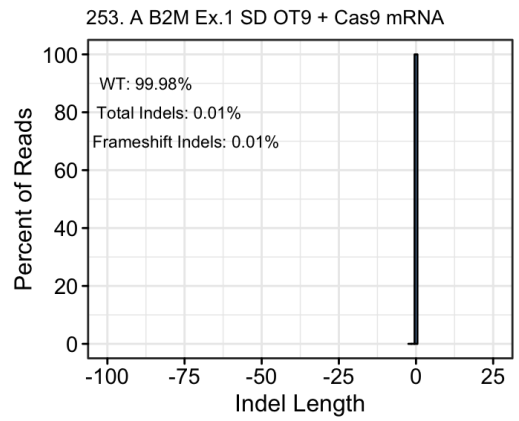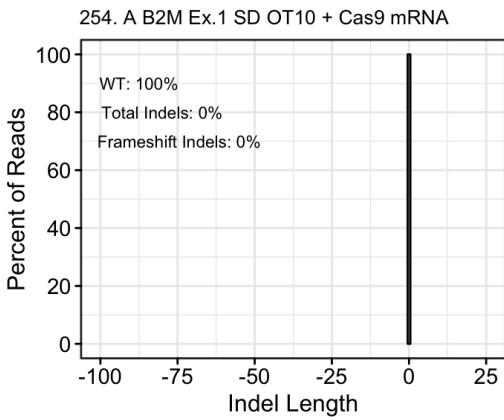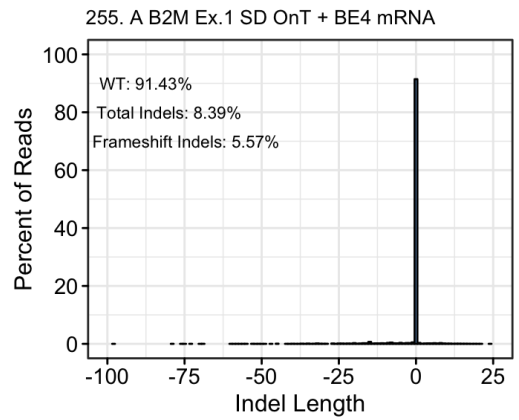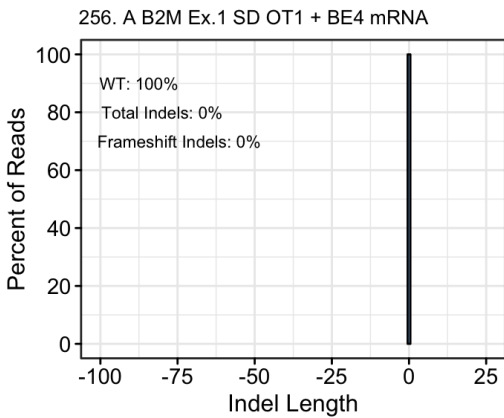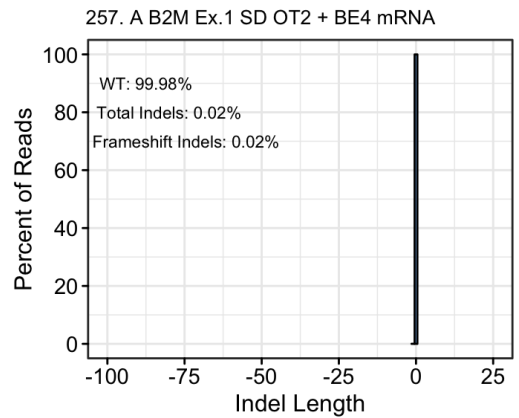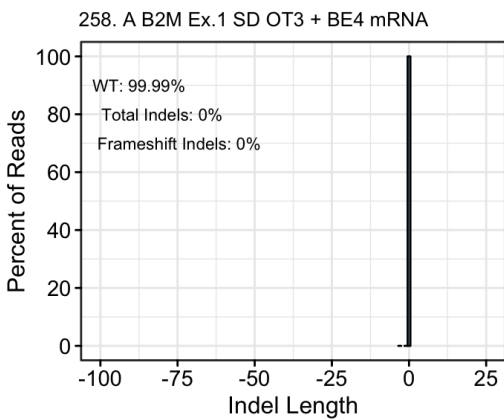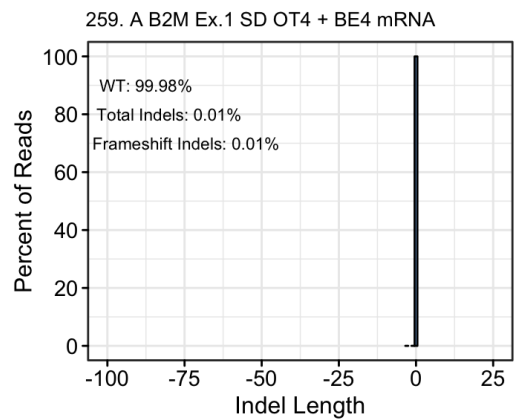

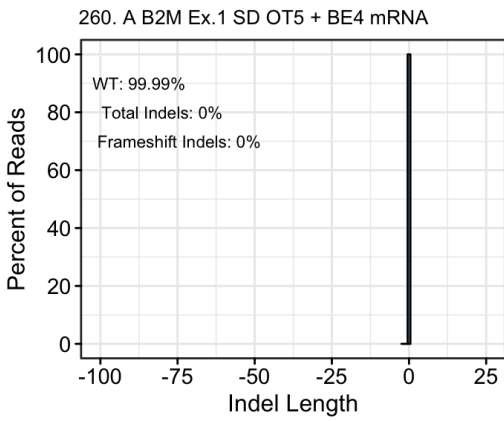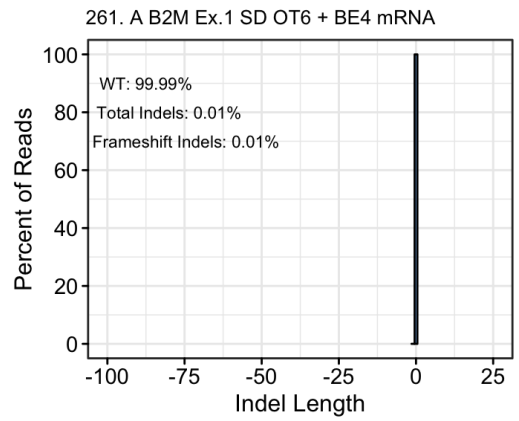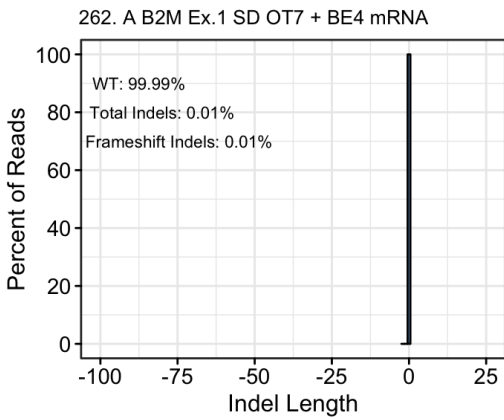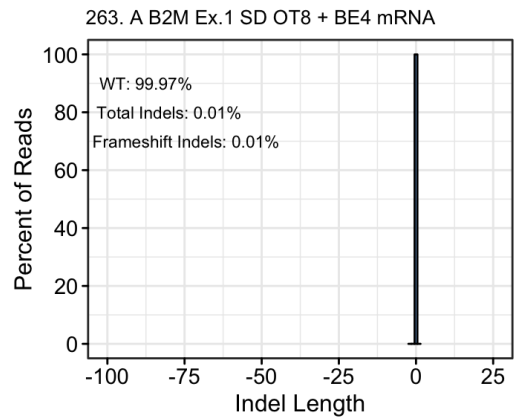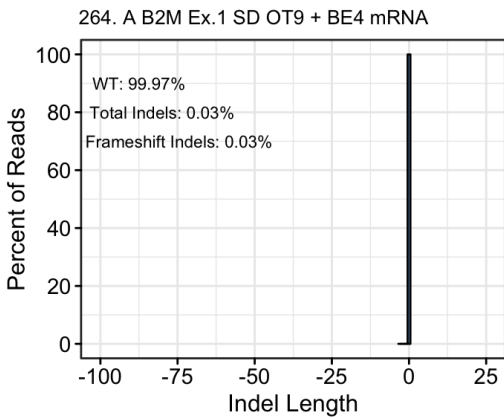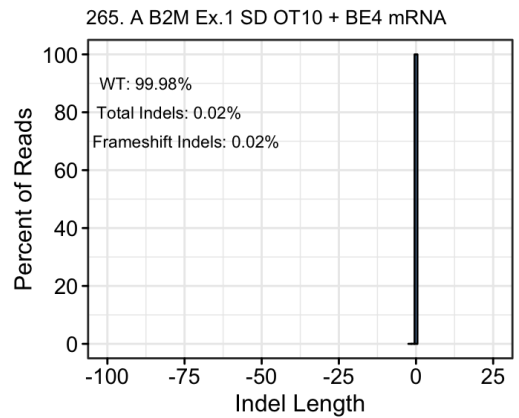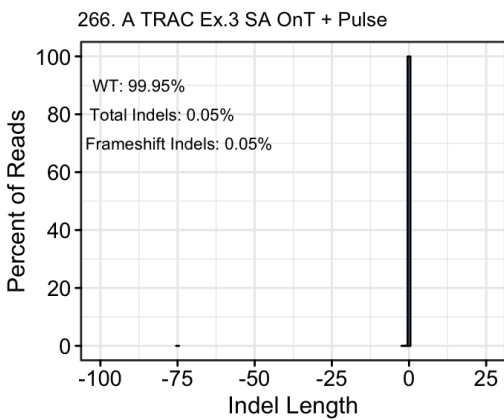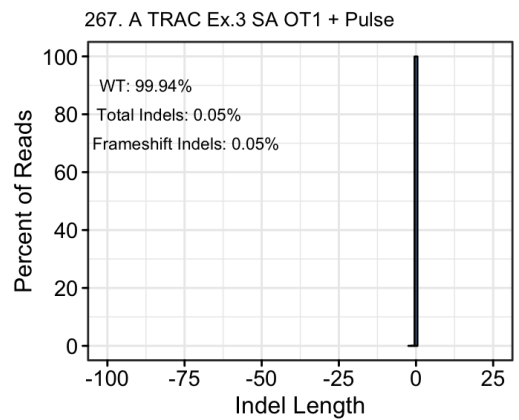

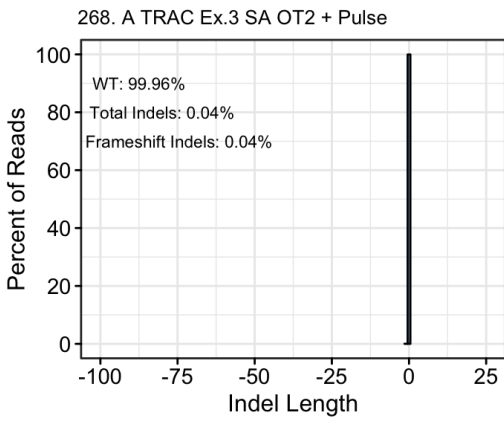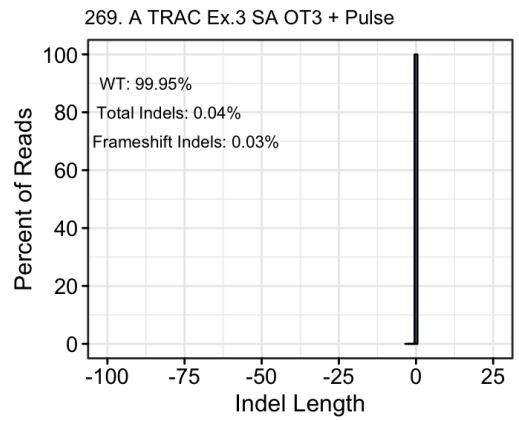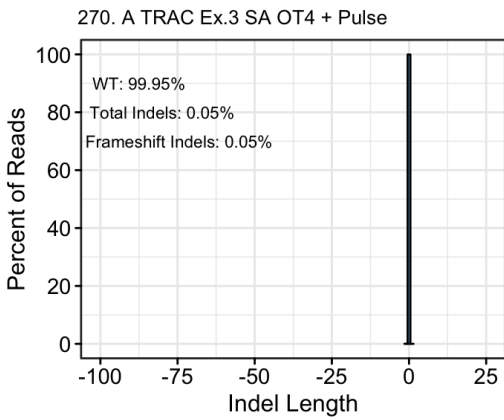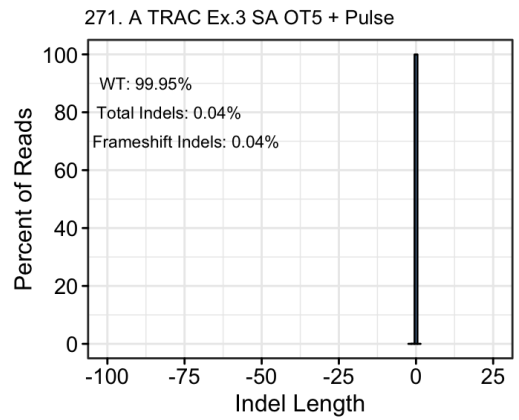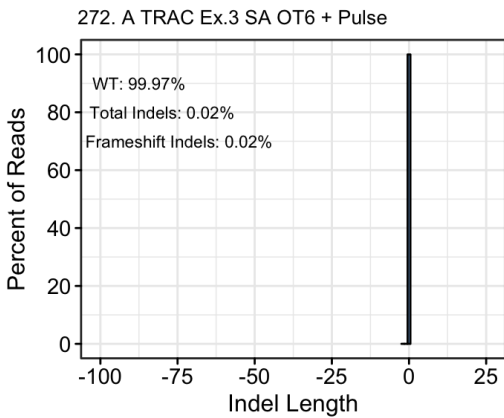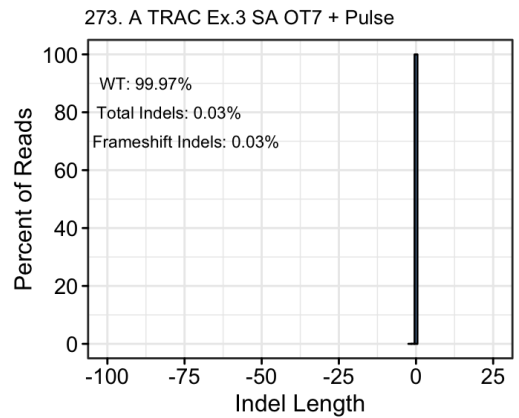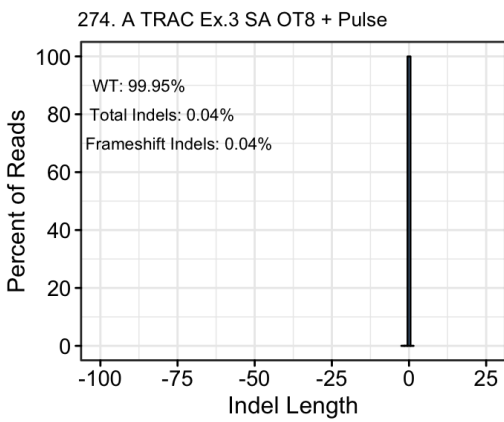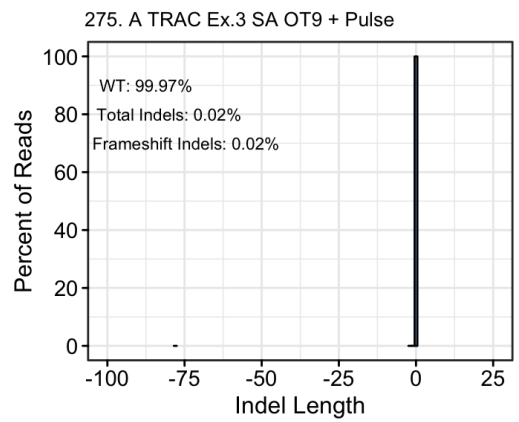

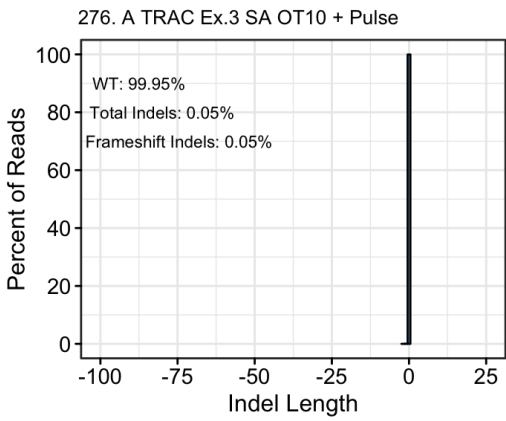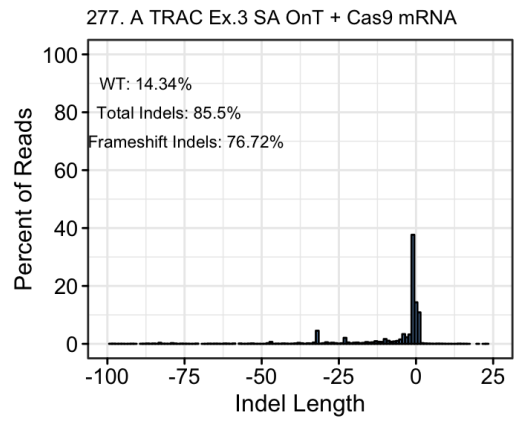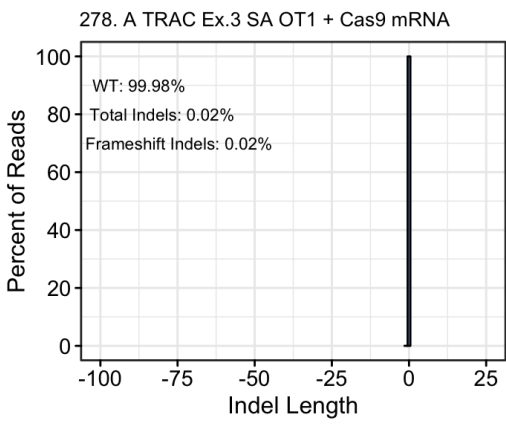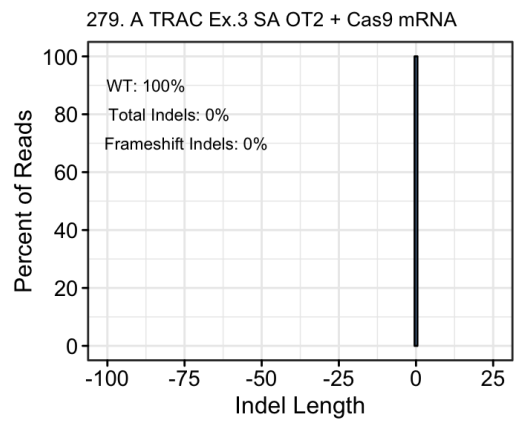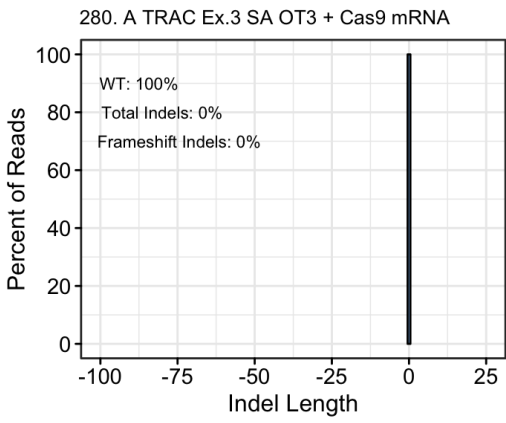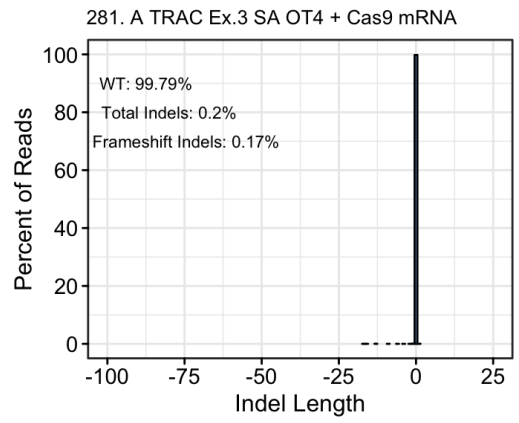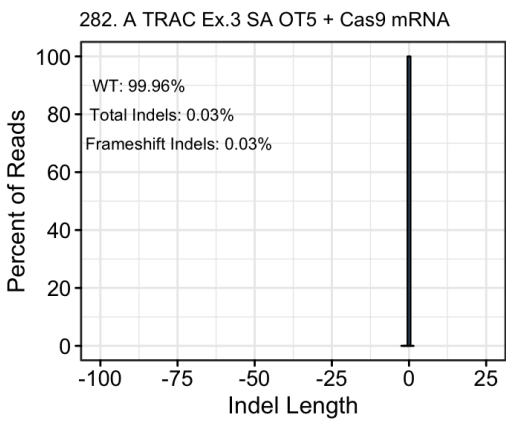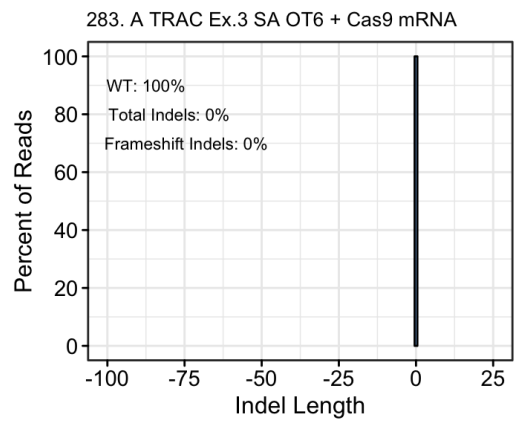

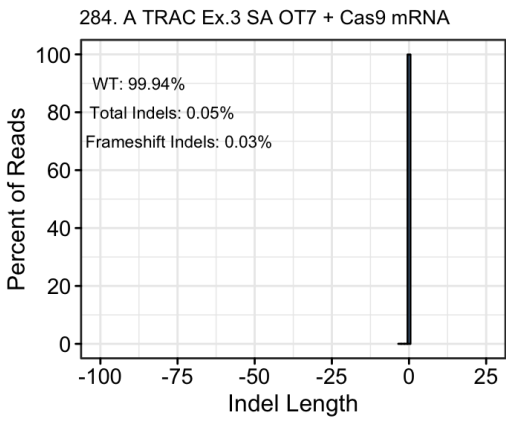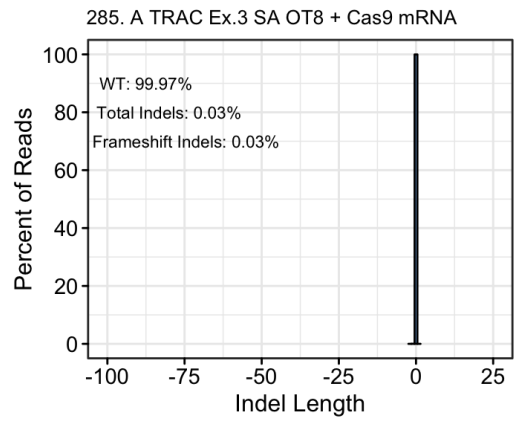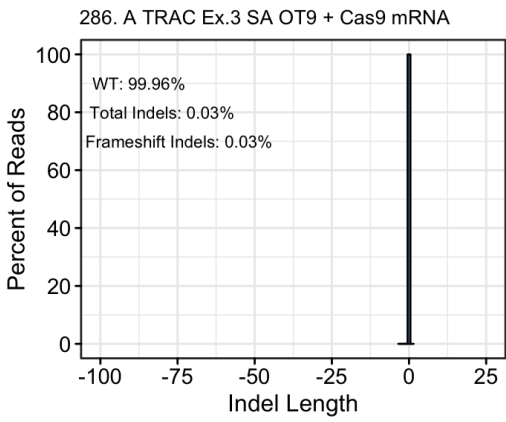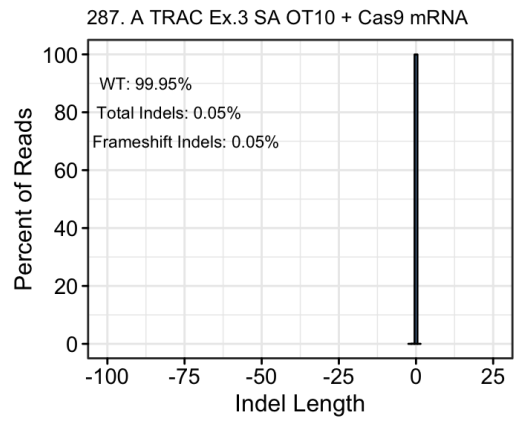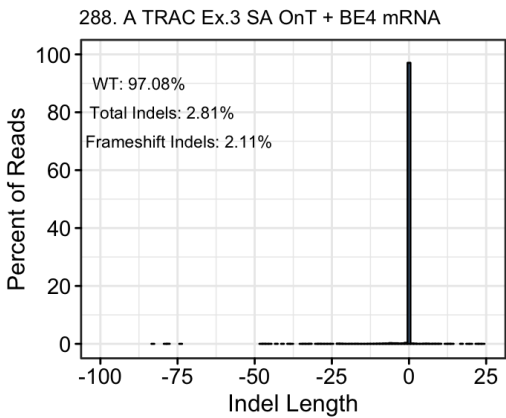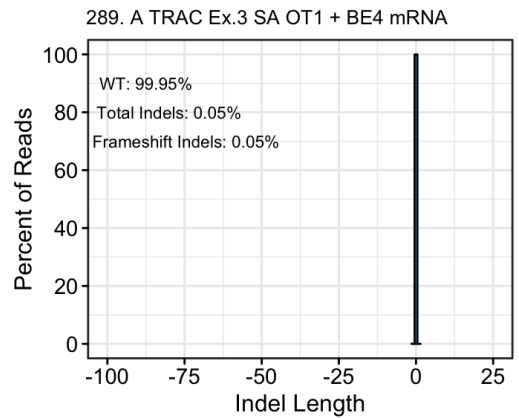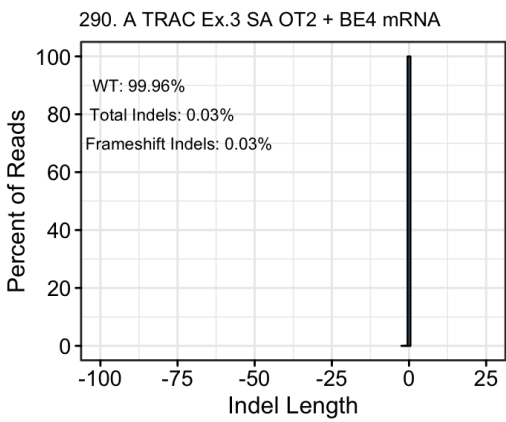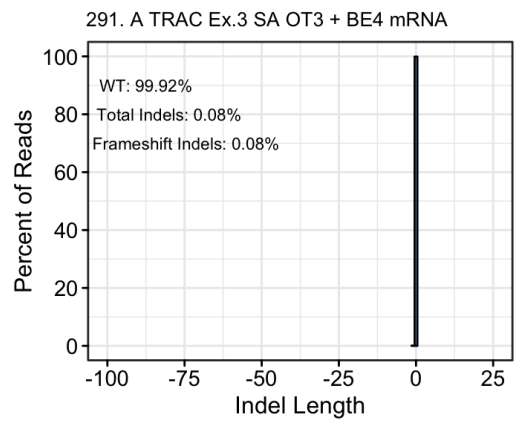

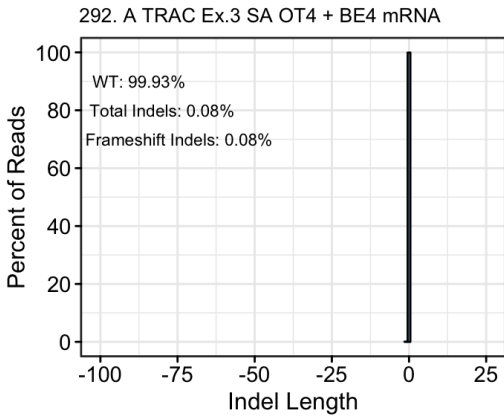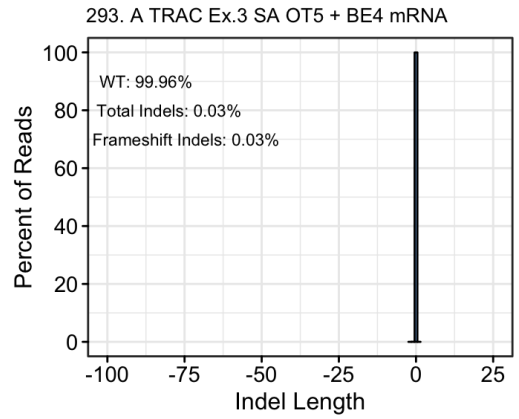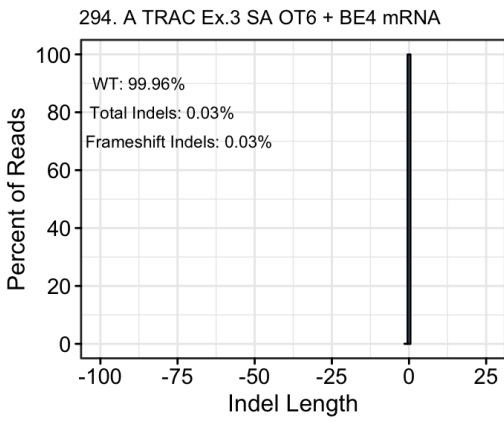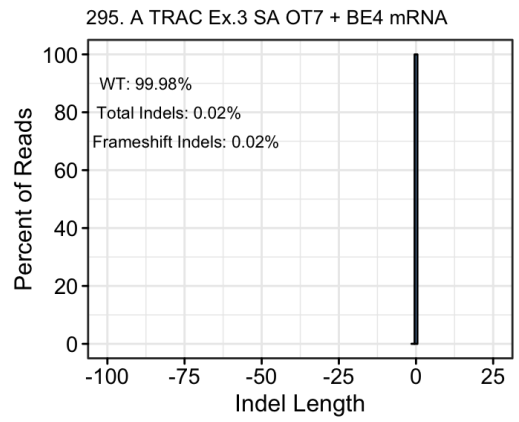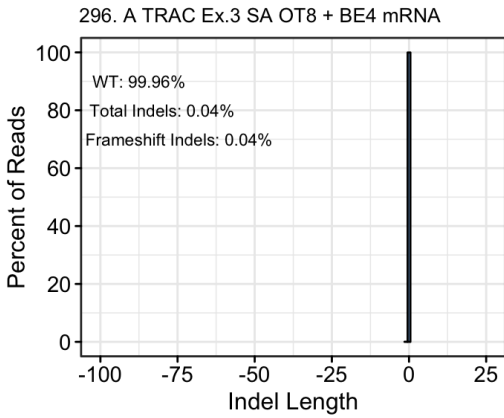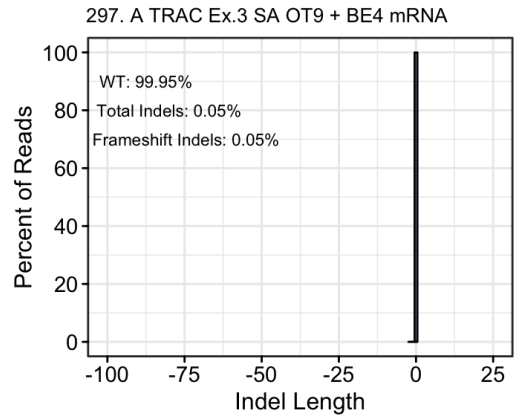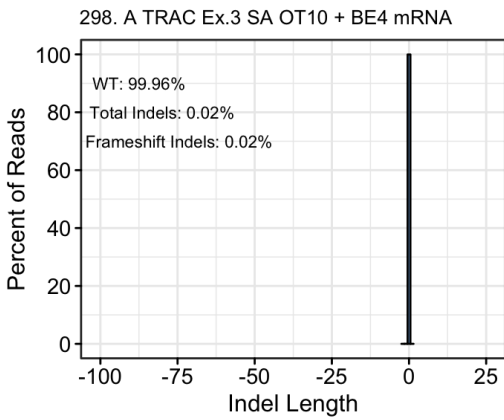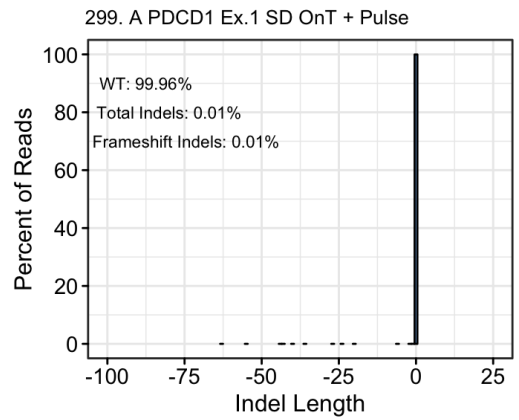

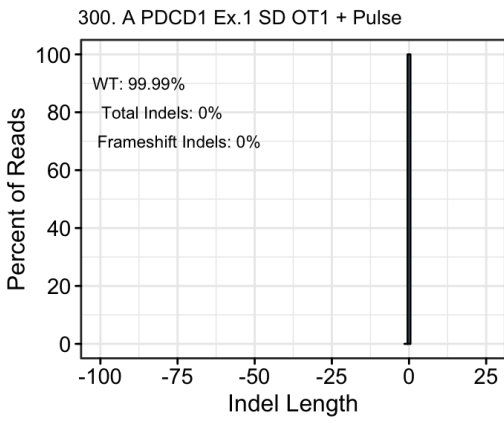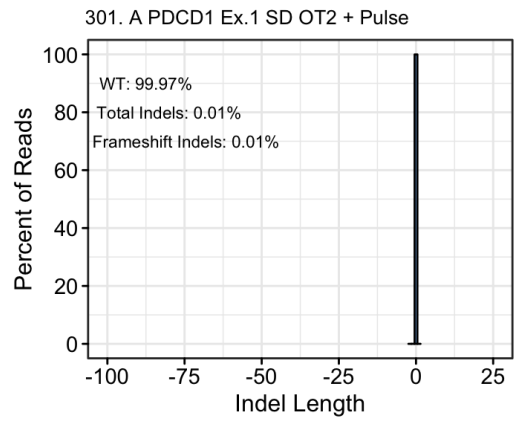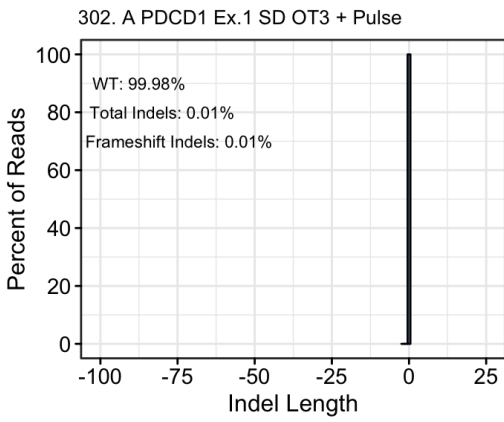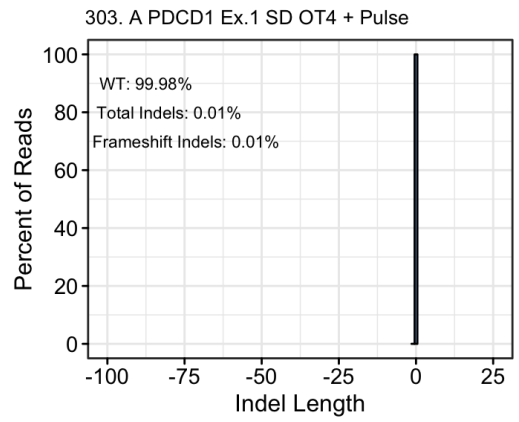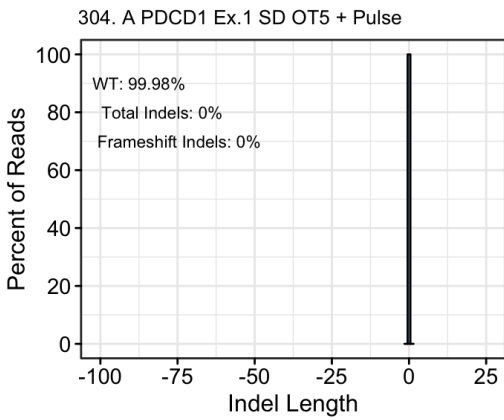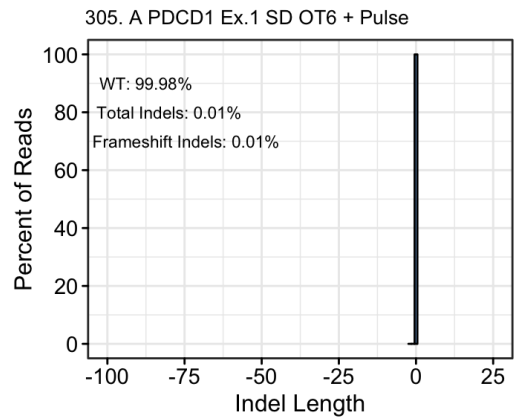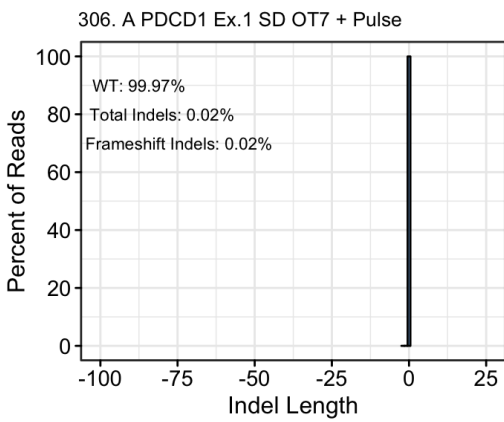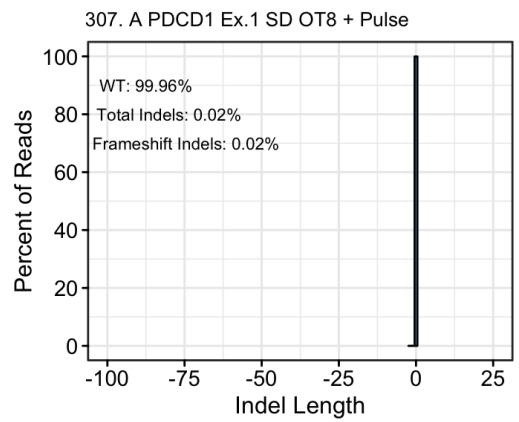

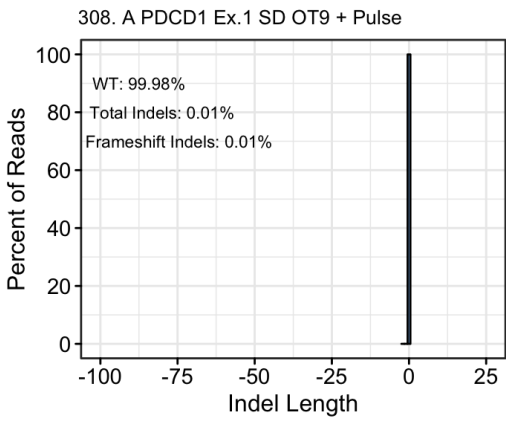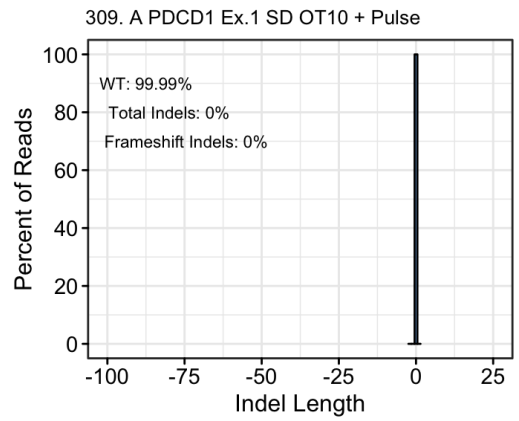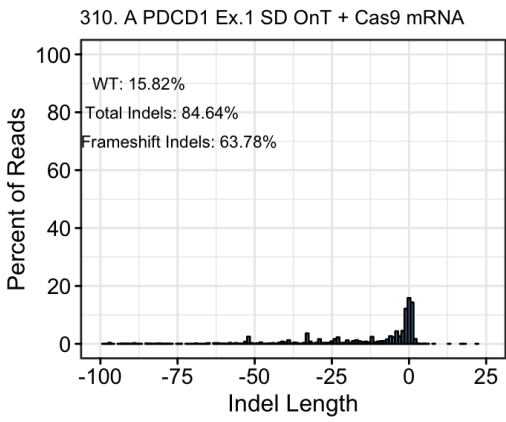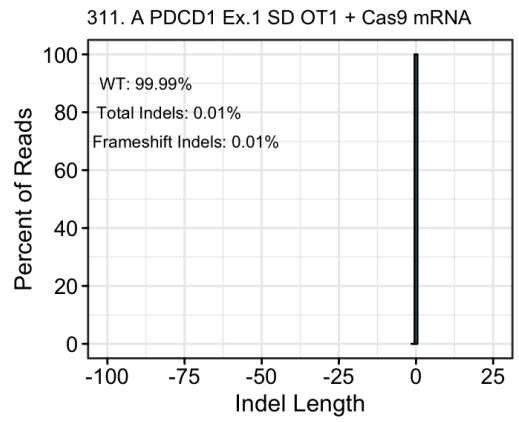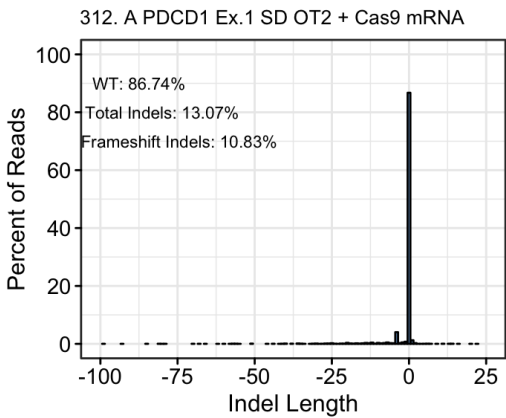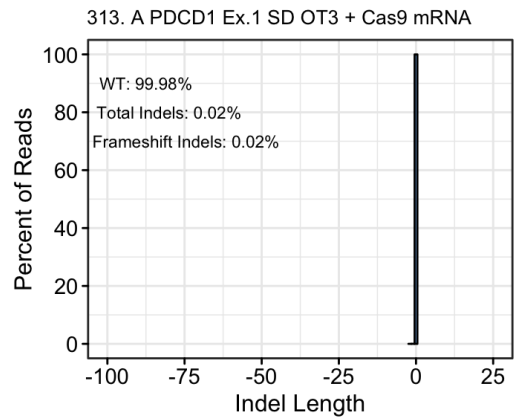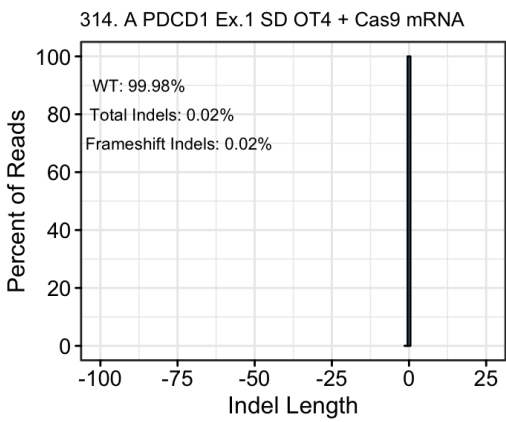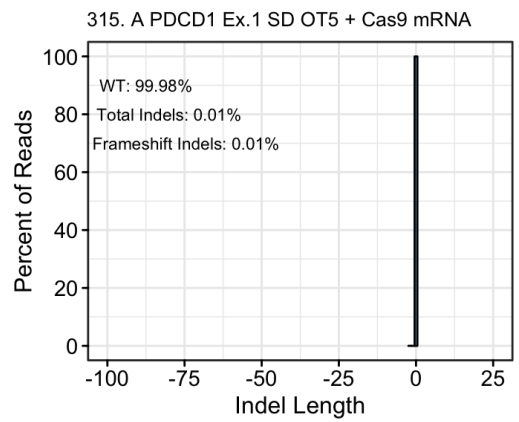



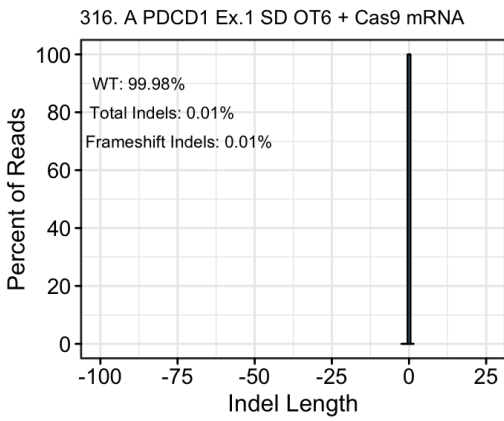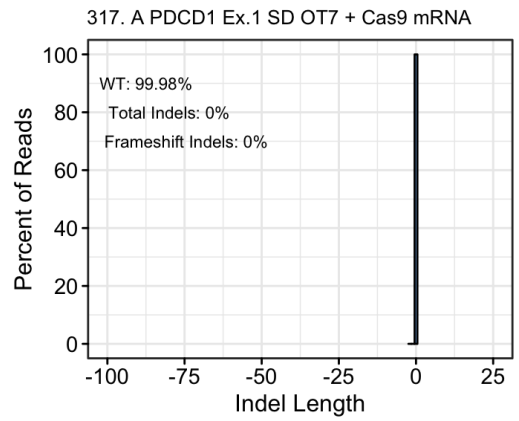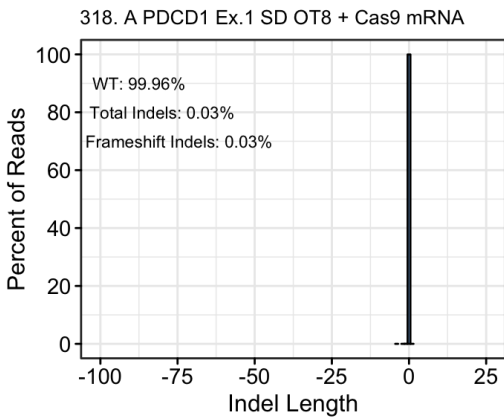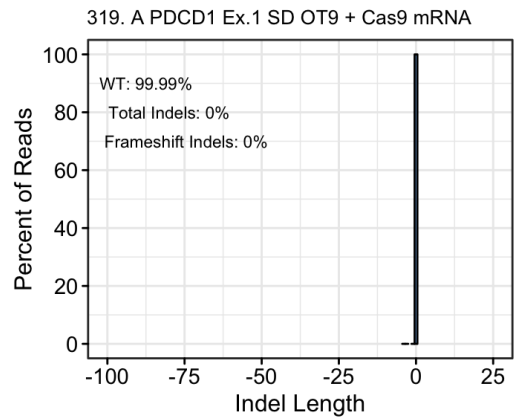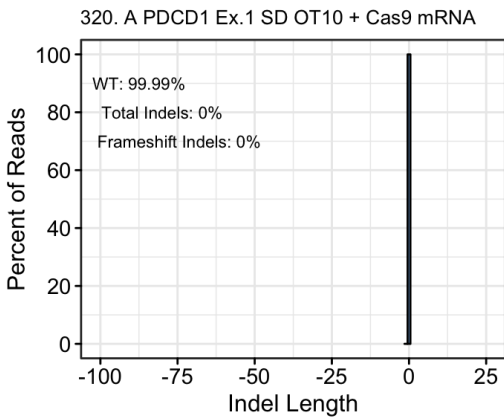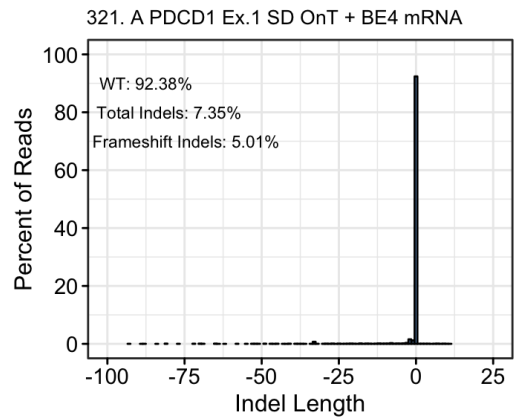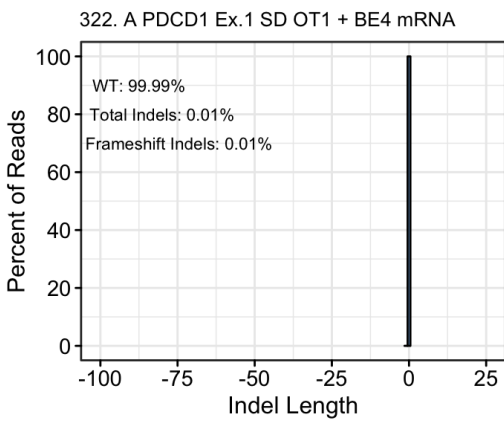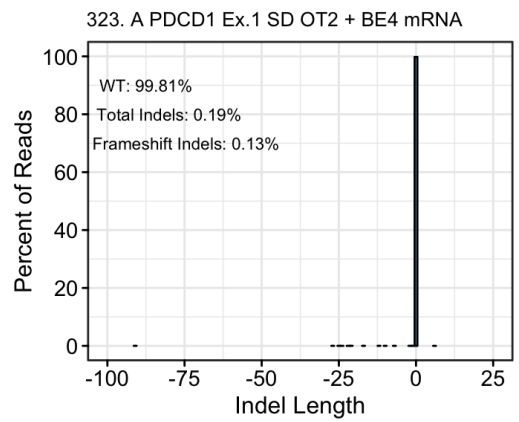

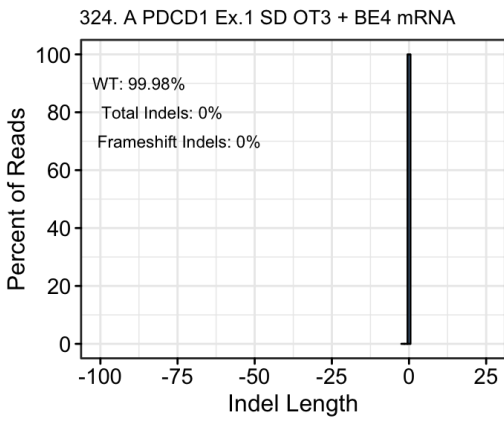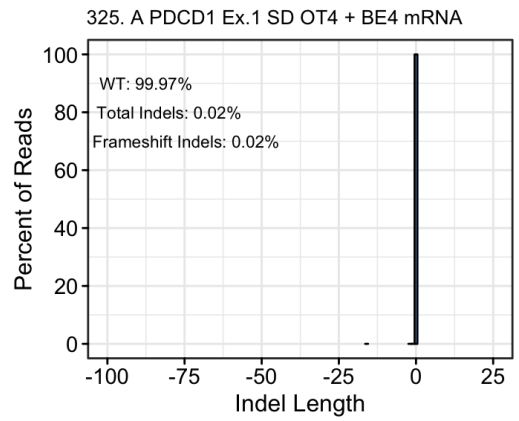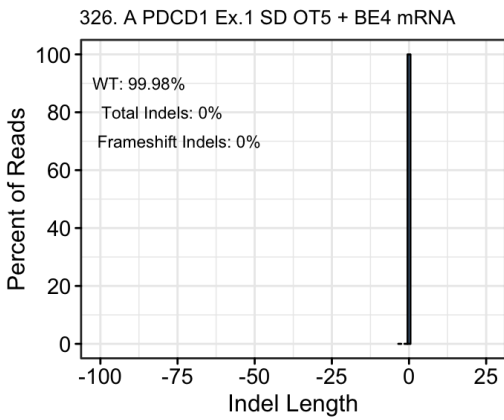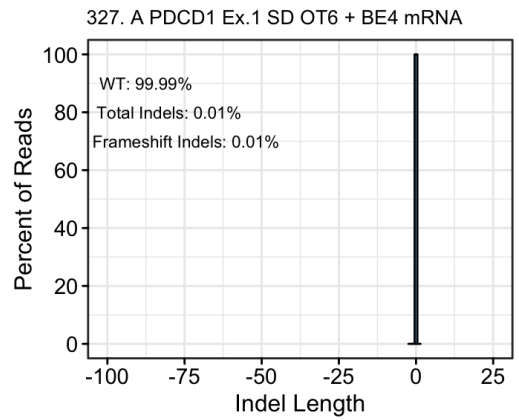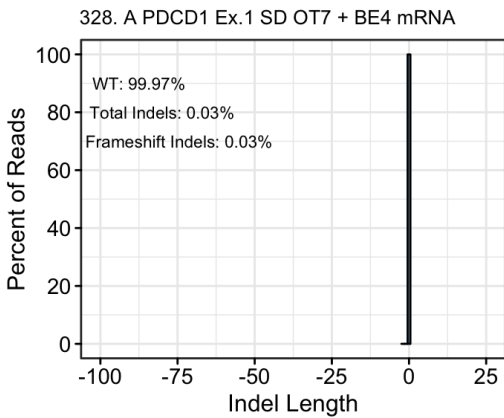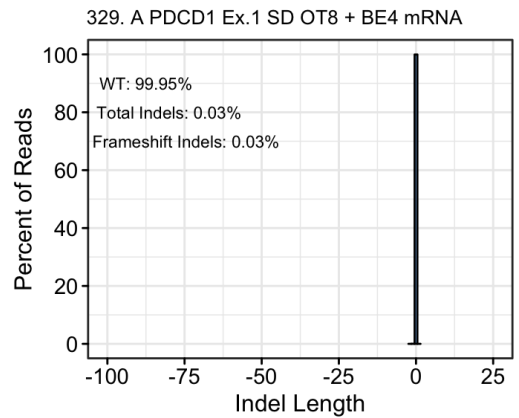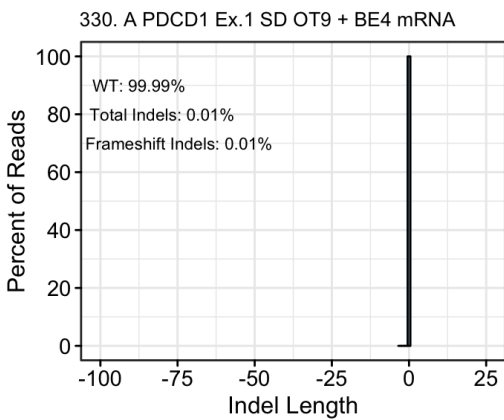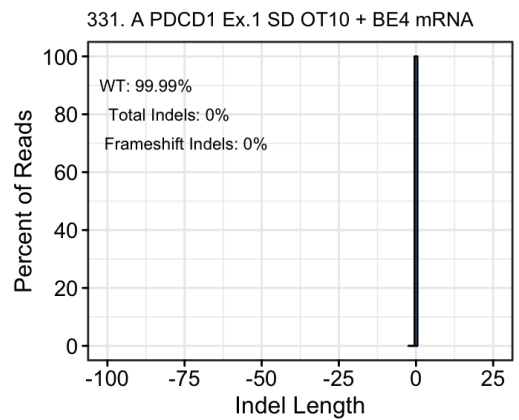

Supplement: 41467_2019_13007_MOESM3_ESM.pdf [file 41467_2019_13007_MOESM3_ESM.pdf]
