# Supplementary material for: Highly efficient multiplex human T cell engineering without double-strand breaks using Cas9 base editors
Source: PubMed Central journal article supplement (PMC6864045; doi:10.1038/s41467-019-13007-6), 2019-11-19
Supplement: 41467_2019_13007_MOESM5_ESM.pdf [file 41467_2019_13007_MOESM5_ESM.pdf]

**File Name: Supplementary Data 1**

**Description:** Tile plots of Next Generation Sequencing

**File Name: Supplementary Data 2**

**Description:** Bar Plots of Next Generation Sequencing

**File Name: Supplementary Data 3**

**Description:** Indel Distribution Plots of Next Generation Sequencing
